# Supplementary material for: Chronic conditions patient’s perception of post-COVID-19 pandemic teleconsulting continuation in primary care clinics: a qualitative descriptive study
Source: PubMed Central journal article supplement — BMJ Open. 2022 Dec 14;12(12):e066871. doi: 10.1136/bmjopen-2022-066871 (PMC9755907; doi:10.1136/bmjopen-2022-066871), 2022-12-14
Supplement: bmjopen-2022-066871.draft_revisions.pdf [file bmjopen-2022-066871.draft_revisions.pdf]

# BMJ Open

BMJ Open is committed to open peer review. As part of this commitment we make the peer review history of every article we publish publicly available.

When an article is published we post the peer reviewers' comments and the authors' responses online. We also post the versions of the paper that were used during peer review. These are the versions that the peer review comments apply to.

The versions of the paper that follow are the versions that were submitted during the peer review process. They are not the versions of record or the final published versions. They should not be cited or distributed as the published version of this manuscript.

BMJ Open is an open access journal and the full, final, typeset and author-corrected version of record of the manuscript is available on our site with no access controls, subscription charges or pay-per-view fees (<http://bmjopen.bmj.com>).

If you have any questions on BMJ Open's open peer review process please email [info.bmjopen@bmj.com](mailto:info.bmjopen@bmj.com)

# BMJ Open

## Continuity of teleconsultation in primary care clinics after the COVID-19 pandemic: Interviews with patients living with chronic diseases

|                               |                                                                                                                                                                                                                                                                                                                                                                                                                                                                                                                                                                                                                                                                                                                                                                                                                                                                                                                                                                                                                                                                                       |
|-------------------------------|---------------------------------------------------------------------------------------------------------------------------------------------------------------------------------------------------------------------------------------------------------------------------------------------------------------------------------------------------------------------------------------------------------------------------------------------------------------------------------------------------------------------------------------------------------------------------------------------------------------------------------------------------------------------------------------------------------------------------------------------------------------------------------------------------------------------------------------------------------------------------------------------------------------------------------------------------------------------------------------------------------------------------------------------------------------------------------------|
| Journal:                      | <i>BMJ Open</i>                                                                                                                                                                                                                                                                                                                                                                                                                                                                                                                                                                                                                                                                                                                                                                                                                                                                                                                                                                                                                                                                       |
| Manuscript ID                 | bmjopen-2022-066871                                                                                                                                                                                                                                                                                                                                                                                                                                                                                                                                                                                                                                                                                                                                                                                                                                                                                                                                                                                                                                                                   |
| Article Type:                 | Original research                                                                                                                                                                                                                                                                                                                                                                                                                                                                                                                                                                                                                                                                                                                                                                                                                                                                                                                                                                                                                                                                     |
| Date Submitted by the Author: | 21-Jul-2022                                                                                                                                                                                                                                                                                                                                                                                                                                                                                                                                                                                                                                                                                                                                                                                                                                                                                                                                                                                                                                                                           |
| Complete List of Authors:     | <p>Postras, Marie-Eve; Université de Sherbrooke, Department of Family Medicine and Emergency Medicine, Faculty of Medicine and Health Sciences; Centre de santé et de services sociaux de Chicoutimi, Québec, Canada</p> <p>Poirier, Marie-Dominique; Centre intégré universitaire de santé et de services sociaux du Saguenay-Lac-Saint-Jean du Québec</p> <p>Couturier, Yves; Université de Sherbrooke, social work</p> <p>T Vaillancourt, Vanessa; Université de Sherbrooke, ; Centre intégré universitaire de santé et de services sociaux du Saguenay-Lac-Saint-Jean du Québec,</p> <p>Cormier, Caroline; Université de Sherbrooke</p> <p>Gauthier, Gilles ; Centre intégré universitaire de santé et de services sociaux du Saguenay-Lac-Saint-Jean du Québec</p> <p>Gendron, Audrey; Université de Sherbrooke</p> <p>Oswick, Megan; Université de Sherbrooke</p> <p>Morin, Anaëlle; Université de Sherbrooke</p> <p>Blanchette, Patricia; Université de Sherbrooke</p> <p>Bernier, Andréanne; Université du Québec en Abitibi-Témiscamingue, Department of Health Sciences</p> |
| Keywords:                     | PRIMARY CARE, Telemedicine < BIOTECHNOLOGY & BIOINFORMATICS, COVID-19, Organisation of health services < HEALTH SERVICES ADMINISTRATION & MANAGEMENT, QUALITATIVE RESEARCH                                                                                                                                                                                                                                                                                                                                                                                                                                                                                                                                                                                                                                                                                                                                                                                                                                                                                                            |
|                               |                                                                                                                                                                                                                                                                                                                                                                                                                                                                                                                                                                                                                                                                                                                                                                                                                                                                                                                                                                                                                                                                                       |

SCHOLARONE™  
Manuscripts

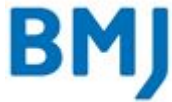

I, the Submitting Author has the right to grant and does grant on behalf of all authors of the Work (as defined in the below author licence), an exclusive licence and/or a non-exclusive licence for contributions from authors who are: i) UK Crown employees; ii) where BMJ has agreed a CC-BY licence shall apply, and/or iii) in accordance with the terms applicable for US Federal Government officers or employees acting as part of their official duties; on a worldwide, perpetual, irrevocable, royalty-free basis to BMJ Publishing Group Ltd ("BMJ") its licensees and where the relevant Journal is co-owned by BMJ to the co-owners of the Journal, to publish the Work in this journal and any other BMJ products and to exploit all rights, as set out in our [licence](#).

The Submitting Author accepts and understands that any supply made under these terms is made by BMJ to the Submitting Author unless you are acting as an employee on behalf of your employer or a postgraduate student of an affiliated institution which is paying any applicable article publishing charge ("APC") for Open Access articles. Where the Submitting Author wishes to make the Work available on an Open Access basis (and intends to pay the relevant APC), the terms of reuse of such Open Access shall be governed by a Creative Commons licence – details of these licences and which [Creative Commons](#) licence will apply to this Work are set out in our licence referred to above.

Other than as permitted in any relevant BMJ Author's Self Archiving Policies, I confirm this Work has not been accepted for publication elsewhere, is not being considered for publication elsewhere and does not duplicate material already published. I confirm all authors consent to publication of this Work and authorise the granting of this licence.

1  
2  
3 **Continuity of teleconsultation in primary care clinics after the COVID-19 pandemic: Interviews with**  
4 **patients living with chronic diseases**  
5  
6  
7

8 Marie-Eve Poitras \*, RN, PhD, Research chair on optimal professional practice in primary care,  
9 Department of Family Medicine and Emergency Medicine, Faculty of Medicine and Health  
10 Sciences, Université de Sherbrooke, Saguenay, Canada  
11  
12

13  
14 \*Corresponding author

15 305 Rue Saint Vallier, Chicoutimi,

16 QC G7H 5H6

17 418-541-1234, ext. 3249

18 [marie-eve.poitras@usherbrooke.ca](mailto:marie-eve.poitras@usherbrooke.ca)

19 ORCID: 0000-0002-3315-0190  
20  
21  
22  
23

24  
25 Marie-Dominique Poirier, Patient-partner, Centre intégré universitaire de santé et de services  
26 sociaux du Saguenay-Lac-Saint-Jean, Saguenay, Canada  
27  
28

29  
30 Yves Couturier, PhD, Department of Social Work, Université de Sherbrooke, Sherbrooke,  
31 Canada  
32

33 ORCID: 0000-0001-6848-8354  
34  
35

36  
37 Vanessa T. Vaillancourt, MSc, Department of Family Medicine and Emergency Medicine, Faculty  
38 of Medicine and Health Sciences, Université de Sherbrooke, Saguenay, Canada  
39

40 ORCID: 0000-0002-9187-2300  
41  
42

43 Caroline Cormier, M. Ps. Éd., Department of Family Medicine and Emergency Medicine, Faculty  
44 of Medicine and Health Sciences, Université de Sherbrooke, Saguenay, Canada  
45  
46

47  
48 Gilles Gauthier, Patient-Partner, Centre intégré universitaire de santé et de services sociaux du  
49 Saguenay Lac Saint Jean, Saguenay, Canada  
50  
51

52  
53 Audrey Gendron, MD (c), Department of Family Medicine and Emergency Medicine, Faculty of  
54 Medicine and Health Sciences, Université de Sherbrooke, Saguenay, Canada  
55

56 Megan L. Oswick, MD (c), Department of Family Medicine and Emergency Medicine, Faculty of  
57 Medicine and Health Sciences, Université de Sherbrooke, Saguenay, Canada  
58  
59

1  
2  
3  
4  
5  
6  
7  
8  
9  
10  
11  
12  
13  
14  
15  
16  
17  
18  
19  
20  
21  
22  
23  
24  
25  
26  
27  
28  
29  
30  
31  
32  
33  
34  
35  
36  
37  
38  
39  
40  
41  
42  
43  
44  
45  
46  
47  
48  
49  
50  
51  
52  
53  
54  
55  
56  
57  
58  
59  
60

Anaëlle Morin, MSc (c), Department of Family Medicine and Emergency Medicine, Faculty of  
Medicine and Health Sciences, Université de Sherbrooke, Saguenay, Canada

Patricia Blanchette, RN, MSc, PhD (c), Department of Family Medicine and Emergency  
Medicine, Université de Sherbrooke, Saguenay, Canada

Andréanne Bernier, RN, MSc, PhD (c), Department of Health Sciences, Université du Québec  
en Abitibi-Témiscamingue, Québec, Canada

**Word count**

4052

For peer review only

## Continuity of teleconsultation in primary care clinics after the COVID-19 pandemic: Interviews with patients living with chronic diseases

### Abstract

**Objectives** The COVID-19 pandemic has led to the prioritization of teleconsultation instead of face-to-face encounters. However, teleconsultation revealed some shortcomings and undesirable effects that may counterbalance benefits. The purpose of this study is to explore perspective of patients with chronic diseases on teleconsultation in primary care. This article also proposes recommendations to provide patient-oriented and appropriate teleconsultations.

**Design** We conducted a descriptive qualitative study which explored the perception of the patients regarding teleconsultation services and the following themes: access, perceived benefits, and disadvantages, interprofessional collaboration, patient-centered approach, specific competencies of professionals, and patient's global needs and preferences.

**Setting** Six primary care clinics in three regions of Quebec

**Participants** 39 patients were interviewed by telephone, through semi-structured qualitative interviews.

**Results** Patients want to maintain teleconsultation for the post-pandemic period, as long as their recommendations are followed: be able to choose to come to the clinic if they wish to, feel that their individual and environmental characteristics are considered, feel involved in the choice of the modality of each consultation, feel that interprofessional collaboration and patient-centered approach are promoted, and to maintain the professionalism, which must not be lessened despite the remote context.

**Conclusion** Patients expressed mostly high satisfaction with teleconsultation, however several issues must be addressed. Patients do and should contribute to the implementation of teleconsultation in primary care. They wish to be frequently consulted about their preferred consultation modality, which may change over time. The patient perspective must therefore be part of the balanced implementation of optimal teleconsultation that is currently taking place.

**Keywords** Primary care, telehealth or teleconsultation, chronic disease patients, patient-centered care.

### Strengths and limitations of this study

- 1  
2  
3  
4  
5  
6  
7  
8  
9  
10  
11  
12  
13  
14  
15  
16  
17  
18  
19  
20  
21  
22  
23  
24  
25  
26  
27  
28  
29  
30  
31  
32  
33  
34  
35  
36  
37  
38  
39  
40  
41  
42  
43  
44  
45  
46  
47  
48  
49  
50  
51  
52  
53  
54  
55  
56  
57  
58  
59  
60
- This article presents field data that reports on patients' experiences and perceptions of teleconsultation in primary care.
  - Our partnership and patient-oriented research approach ensures that the data presented are those that emerge from patients' concerns.
  - The high rate of patient satisfaction with the teleconsultation could have been influenced by acquiescence and desirability bias[1 ,2]
  - Patients' recommendations for continuing teleconsultation services after COVID-19 were not differentiated by health condition, which should be taken into consideration when interpreting the results.

## INTRODUCTION

Since March 2020, public health measures adopted in several countries in response to the COVID-19 pandemic have led to the prioritization of teleconsultation over face-to-face services in primary care health organizations. Teleconsultation is defined as any interaction between a patient and a health care professional that takes place at a distance and uses some form of information technology (e.g., virtual approaches via videoconferencing through Zoom, Teams, and Reacts) or communication (e.g., telephone, email, SMS)[3]. Although teleconsultation had been used sporadically across the world, the COVID-19 health crisis led to major advances in the deployment and use of this mode of intervention in several primary care clinics[4 ,5]. These primary care clinics propose health and social services provided by general practitioners working closely with other health and social services professionals, such as nurses and social workers[6].

As teleconsultation will remain after the COVID-19 pandemic [3 ,7-9] at least for certain reasons of consultation, in the post-pandemic period[10 ,11 ,12] the use of teleconsultation revealed some shortcomings and undesirable effects[13-17]. For example, the number of inappropriate or late visits to emergency departments has reportedly increased[18] and this mode of care restricts access to services for people with limited mobility, limited access to the Internet or teleconsultation tools, or low levels of digital literacy[16 ,19]. These undesirable effects may counterbalance the positive effects of teleconsultation demonstrated in the scientific literature[20]. Consideration of patient experience in this rapid and forced march towards teleconsultation allows for a better trade-off between the high potential for improved patient experience or health and the adverse effects of this innovation.

In the past year, various recommendations have been published to support good practice in teleconsultation[4 ,21 ,22]. These recommendations are highly useful in supporting healthcare professionals towards proper implementation of teleconsultation in healthcare settings between a patient and a clinician from an intraprofessional and clinician-centred perspective. However, they may be considered incomplete as they do not consider the needs, preferences and general representation of patients living with chronic diseases with respect to teleconsultation.

Furthermore, the tools supporting teleconsultation are built from a clinician's perspective without integrating the patient's perspective.



1  
2  
3 Some authors explored the factors related to a positive experience (or not) of care in  
4 teleconsultation from the perspective of patients[23-28] but there very few focused on patients  
5 with chronic diseases in primary care [29 ,30]. In addition, patient-led studies incorporating the  
6 concept of patient-oriented research are rare. Since few scientific recommendations have been  
7 identified on teleconsultation for professionals working in primary care clinics and considering  
8 that patients with chronic illnesses are those who consult family medicine practices most  
9 frequently[31], we propose that they are in the best position to testify to the experience of  
10 teleconsultation in primary care. As the desire to sustain teleconsultation in primary care takes  
11 hold, it seems essential to incorporate the patient perspective during this rapidly accelerating  
12 phase of innovation about teleconsultation. To do so, our study, led by two patient-partners, has  
13 the following two objectives: 1) to explore the perspective of patients with chronic diseases on  
14 the teleconsultation offered in primary care clinics; and 2) to make general recommendations  
15 regarding the post-pandemic adequacy between the teleconsultation offer and the needs and  
16 expectations of patients with chronic diseases.  
17  
18  
19  
20  
21  
22  
23  
24  
25  
26

## 27 28 **METHODS**

### 29 30 **Patient and public involvement**

31  
32  
33 We conducted[32] a longitudinal descriptive qualitative study[33] with two measurement  
34 times[34] in six primary care clinics in three regions (metropolitan, urban and semi-urban) of  
35 Quebec, Canada. Primary care clinics in Quebec context of care are defined as a group of family  
36 doctors who work together and in close collaboration with other health and social services  
37 professionals (e.g., nurse, social worker) [6].The research was led by two patient partners, two  
38 researchers and one clinical decision-maker. The patient and clinical co-leaders supported the  
39 researchers in carrying out the project according to the partnership methodologies guided by the  
40 Canadian Institutes of Health Research. For example, the research question was formulated  
41 because of the patient co-leaders' concerns about teleconsultation in primary care. Our project is  
42 also guided by a partnership approach. We used the COREQ self-assessment grid for  
43 qualitative studies to report on the rigor and methodology of this project[35].  
44  
45  
46  
47  
48  
49  
50  
51  
52

### 53 **Sample**

54  
55 We built a convenience sample of 49 registered patients from the Training of Trainers in Primary  
56 care (F2PL) study[36]. We contacted these individuals by phone by the patient partners or a  
57  
58  
59

1  
2  
3 research agent. The participants are patients living with chronic diseases who are followed by  
4 family physicians in a primary care clinic and, sometimes, in collaboration with a clinical nurse  
5 and/or a social worker. The project #2019-037 obtained ethical approval from the Centre intégré  
6 universitaire de santé et de services sociaux du Saguenay Lac-St-Jean and all participants  
7 provided consent to participate in the interview.  
8  
9  
10  
11

## 12 **Data collection**

13  
14  
15 A research team member first contacted patients during the first wave of the COVID-19  
16 pandemic, between March and August 2020, to ask them about their experience with  
17 teleconsultation. This initial data collection[34] highlighted patients' needs for teleconsultation  
18 services. Between February and March 2021, we further explored this question by examining,  
19 among other things, patients' representations of pursuing teleconsultation, reasons for  
20 consultations conducive to teleconsultation, the impact of teleconsultation on interprofessional  
21 collaboration, as well as the use of the patient partnered care approach. We conducted semi-  
22 structured qualitative telephone interviews (Appendix 1: Interview guide) lasting approximately  
23 30 minutes in February 2021 by three research professionals (X), three graduate nursing  
24 students (X), as well as one patient partner (X) after a training provided by both principal co-  
25 investigators, X (junior) and X (senior). We audio recorded the interviews with the consent of the  
26 study participants. We have taken field notes during each interview to enrich data analysis.  
27  
28  
29  
30  
31  
32  
33  
34  
35

## 36 **Analysis**

37  
38  
39 Interviews were not transcribed but we performed qualitative analysis according to three  
40 concurrent streams: condensation (e.g., selection, transformation of raw data), presentation  
41 (e.g., narrative text, table, matrix) and verification of conclusions (e.g., go back to field notes for  
42 each patient, discussion with the research team). We conducted a deductive thematic  
43 analysis[33] of the interview data based on the themes explored by the interview guide, which  
44 are, in relation to teleconsultation: satisfaction with the services received, interprofessional  
45 collaboration, inclusion of significant relatives in care, digital literacy of patients, soft skills and  
46 attitudes of professionals, valuing experiential knowledge in shared decision making. We then  
47 coded the interviews by themes predetermined by two members of the research team, including  
48 a patient partner, that relate to the teleconsultation context by using Microsoft Word software.  
49 We explored the following seven themes: 1) access to primary care clinics services during a  
50 pandemic; 2) advantages and disadvantages of teleconsultation compared with face-to-face  
51  
52  
53  
54  
55  
56  
57  
58  
59  
60

encounters; 3) interprofessional collaboration; 4) healthcare professionals' competencies specific to teleconsultation; 5) the patient partnered approach to care; 6) avenues for improving measures of patients' perceptions of their care experience[37]; and 7) patients' needs and preferences during a teleconsultation. The principal investigators (X) and patient partner (X) validated the themes. At the end of the analysis cycle, a meeting with all members of the research team allowed for the extraction of proposals and recommendations.

## RESULTS

### Participants

Of the 49 participants initially recruited for the F2PL study, 39 agreed to participate in the present study, six were unreachable and four declined to participate. Table 1 presents the sociodemographic characteristics of the participants and table 2 their medical and psychosocial conditions.

**Table 1: Sociodemographic characteristics of the study participants**

| Characteristics                               | Patients (N=39)<br>n (%) |
|-----------------------------------------------|--------------------------|
| <b>Sex</b>                                    |                          |
| Male                                          | 16 (41)                  |
| Female                                        | 23 (59)                  |
| <b>Age (mean=60.5)</b>                        |                          |
| < 30                                          | 0 (0)                    |
| 31-40                                         | 5 (13)                   |
| 41-50                                         | 3 (8)                    |
| 51-64                                         | 17 (43)                  |
| 65 +                                          | 14 (36)                  |
| <b>Marital status<sup>a</sup></b>             |                          |
| Married/Common-law partner                    | 31 (80)                  |
| Single                                        | 3 (8)                    |
| Separated/Divorced                            | 4 (10)                   |
| <b>Highest level of education<sup>a</sup></b> |                          |
| Primary/High school                           | 10 (25)                  |
| Professional/College                          | 18 (46)                  |
| University                                    | 10 (25)                  |
| <b>Employment status<sup>a</sup></b>          |                          |
| Working                                       | 14 (36)                  |
| Work interruption                             | 7 (18)                   |
| Retired                                       | 15 (38)                  |
| Other                                         | 2 (5)                    |

| <b>Income (CAN\$)<sup>b</sup></b>          |         |
|--------------------------------------------|---------|
| [0 – 29 999]                               | 7 (17)  |
| [30 000 – 59 999]                          | 14 (36) |
| [60 000 – 99 999]                          | 9 (23)  |
| ≥100 000                                   | 5 (13)  |
| <b>Location</b>                            |         |
| Metropole                                  | 10 (26) |
| Rural                                      | 15 (38) |
| Urban                                      | 14 (36) |
| <b>Healthcare provider before COVID-19</b> |         |
| Family physician                           | 6 (15)  |
| Family physician and nurse                 | 16 (41) |
| Family physician and social worker         | 12 (31) |
| Family physician, nurse and social worker  | 5 (13)  |

<sup>a</sup> Data missing for 1 patient; <sup>b</sup> Data missing for 4 patients

**Table 2: Medical and psychosocial conditions of the study participants**

| <b>Medical and psychosocial conditions</b> | <b>Patients (N=39)</b> |
|--------------------------------------------|------------------------|
|                                            | <b>n (%)</b>           |
| <b>Type<sup>a</sup></b>                    |                        |
| Diabetes                                   | 13 (33)                |
| Arterial hypertension                      | 11 (28)                |
| Personal issues                            | 6 (15)                 |
| Difficulties adapting to situations        | 5 (13)                 |
| Mental health issues                       | 6 (15)                 |
| Coronary artery disease (CAD)              | 5 (13)                 |
| Cancer                                     | 4 (10)                 |
| Asthma                                     | 3 (7.5)                |
| Relationship issues                        | 4 (10)                 |
| Suicidal thoughts                          | 1 (2.5)                |
| Bereavement                                | 1 (2.5)                |
| Chronic obstructive pulmonary disease      | 1 (2.5)                |
| Heart failure                              | 0 (0)                  |
| Neurodegenerative disease                  | 0 (0)                  |
| Professional issues                        | 5 (13)                 |
| Other                                      | 15 (38)                |
| <b>Number of conditions</b>                |                        |
| 1                                          | 18 (46)                |
| 2-3                                        | 14 (36)                |
| 4-5≤                                       | 7 (18)                 |

<sup>a</sup> *Not mutually exclusive*

Analysis of the interview data allowed us to develop recommendations based on the perspective of the participants. Additional verbatims to support each of the findings are presented in Table 3.

**Table 3 Recommendations of patients living with chronic diseases regarding the continuity of teleconsultation after the COVID-19 pandemic**

| Recommendations                                                                                                                                                                                | Verbatims                                                                                                                                                                                                                                                                                                                                                                                                                                                                                                                                         | Participants identification         |
|------------------------------------------------------------------------------------------------------------------------------------------------------------------------------------------------|---------------------------------------------------------------------------------------------------------------------------------------------------------------------------------------------------------------------------------------------------------------------------------------------------------------------------------------------------------------------------------------------------------------------------------------------------------------------------------------------------------------------------------------------------|-------------------------------------|
| Considering its many advantages, the end of the pandemic must allow the continuity of teleconsultation services                                                                                | <i>"I don't have a driver's license; I don't have a car. So, I don't have to travel"</i><br><i>"It suits my needs [teleconsultation], because I don't have to spend"</i>                                                                                                                                                                                                                                                                                                                                                                          | 101-5-001                           |
| Face-to-face consultation must take precedence over teleconsultation when a physical examination is required                                                                                   | <i>"I had sores on my face, on the phone, it was more difficult"</i>                                                                                                                                                                                                                                                                                                                                                                                                                                                                              | 302-5-003                           |
| Consider the reasons for consultations and the individual and environmental characteristics of the patient to decide on the appropriateness of a face-to-face consultation or teleconsultation | <i>"Anything that has to do with social relations, when there's a lot of explaining or emotional issues...I think face-to-face would be much easier"</i><br><i>"My husband is deaf. The telephone consultation is not ideal. I absolutely have to make time to accompany my husband during phone meetings because he is not able to do it alone"</i><br><i>"I don't have internet...computers, internet, I don't know that..."</i>                                                                                                                | 202-5-001<br>102-5-004<br>101-5-010 |
| Involve the patient in choosing the consultation mode for each encounter                                                                                                                       | <i>"In my case, I don't have a relationship with my family doctor, I don't need to have one either. I'm not looking for that. If I needed a consultation with a social worker, I'd like it to be face to face because I'm looking more for the relationship"</i>                                                                                                                                                                                                                                                                                  | 202-5-001                           |
| Explain to the patient how the interprofessional dimension will be addressed                                                                                                                   | <i>"I don't know what the difference is between the nurse and the nutritionist"</i><br><i>"They [social worker, doctor, and nutritionist] write to each other every time I have a meeting. They know everything"</i>                                                                                                                                                                                                                                                                                                                              | 301-5-001<br>302-5-003              |
| Intervene according to the care approach in partnership with the patient in teleconsultation                                                                                                   | <i>"My healthcare professional asks questions and is interested in my problem, I don't perceive any change in his or her approach virtually compared to when I come to the office"</i><br><i>"He [the healthcare professional] asked me for my opinion, we decided to pursue this [in teleconsultation, regarding treatment choice]"</i>                                                                                                                                                                                                          | 202-5-007<br>301-5-006              |
| The positive attitudes expressed by healthcare professionals in a face-to-face setting must be maintained and perceived by patients in a teleconsultation setting                              | <i>"I had the impression that there was more time to listen to me. The first question was, «How are you»? It was in a calm way. On the phone, it's even more important, I find, because you don't see the person "</i><br><i>"Five to ten minutes late is acceptable to me. If it's longer than that, I would like to be notified. My doctor was about 30, 40 minutes late. I was at my office, doing paperwork while waiting for my teleconsultation, so it wasn't a problem, but for people who do not have a desk job it can be a problem"</i> | 202-5-005<br>201-5-001              |

## Findings

Through this unique perspective of experiential knowledge, we aim to promote the continuity and adequacy of teleconsultation services offered in primary care clinics following the pandemic (Appendix 2: Patients' 10 recommendations for continued teleconsultation after the pandemic).

### *1- Considering its many advantages, the end of the pandemic must allow the improved continuity of teleconsultation services*

According to the participants, teleconsultation brings its own set of benefits. As expressed by the patients interviewed, the savings in time and money are significant for routine clinical follow-up needs. In addition to the financial aspect, teleconsultation is also advantageous from an organizational point of view since it saves time. One patient mentioned that a teleconsultation lasting approximately fifteen minutes, saves him quadruple and more the time. This patient explained that the absence of travel allowed him to spend less time on his consultation in a primary care clinic. In addition, many patients reported not having to ask their employer to be released from work, not having to deal with unexpected road conditions (traffic jams, winter driving), losing time to find a parking space and waiting several minutes in a waiting room. For patients with young children or other family responsibilities, teleconsultation facilitates family logistics. However, this desired continuity must be accompanied by a review of the perverse effects of consultation. For example, teleconsultation must not delay the consultation process to emergency services or minimize the importance of interprofessional collaboration.

### *2- Face-to-face consultation must take precedence over teleconsultation when a physical examination is required*

During the pandemic period, some patients received teleconsultation services for which they would have preferred to be seen in person and for which certain concerns persisted after the meeting: "By telephone, it wasn't easy, I would have liked the doctor to look at my knee, she asked me if it was swollen. I couldn't see if it was swollen" (pt # 202-5-007). If a patient has a health condition that requires visual examination or auscultation by the clinician, an in-person consultation should be encouraged.

### *3- Consider the reasons for consultations and the individual and environmental characteristics of the patient to decide on the appropriateness of a face-to-face consultation or teleconsultation*

1  
2  
3  
4 The patient's reason for consultation must be considered when making the decision to offer a  
5 face-to-face or remote encounter. Indeed, certain reasons for consultation make patients  
6 uncomfortable when they must discuss them during a teleconsultation, such as consulting for a  
7 mental health-related reason or for one that has emotional components. For example,  
8 addressing weight gain over the phone can be difficult for some patients: "I gained weight, but I  
9 don't want to talk about my weight. I gained weight but she the doctor didn't see me. It's  
10 something that affects me too much to talk about on the phone" (Pt # 202-5-007). When dealing  
11 with potentially sensitive issues for patients, a face-to-face meeting should be preferred. The  
12 reasons for consultation reported by the patients and which lend themselves well to  
13 teleconsultation include: the follow-up of stable chronic conditions, the transmission of test  
14 results when they announce good news, or the renewal of prescriptions. These verbatims  
15 capture the possible motives: "When the results are nothing serious, give them to me by  
16 phone..." (Pt # 302-5-005). "It can be done in teleconsultation if it's just to renew, there's no  
17 problem" (Pt # 301-5-002).

18  
19 Individual characteristics must also be considered when deciding on the best consultation mode.  
20 In some situations, individual characteristics such as deafness make it impossible to offer  
21 teleconsultation services. Similarly, there are environmental characteristics that hinder patients'  
22 teleconsultation experience. Some patients have limited access to communication services such  
23 as the Internet and telephone. This is the case for the following participant: "My mother lives in a  
24 seniors' residence. The phones are connected to the Internet, if the power is down, the phone is  
25 not available" (Pt # 102-5-004).

#### 26 27 28 29 30 31 32 33 34 35 36 37 38 39 40 41 *4- Involve the patient in choosing the consultation mode for each encounter*

42  
43 The patient expresses personal preferences regarding the choice of teleconsultation or face-to-  
44 face mode. The patient expresses preferences depending on the type of professional services  
45 needed and their preferences change over time. For example, one patient expressed her needs  
46 as follows: "My needs have changed since the beginning of the pandemic last year. Before, I  
47 would have preferred to have a video-conference meeting, now the telephone meets my needs  
48 ... we just got used to the telephone and it's okay" (Pt # 302-5-003).

#### 49 50 51 52 53 54 55 56 57 58 59 60 *5- Explain to the patient how the interprofessional dimension will be addressed*



1  
2  
3  
4  
5  
6  
7  
8  
9  
10  
11  
12  
13  
14  
15  
16  
17  
18  
19  
20  
21  
22  
23  
24  
25  
26  
27  
28  
29  
30  
31  
32  
33  
34  
35  
36  
37  
38  
39  
40  
41  
42  
43  
44  
45  
46  
47  
48  
49  
50  
51  
52  
53  
54  
55  
56  
57  
58  
59  
60

Communication between professionals is associated with a positive care experience for patients: "I feel that there is a whole multidisciplinary team and that they don't hesitate to talk to each other, that they know each other's strengths" (Pt # 201-5-005). Patients appreciate when the collaboration between professionals is carried out in the same way as during a face-to-face meeting: "I had the impression that they were more available [with the use of technology]. When my doctor isn't available, the super nurse meets with me. That works for me" (Pt # 202-5-005).

#### *6- Intervene according to the care approach in partnership with the patient in teleconsultation*

In the patient partnered approach to care, the patient is an active participant in the meetings and must feel being listened by the healthcare professional to express their needs[38]. However, some patients felt that the teleconsultation did not allow them to express all their needs: "It's hard to talk on the phone, I have less chit-chat than face to face" (Pt # 302-5-005). Yet participants emphasized the value of their experiential knowledge, which they have acquired over time. This specific knowledge must be considered by the professional, including in the context of teleconsultation. The following example about the pain felt by a patient is telling: "If I have problems because of chemotherapy, I am the one who has the pain, I am the pain specialist. If it's not strong enough, I'll tell my doctor, but they know how far I can go, I don't know that..." (Pt # 301-5-003).

#### *7- The positive attitudes expressed by healthcare professionals in a face-to-face setting must be maintained and perceived by patients in a teleconsultation setting*

Despite the distance, the patient feels an eventual lack of professionalism in teleconsultation. Patients interviewed found important to feel the availability and attentiveness of the professional in teleconsultation. Similarly, punctuality is a professional attitude that is important to the care experience: "I find it important that the professional is on time for the teleconsultation meeting" (Pt # 201-5-001).

Patients named other important professional attitudes to be maintained by professionals during teleconsultation, namely: empathy, trust, consideration, the feeling that the professional has knowledge related to his or her field of practice, communication (especially for follow-up information) and the preparation of the professional before an encounter. This verbatim excerpt supports the importance of professional attitudes: "I find it important to know that the



1  
2  
3 professional knows my case. There are doctors who ask why did you come?... Look in my  
4 medical record" (Pt # 102-5-006).

5  
6  
7 Patients underlined the risk that technological mediation may be the gateway to fewer  
8 professional attitudes: "Sometimes I would hear him cleaning his house at the same time as his  
9 consultation, doing his dishes and then going to make himself a little supper... I even heard a  
10 toilet flush during my appointment [...]" (Pt # 101-5-003).

## 14 15 **DISCUSSION**

16  
17 The data collected at two points in time during phases 1 (February to July 2020) and 3 (March to  
18 July 2021)[39] of the pandemic allowed us to identify the expectations of patients with chronic  
19 diseases regarding the teleconsultation services offered in primary care clinics. First, patients  
20 mentioned several advantages related to teleconsultation. They state the relevance of  
21 maintaining teleconsultation after the health crisis caused by COVID-19. However, patients'  
22 characteristics must be known and considered to decide on the best meeting mode for them.  
23 Despite the distance imposed by the change in service provision related to COVID-19, patients  
24 must be able to express their preferences and maintain their ability to participate in healthcare  
25 decisions that affect them. Interprofessional collaboration and a partnership approach to care  
26 with the patient must remain at the heart of professional teleconsultation practices. Moreover,  
27 they must be explicit despite the teleconsultation. Finally, certain attitudes expressed by  
28 healthcare professionals must be felt and perceived by the patient during the consultation.  
29 These results have allowed us to identify general recommendations from the patients'  
30 perspective, which are explained below.

31  
32 We found patients' overall positive assessment of teleconsultation. This observation is  
33 consistent with the literature[40]. Our results corroborate what Ramaswamy & al (2020) [41]  
34 reported from a cohort study of 40,000 patients that teleconsultation is associated with higher  
35 patient satisfaction compared with face-to-face visits. Our study adds to these data and  
36 demonstrates that this principled adherence is conditional on meeting key conditions recognized  
37 by patients. Patient satisfaction is partly explained by the pragmatic efficiency of  
38 teleconsultation, such as time saving, money saving and the impact on daily life of a short  
39 consultation for the professional. In addition, the perception of faster access to healthcare  
40 professionals is highly valued. These efficiency indicators from the users' point of view are often  
41 cited by patients and associated with a positive experience of care for them[37]. Similarly, as

1  
2  
3 mentioned by Schaller et al. (2021)[42], the digitization of practices, as accelerated by the  
4 pandemic, is a modality that will endure in the post-pandemic period. We believe, however, that  
5 this potential for sustainability has conditions for improvement and success, and that the  
6 patient's perspective in identifying these is very useful.  
7  
8  
9

10  
11 From the patient's perspective, teleconsultation should not be used systematically, despite its  
12 great potential. Certain reasons of consultation and individual and environmental characteristics  
13 make teleconsultation inappropriate and must, therefore, be considered when choosing the best  
14 consultation mode. The patient must be considered as a key partner in the analysis of these  
15 reasons for each situation where teleconsultation is potentially useful[43], as corroborated by the  
16 data in this study.  
17  
18  
19  
20  
21

22 According to an evaluation report of an healthcare organization[20] and in accordance with the  
23 recommendations of a medical association[43], the need to perform a physical or psychological  
24 examination is a reason for consultation that is not compatible with teleconsultation, due to the  
25 possible risks for patients. Some health conditions, co-morbidities or multiple chronic diseases  
26 may also affect the patient's ability to benefit from teleconsultation services[21]. This is the case  
27 for patients with advanced age, cognitive impairments, and severe mental health problems[10  
28 ,20 ,43]. Issues related to mental health and teleconsultation have been raised by primary care  
29 nurses who have expressed unease in using technology with clients with mental or psychosocial  
30 problems[11].  
31  
32  
33  
34  
35  
36  
37

38 Teleconsultation can also be a source of health inequity. A study by Khoong et al (2021)[44]  
39 found that the most significant barrier to teleconsultation is limited access to the Internet and  
40 mobile data. Internet costs and digital literacy are therefore factors that may be limiting for some  
41 patients and hinder the provision of teleconsultation services. In order to determine the best  
42 consultation mode, the French Haute Autorité de la santé[45] mentions that the professionals  
43 must ensure the patient's eligibility for such a teleconsultation mode by considering several  
44 factors, such as the clinical situation, the ability to communicate at a distance, individual factors  
45 (physical, psychological, socio-professional, family), confidentiality at a distance, and the nature  
46 of the care (e.g., physical contact necessary). However, we believe that this analysis must be  
47 done in partnership with the patient. The latter has a unique experiential knowledge acquired  
48 over time through daily experience with the health condition. The benefits and limitations of  
49 teleconsultation should be known to the patient. This is part of a collaborative care approach  
50  
51  
52  
53  
54  
55  
56  
57  
58  
59  
60

1  
2  
3 with the patient which is designed to ensure that decisions are made with the patient's needs  
4 and preferences in mind.  
5  
6

7 Some patients reported a lack of communication between healthcare professionals during  
8 teleconsultation. Patients had to repeat their needs and health history to each healthcare  
9 professional involved so that everyone was aware of their situation. This negatively impacts the  
10 patient's experience of care[37]. According to the literature review by Graves and Doucet  
11 (2016)[46], there are several barriers to interprofessional collaboration to consider in  
12 teleconsultation. These include technical issues caused by technology, as well as coordination  
13 and organizational challenges, such as ambiguous responsibilities or increased workload  
14 caused by teleconsultation. Similarly, difficult relationships between professionals, marked by a  
15 lack of trust and tension, have a negative impact on teleconsultation collaboration within the  
16 team[47]. In addition, the technology used can have a mono-disciplinary silo effect if it promotes  
17 solo (clinician-patient) meetings that replace formal and informal consultation between  
18 clinicians[17 ,48]. If teleconsultation meetings are to be maintained over time, it seems  
19 appropriate to equip professionals with the skills needed for interprofessional collaboration at a  
20 distance[49].  
21  
22

23 Some patients reported feeling less comfortable expressing their needs in teleconsultation. As a  
24 result, encounters are quicker, colder, more informal, or even incomplete. The partnership  
25 approach to care with the patient must remain central even in the teleconsultation context. In this  
26 regard, the family member can also be consulted for decision-making purposes, if the patient so  
27 wishes[5]. One study has shown that teleconsultation encounters are more likely to reproduce a  
28 paternalistic approach to care, where the professional speaks more and controls the dialogue,  
29 while the patient has a more passive role[50]. Schaller & al.[42] mention that the patient must be  
30 the conductor of his or her care pathway, even in teleconsultation. This implies access to quality,  
31 useful and understandable information from healthcare professionals.  
32  
33

34 Based on data collected in this study, we believe that the rapid adoption of teleconsultation in  
35 response to the healthcare measures imposed by pandemic crisis may have hindered the  
36 implementation of the patient centered approach. Indeed, professionals had to adapt quickly,  
37 adding the additional burden of the health crisis, which may have had an impact on their well-  
38 being and mental health[11 ,51]. In addition, technologies used were not always mature enough  
39 to support intelligent teleconsultation, such as appointment scheduling, clinical record  
40  
41  
42  
43  
44  
45  
46  
47  
48  
49  
50  
51  
52  
53  
54  
55  
56  
57  
58  
59  
60

1  
2  
3 information and teleconsultation itself. The telephone often served as the teleconsultation  
4 technology, which fell far short of the capabilities of the best available technology devices[52]. A  
5 post-pandemic routinization will therefore need to go beyond the telephone mode and rely on  
6 technological development commensurate with scientific and patient recommendations. We  
7 assume that the technological delay has had an impact on the adoption of good practices. It is  
8 therefore recommended to ensure that the patient has full access to information as well as the  
9 required technology supplies.

10  
11 Patients named several professional qualities and attitudes associated with a positive  
12 teleconsultation care experience. Many patients reported that a first encounter with a  
13 professional remotely makes them more uncomfortable. To this end, according to the literature  
14 review by Graves and Doucet (2016)[46], the importance of creating a relationship of trust  
15 between the professional and the patient is emphasized. This is created through quality  
16 communication and the experience of mutual understanding. The first visit with the patient  
17 should be face-to-face, to help build trust.

## 28 29 **CONCLUSION**

30  
31 The strict resumption of face-to-face clinical activities in primary care services, including the  
32 primary care clinics, would contribute to slowing down the modernization of services while  
33 risking a negative impact on the patient's experience of care. Indeed, patients perceive several  
34 benefits associated with teleconsultation and believe that it should be maintained in the post-  
35 pandemic period. However, teleconsultation should always be a win-win situation for both the  
36 patient and the clinician, ensuring that the patient is comfortable with it, and for each  
37 consultation. It is essential to take the time needed to effectively implement teleconsultation in  
38 primary care, particularly by highlighting the good practices of professionals to keep this  
39 encounter mode in line with patients' needs. We must emphasize the importance of  
40 documenting the perverse effects of imperfect teleconsultation to correct them quickly before it  
41 becomes routinized and bad behaviors crystallize. Finally, healthcare systems have gone  
42 through a technological advancement precipitated by the pandemic crisis and the integration of  
43 the patient experience has often been sidelined. The experiential knowledge of patients makes  
44 them credible and indispensable actors in the improvement of health care and services. The  
45 patient perspective must therefore be part of the balanced implementation of optimal  
46 teleconsultation that is currently taking place.

## Statements and Declarations

The authors declare having no potential conflicts of interest with respect to the research, authorship and/or publication of this article. Also, no financial interest or benefit arisen from the direct application of this study. This work was supported by the Fonds de Recherche du Québec en Santé under Grant number PCIBL-2.

## Acknowledgments

The authors would like to thank all the participants for their valuable contribution to this research and Priscilla Beaupré and Amélie Boudreault for their help in collecting the data. Marie-Eve Poitras (junior) received a Research Career Scholar from the Fond de la recherche du Québec en santé (FRQS) and holds an academic chair of the Université de Sherbrooke on Optimal Professional Practices in Primary Care. This study was financially supported by the Fonds de recherche en Santé du Québec (FRQS), Grant number PCIBL-2.

## Author contributions

MEP (female), YC (male), MDP (female), GG (male) contributed to the study conception and design. All authors contributed to material preparation, data collection and analysis. The first draft of the manuscript was written by CC (female) and VTV (female) and all authors commented on previous versions of the manuscript. All authors read and approved the final manuscript.

## Ethics approval

The study (project #2019-037) obtained ethical approval from the Centre intégré universitaire de santé et de services sociaux du Saguenay Lac-St-Jean and all participants provided consent to participate.

## References

1. Dunsch F, Evans DK, Macis M, et al. Bias in patient satisfaction surveys: a threat to measuring healthcare quality. *BMJ Global Health* 2018;3(2):e000694. doi: 10.1136/bmjgh-2017-000694
2. Hays RD, Ware JE. My Medical Care Is Better Than Yours: Social Desirability and Patient Satisfaction Ratings. *Medical Care* 1986;24(6):519-25.
3. Lemire F, Sisler J. L'intégration des soins virtuels en médecine de famille. *Canadian Family Physician* 2020;66(2):151-51.
4. Centre intégré de santé et de services sociaux de la Gaspésie. Guide de soutien en télésanté, lignes directrices et bonnes pratiques 2020 [Available from: <https://www.cisss-gaspesie.gouv.qc.ca/wp-content/uploads/2020/11/Guide-bonnes-pratiques-telesante-CISS-Gaspesie-Novembre-2020.pdf>].
5. Ministère de la Santé et des Services Sociaux. Utilisation de la télésanté en vertu du décret d'urgence sanitaire 2021 [Available from: <https://publications.msss.gouv.qc.ca/msss/fichiers/2021/21-915-01W.pdf>].
6. Gouvernement du Québec. Groupe de médecine de famille (GMF), groupe de médecine de famille universitaire (GMF-U) et super-clinique. 2021
7. Association médicale canadienne. Virtual care in Canada : Discussion paper. CMA health summit, 2019:24.
8. Editorial. Telehealth is here to stay. *Nature Medicine* 2021;27(7):1121-21. doi: 10.1038/s41591-021-01447-x
9. Mason R FTC. Telehealth is here to stay - Long after the pandemic. *Forbes* 2021 November 2.
10. Breton M, Hudon, Catherine, . La première vague de Covid-19 au Québec et les soins primaires. *Rev Med Suisse* 2020
11. Carrier J, Poitras, ME., Girard, A., Lesage, A., Cormier, C., & Berbiche, D. Outpatient follow-up practices and the well-being of primary care and mental health nurses during the first wave of the COVID-19 pandemic: A cross-sectional survey. *International journal of Nursing Studies* 2021
12. Unité d'évaluation médicale du CHRU de Nancy. Partenariat de soins. L'accès aux soins à distance & COVID 19 | Retours d'expériences des patients et professionnels de santé. Newsletter des patients partenaires du CHRU de Nancy/septembre2020 [Available from: [www.chu-nancy.fr/images/patients\\_partenaires\\_newsletter\\_02.pdf](http://www.chu-nancy.fr/images/patients_partenaires_newsletter_02.pdf)].
13. Isautier JM, Copp T, Ayre J, et al. People's Experiences and Satisfaction With Telehealth During the COVID-19 Pandemic in Australia: Cross-Sectional Survey Study. *Journal of medical Internet research* 2020;22(12):e24531. doi: 10.2196/24531 [published Online First: 2020/11/07]
14. Breton M, Sullivan E. E, Deville-Stoetzel N, et al. Telehealth challenges during COVID-19 as reported by primary healthcare physicians in Quebec and Massachusetts. *BMC family practice* 2021;22(1):192. doi: 10.1186/s12875-021-01543-4 [published Online First: 2021/09/27]
15. Foster MV, Sethares KA. Facilitators and barriers to the adoption of telehealth in older adults: an integrative review. *CIN: Computers, Informatics, Nursing* 2014;32(11):523-33.
16. Lopez AM, Lam K, Thota R. Barriers and Facilitators to Telemedicine: Can You Hear Me Now? *American Society of Clinical Oncology Educational Book* 2021(41):25-36. doi: 10.1200/edbk\_320827
17. Hardcastle L, Ogbogu U. Virtual care: Enhancing access or harming care? *Healthc Manage Forum* 2020;33(6):288-92. doi: 10.1177/0840470420938818 [published Online First: 2020/07/21]
18. Le Journal de Montréal. La télémédecine augmente les consultations aux urgences 2021 [Available from: <https://www.journaldemontreal.com/2021/04/25/la-telemedecine-augmente-les-consultations-aux-urgences-1>].
19. Indexsanté. Télémédecine : avantages et inconvénients 2020 [Available from: <https://www.indexsante.ca/chroniques/634/telemedecine-avantages-et-inconvenients.php>].



- 1
  - 2
  - 3
  - 4
  - 5
  - 6
  - 7
  - 8
  - 9
  - 10
  - 11
  - 12
  - 13
  - 14
  - 15
  - 16
  - 17
  - 18
  - 19
  - 20
  - 21
  - 22
  - 23
  - 24
  - 25
  - 26
  - 27
  - 28
  - 29
  - 30
  - 31
  - 32
  - 33
  - 34
  - 35
  - 36
  - 37
  - 38
  - 39
  - 40
  - 41
  - 42
  - 43
  - 44
  - 45
  - 46
  - 47
  - 48
  - 49
  - 50
  - 51
  - 52
  - 53
  - 54
  - 55
  - 56
  - 57
  - 58
  - 59
  - 60
20. Unité d'évaluation des technologies et des modes d'intervention en santé et en services sociaux. Évaluation exploratoire de la pertinence, de l'utilité et des impacts des téléconsultations 2020 [Available from: [https://iucpq.qc.ca/sites/default/files/rapport\\_etmis\\_telesante\\_iucpq-ciuss estrie\\_chus\\_09-2020.pdf](https://iucpq.qc.ca/sites/default/files/rapport_etmis_telesante_iucpq-ciuss estrie_chus_09-2020.pdf)].
21. Collège des médecins du Québec. Les téléconsultations réalisées par les médecins durant la pandémie de COVID-19 2020 [Available from: <http://www.cmq.org/publications-pdf/p-1-2020-03-31-fr-les-teleconsultations-realisees-par-les-medecins-durant-la-pandemie-de-covid-19.pdf>].
22. Gouvernement du Québec. Coffre à outils pour le professionnel de la santé 2020 [Available from: <https://telesantequebec.ca/aide-et-soutien/coffre-a-outils-pour-le-professionnel-en-telesante/>].
23. Ahmad F, Wysocki RW, Fernandez JJ, et al. Patient Perspectives on Telemedicine During the COVID-19 Pandemic. *Hand (New York, NY)* 2021;15589447211030692. doi: 10.1177/15589447211030692 [published Online First: 2021/09/14]
24. Bodine CD, Das DG, Haywood K, et al. Barriers to telehealth: The patient perspective. *Journal of Clinical Oncology* 2020;38(29\_suppl):266-66. doi: 10.1200/JCO.2020.38.29\_suppl.266
25. Ramaswamy A, Yu M, Drangsholt S, et al. Patient Satisfaction With Telemedicine During the COVID-19 Pandemic: Retrospective Cohort Study. *Journal of medical Internet research* 2020;22(9):e20786. doi: 10.2196/20786 [published Online First: 9.9.2020]
26. David J. Kirby JWF, Daniel B. Buchalter, Michael J. Moses, Eoghan T. Hurly, Dennis A. Cardone, S. Steven Yang, Mandeep S. Virk, Andrew S. Rokito, Laith M. Jazrawi, and Kirk A. Campbell. Patient and Physician Satisfaction with Telehealth During the COVID-19 Pandemic: Sports Medicine Perspective. *Telemedicine and e-Health* 2021;27(10):1151-59. doi: 10.1089/tmj.2020.0387
27. Hoyt K, Reynolds A. The Patient Perspective on Telemedicine. *Clinical Liver Disease*;n/a(n/a) doi: <https://doi.org/10.1002/cld.1188>
28. Ladin K, Porteny T, Perugini JM, et al. Perceptions of Telehealth vs In-Person Visits Among Older Adults With Advanced Kidney Disease, Care Partners, and Clinicians. *JAMA Network Open* 2021;4(12):e2137193-e93. doi: 10.1001/jamanetworkopen.2021.37193
29. Hiratsuka V, Delafield R, Starks H, et al. Patient and provider perspectives on using telemedicine for chronic disease management among Native Hawaiian and Alaska Native people. *International journal of circumpolar health* 2013;72 doi: 10.3402/ijch.v72i0.21401 [published Online First: 2013/08/27]
30. Omboni S, Ballatore T, Rizzi F, et al. Telehealth at scale can improve chronic disease management in the community during a pandemic: An experience at the time of COVID-19. *PLOS ONE* 2021;16(9):e0258015. doi: 10.1371/journal.pone.0258015
31. Fortin M, Bravo G, Hudon C, et al. Prevalence of Multimorbidity Among Adults Seen in Family Practice. *The Annals of Family Medicine* 2005;3(3):223. doi: 10.1370/afm.272
32. Parry David SJ, Macaulay C. Ann, . Guide sur la collaboration entre les chercheurs et les utilisateurs des connaissances dans la recherche en santé 2015 [Available from: <https://cihr-irsc.gc.ca/f/44954.html>].
33. Miles MB, Huberman AM, Saldana J. Qualitative data analysis: A methods sourcebook. 2014
34. Poitras M-E. Chronic disease patients' experience with telehealth interventions and self-care strategies during the first wave of the COVID-19 pandemic. 2021
35. Tong A, Sainsbury P, Craig J. Consolidated criteria for reporting qualitative research (COREQ): a 32-item checklist for interviews and focus groups. *International Journal for Quality in Health Care* 2007;19(6):349-57. doi: 10.1093/intqhc/mzm042
36. Poitras M-E MS, Couturier Y, Gagnon D, Duhoux A, Gaboury I, Doucet E, T Vaillancourt V, Ben Charif A, Ramond-Roquin A, Gauthier G, Poirier M-D, Lukewich J, Careau E, Ashcroft R, Delli Colli N, Hudon C. Co-design, implementation, and evaluation of an expanded train-the-trainer strategy to support the sustainability of evidence-based practice guides for family practice nurses and social workers in primary care clinic: A developmental evaluation protocol. *BMC family practice* 2022;In Press

- 1
- 2
- 3 37. Organisation for Economic Co-operation and Development. PaRIS survey of Patients with Chronic
- 4 Conditions 2019 [Available from: [https://www.oecd.org/health/health-systems/PaRIS-survey-](https://www.oecd.org/health/health-systems/PaRIS-survey-Patients-with-Chronic-Conditions-June-2019.pdf)
- 5 [Patients-with-Chronic-Conditions-June-2019.pdf](https://www.oecd.org/health/health-systems/PaRIS-survey-Patients-with-Chronic-Conditions-June-2019.pdf).
- 6
- 7 38. Le collège des médecins de famille du Canada. Soins centrés sur le patient dans les centres de
- 8 médecine de famille 2014 [Available from:
- 9 [https://patientsmedicalhome.ca/files/uploads/BA\\_PatCentre\\_FRE\\_Oct.10.2014\\_FINAL.pdf](https://patientsmedicalhome.ca/files/uploads/BA_PatCentre_FRE_Oct.10.2014_FINAL.pdf).
- 10
- 11 39. Institut national de santé publique du Québec. Ligne du temps COVID-19 au Québec 2022 [Available
- 12 from: <https://www.inspq.qc.ca/covid-19/donnees/ligne-du-temps>.
- 13
- 14 40. Flodgren G, Rachas A, Farmer AJ, et al. Interactive telemedicine: effects on professional practice and
- 15 health care outcomes. *Cochrane Database of Systematic Reviews* 2015(9)
- 16
- 17 41. Ramaswamy A, Yu M, Drangsholt S, et al. Patient Satisfaction With Telemedicine During the COVID-
- 18 19 Pandemic: Retrospective Cohort Study. *J Med Internet Res* 2020;22(9):e20786-e86. doi:
- 20 10.2196/20786
- 21
- 22 42. Schaller P, Kherad O, Jaunin-Stadler N, et al. Centre de santé de soins primaires: à quoi ressemblera-
- 23 t-il dans le futur? *Revue médicale suisse* 2021;17(738):934-38.
- 24
- 25 43. Collège des médecins du Québec. Rencontre en personne ou téléconsultation : comment trancher?
- 26 2021 [Available from: [http://www.cmq.org/publications-pdf/p-1-2021-02-18-fr-rencontre-en-](http://www.cmq.org/publications-pdf/p-1-2021-02-18-fr-rencontre-en-personne-teleconsultation-comment-trancher.pdf?t=1639497647477)
- 27 [personne-teleconsultation-comment-trancher.pdf?t=1639497647477](http://www.cmq.org/publications-pdf/p-1-2021-02-18-fr-rencontre-en-personne-teleconsultation-comment-trancher.pdf?t=1639497647477).
- 28
- 29 44. Khoong EC, Butler BA, Mesina O, et al. Patient interest in and barriers to telemedicine video visits in a
- 30 multilingual urban safety-net system. *Journal of the American Medical Informatics Association*
- 31 2021;28(2):349-53.
- 32
- 33 45. Haute Autorité de Santé. Réponses rapides dans le cadre du COVID-19 -Téléconsultation et télésoin
- 34 2020 [Available from: [https://www.has-sante.fr/jcms/p\\_3168867/fr/reponses-rapides-dans-le-](https://www.has-sante.fr/jcms/p_3168867/fr/reponses-rapides-dans-le-cadre-du-covid-19-teleconsultation-et-telesoin)
- 35 [cadre-du-covid-19-teleconsultation-et-telesoin](https://www.has-sante.fr/jcms/p_3168867/fr/reponses-rapides-dans-le-cadre-du-covid-19-teleconsultation-et-telesoin).
- 36
- 37 46. Graves M, Doucet S. Factors affecting interprofessional collaboration when communicating through
- 38 the use of information and communication technologies: a literature review. *Journal of Research*
- 39 *in Interprofessional Practice and Education* 2016;6(2)
- 40
- 41 47. Donnelly C, Ashcroft R, Bobbette N, et al. Interprofessional primary care during COVID-19: a survey of
- 42 the provider perspective. *BMC family practice* 2021;22(1):31. doi: 10.1186/s12875-020-01366-9
- 43 [published Online First: 2021/02/05]
- 44
- 45 48. Wharton G. A, Sood H. S, Sissons A, et al. Virtual primary care: fragmentation or integration? *The*
- 46 *Lancet Digital health* 2019;1(7):e330-e31. doi: 10.1016/s2589-7500(19)30152-9 [published
- 47 Online First: 2020/12/17]
- 48
- 49 49. Poitras M-E CY, Beaupré P, Girard A, Aubry F, T Vaillancourt V, Carrier J D, Fortin L, Racine J, Morin A,
- 50 Boudreault A, Cormier C. Les compétences en pratiques collaboratives interprofessionnelles des
- 51 professionnels de la santé et des services sociaux en contexte virtuel : une étude de portée.
- 52 *Conseil de recherches en sciences humaines du Canada (CRSH)* 2021
- 53
- 54 50. Agha Z, Roter DL, Schapira RM. An evaluation of patient-physician communication style during
- 55 telemedicine consultations. *Journal of medical Internet research* 2009;11(3):e36.
- 56
- 57 51. Collège des médecins de famille du Canada. Soins virtuels dans le Centre de médecine de famille.
- 58 Mississauga, ON, 2021:12.
- 59
- 60 52. Marshall EG, Breton M, Cossette B, et al. The PUPPY Study—Protocol for a Longitudinal Mixed
- Methods Study Exploring Problems Coordinating and Accessing Primary Care for Attached and
- Unattached Patients Exacerbated During the COVID-19 Pandemic Year. *medRxiv* 2021



1  
2  
3 **Continuity of teleconsultation in primary care after the COVID-19 pandemic : The perspective of**  
4 **patients living with chronic diseases**  
5

6 **Running heading: Perspective of patients living with chronic diseases on teleconsultation**  
7

8 **The Patient**  
9

10 Marie-Eve Poitras \*, RN, PhD, Research chair on optimal professional practice in primary care,  
11 Department of Family Medicine and Emergency Medicine, Faculty of Medicine and Health  
12 Sciences, Université de Sherbrooke, Saguenay, Canada  
13

14 \*Corresponding author

15 305 Rue Saint Vallier, Chicoutimi,

16 QC G7H 5H6

17 418-541-1234, ext. 3249

18 marie-eve.poitras@usherbrooke.ca

19 ORCID: 0000-0002-3315-0190  
20  
21

22 Marie-Dominique Poirier, Patient-partner, Centre intégré universitaire de santé et de services  
23 sociaux du Saguenay-Lac-Saint-Jean, Saguenay, Canada  
24

25 Yves Couturier, PhD, Department of Social Work, Université de Sherbrooke, Sherbrooke, Canada

26 ORCID: 0000-0001-6848-8354  
27  
28

29 Vanessa T. Vaillancourt, MSc, Department of Family Medicine and Emergency Medicine, Faculty of  
30 Medicine and Health Sciences, Université de Sherbrooke, Saguenay, Canada

31 ORCID: 0000-0002-9187-2300  
32  
33

34 Caroline Cormier, M. Ps. Éd., Department of Family Medicine and Emergency Medicine, Faculty of  
35 Medicine and Health Sciences, Université de Sherbrooke, Saguenay, Canada  
36

37 Gilles Gauthier, Patient-Partner, Centre intégré universitaire de santé et de services sociaux du  
38 Saguenay Lac Saint Jean, Saguenay, Canada  
39

40 Audrey Gendron, MD (c), Department of Family Medicine and Emergency Medicine, Faculty of  
41 Medicine and Health Sciences, Université de Sherbrooke, Saguenay, Canada  
42

43 Megan L. Oswick, MD (c), Department of Family Medicine and Emergency Medicine, Faculty of  
44 Medicine and Health Sciences, Université de Sherbrooke, Saguenay, Canada  
45

46 Anaëlle Morin, MSc (c), Department of Family Medicine and Emergency Medicine, Faculty of  
47 Medicine and Health Sciences, Université de Sherbrooke, Saguenay, Canada  
48

49 Patricia Blanchette, RN, MSc, Department of Family Medicine and Emergency Medicine,  
50 Université de Sherbrooke, Saguenay, Canada  
51

52 Andréanne Bernier, MN, Department of Health Sciences, Université du Québec en Abitibi-  
53 Témiscamingue, Québec, Canada  
54  
55  
56  
57  
58  
59  
60

## Electronic Supplementary Material

### Appendices

#### Appendix 1: Interview guide for patients of FMGs, participating in the F2PL project, on their perception of an ideal remote consultation in COVID-19 times

##### INTRODUCTION

Hello MR. or MS. (NAME OF PARTICIPANT), how are you?

My name is (YOUR NAME), I am a (research agent, student or patient-researcher) on the F2PL project team.

I am part of the F2PL research project in which you are participating, which aims to better understand how professionals in FMGs respond to patient needs. You met or spoke with members of our team in the fall of 2019 or winter of 2020. Our team did a phone interview with you this summer, do you remember?

MR. or MS. (NAME OF PARTICIPANT) is this a good time to talk to you?

1. NO: Can we schedule an appointment at a time that is more convenient for you? (Schedule an appointment and let him/her know we will contact him/her then, thank him/her and hang up)
2. YES: Continue

I am calling you today to hear from you and to ask you a few questions about your perception of the care and services you have received through remote consultations since the beginning of the pandemic in your FMG (medical clinic). A remote consultation is any follow-up by a healthcare professional that did not take place face-to-face.

Our call should last about 30 minutes.

May I ask you a few questions?

May I record our call?

1. PATIENT REFUSED: No problem, thank you. Our team will contact you again when it is time for the next F2PL interview.
2. PATIENT ACCEPTS: Great, thank you very much. If you agree, I will now record the interview.

##### INTERVIEW QUESTIONS

1. First of all, I would like to know how you're doing in this particular Covid-19 pandemic period?
2. Since our last call this summer, have you consulted a healthcare professional (or assisted a loved one in a meeting) in your FMG?

1  
2  
3 \* Note, if patients talk about their doctor, let them talk, then specify for nurses or SW's.  
4 If yes: question 3  
5 If no: would you have needed a consultation? If yes or no, why? If the meeting  
6 had been possible, how would you have liked this? question 4  
7  
8  
9

10 **3. Can you tell me about your experience from the beginning?**

11 Sub-questions:

- 12  
13 a. What professional(s) did you meet with?  
14  
15 i. What professionals other than the physician did you meet with?  
16  
17 ii. Was this the first time you met with this professional? How long  
18 have you been followed?  
19  
20 iii. Did you repeat any information that was already known by this  
21 professional?  
22  
23 b. How was the meeting conducted (or by what means)? (e.g. video  
24 conference, call, email, texting) ...  
25  
26 i. Where were you during this meeting?  
27  
28 ii. What were your concerns about confidentiality?  
29  
30 iii. Who accompanied you to your meeting?  
31  
32 c. If it was not by video, do you wish it had been?  
33  
34 d. How did this meeting meet your needs or reason for consultation?  
35  
36 e. How did the remote encounter help or hinder your comfort in talking with  
37 the healthcare professional?  
38  
39 f. What would it take for you to be comfortable? (help with using the  
40 platforms)  
41  
42 g. Why do you think some encounters are better suited for in-person than  
43 remote consultation?  
44  
45 h. How do you see teamwork among healthcare professionals?  
46  
47 i. How do you observe them sharing information?  
48  
49 ii. Have you had any conflicting discussions with them?  
50  
51 i. Why was the teleconsultation equivalent or not in terms of quality?  
52  
53 i. What were the differences in the professional's approach?  
54  
55 ii. What issues would you have liked to discuss with your  
56 professional, but did not dare to address?  
57  
58  
59  
60

- 1  
2  
3           j.       How did you feel called upon as an expert on your health condition during  
4                    your teleconsultation meeting?  
5  
6                    i.       How did you express your perception of the situation?  
7  
8                    ii.       How did you have time to think about the different options?  
9  
10                  iii.       How did you explore the benefits and advantages of each option?  
11  
12                  iv.       How were you able to express your personal values about  
13                    managing your health and the choices (treatments, etc.)  
14                    available?  
15  
16                  v.       How did they give importance to what was a priority for you?  
17  
18                  vi.       How was the involvement of your loved ones in your care  
19                    addressed?  
20  
21                  vii.       Do you have a follow-up care plan that addresses your health  
22                    and wellness needs? Has your healthcare provider reviewed your  
23                    medication in the past year? Did the md inquire if it was  
24                    appropriate for you (cost, side effects, etc.)  
25

26 (Expected answers: I spoke with the secretary; she was helpful, she guided me with the use of the  
27 web platform. They offered me if I wanted an in-person, phone or virtual meeting. I met X  
28 professional(s), by phone, because I don't have access to the internet).  
29  
30

31 **4.       Would you have any advice for the healthcare professionals in your FMG to make the**  
32 **remote consultation ideal?**  
33

34 *(Suggested probes to rephrase the question if needed):*

- 35       - How might healthcare professionals ensure that patients' needs have been met  
36       during a remote consultation?  
37           o How were you asked the question?  
38       - What's important to you in a remote encounter?  
39       - What are your needs and expectations during a remote encounter?  
40       - How would you like the teleconsultation meetings to continue over time?  
41  
42

43 (Expected responses: the doctor didn't move, I felt like the screen stopped working... I wish he  
44 had nodded... I found it harder to feel the empathy of the professional through the screen, he  
45 didn't tell me he would be taking notes during our encounter, I felt like he was disinterested... I  
46 would have liked him to ask me how I found the meeting or to make sure that my understanding  
47 was good, I have hearing difficulties, it was difficult for me to do the meeting by phone)  
48

49 **ACKNOWLEDGEMENTS**  
50

51 Thank you very much, MR. or MS. (NAME OF PARTICIPANT).  
52

53 If you agree, we may get back to you in a few months to chat again.  
54

55 Goodbye.  
56  
57  
58  
59  
60

1  
2  
3  
4  
5  
6  
7  
8  
9  
10  
11  
12  
13  
14  
15  
16  
17  
18  
19  
20  
21  
22  
23  
24  
25  
26  
27  
28  
29  
30  
31  
32  
33  
34  
35  
36  
37  
38  
39  
40  
41  
42  
43  
44  
45  
46  
47  
48  
49  
50  
51  
52  
53  
54  
55  
56  
57  
58  
59  
60

Appendix 2: The perspective of patients with chronic diseases - Recommendations for continuity of teleconsultation after the pandemic

For peer review only

The perspective of patients with chronic diseases

## Recommendations for continuity of teleconsultation after the pandemic

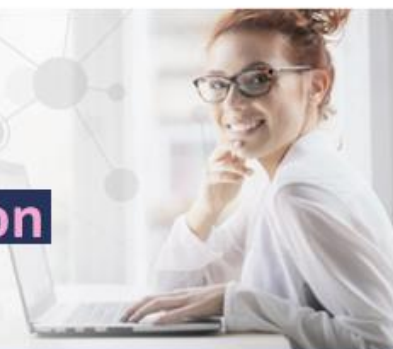

As a patient, I would like

1. To continue receiving teleconsultation services even after the pandemic, but not make it mandatory if it is not beneficial to me.
2. To know the advantages and disadvantages of teleconsultation and face-to-face meetings, so that I can form an opinion that suits my needs.
3. That my preferences are considered when choosing the consultation mode. I don't want to feel that the choice is imposed on me. I want to express myself for each meeting, because my needs evolve with time and my condition.
4. That the professional team considers both my personal characteristics and the determinants of my health as this may influence my ability to have teleconsultation meetings.
5. To have a meeting by phone for certain reasons for consultation, in particular during follow-ups when my condition is stable or for medication renewals, for example. This allows me to save time.
6. That in the event that the reason for my consultation requires a physical examination or visual observation by the healthcare professional, to be able to benefit from a face-to-face appointment from the outset, while avoiding a remote meeting, as this duplicates the appointments.
7. That even if I receive services in teleconsultation, my interprofessional team collaborates. I realize the lack of collaboration even if I am not physically present.
8. That my professional team exhibits the following attitudes for a positive care experience: punctuality, listening, empathy, trust, consideration, knowledge of their profession, availability, involvement, communication and active listening. I capture the professionalism even in teleconsultation.
9. That certain topics are avoided over the phone, especially when it comes to my mental health, weight gain, or other topics that make me uncomfortable.
10. To be able to invite a loved one to join the discussion if I wish. They should be able to hear and watch the consultation like me. I can also consult with him or her to make a decision if I feel the need.

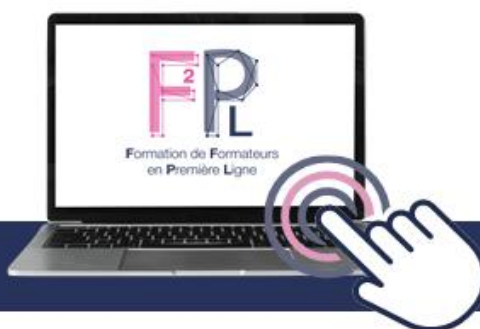

Poitras, ME., Couturier, V., Poirier MD., Massé S., T.Vaillancourt, V., Cormier, C., Morin, A., Beaupré P., Boudreault A., Blanchette P., Bernier AA. (2021).

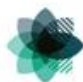

CHAIRE DE RECHERCHE  
SUR LES PRATIQUES  
PROFESSIONNELLES OPTIMALES  
EN SOINS PRIMAIRES

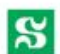

UNIVERSITÉ DE  
SHERBROOKE

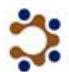

UNITÉ DE SOUTIEN  
SSA | QUÉBEC  
Ensemble pour un système de santé qui apprend

Fonds de recherche  
Santé  
Québec



## COREQ (COnsolidated criteria for REporting Qualitative research) Checklist

A checklist of items that should be included in reports of qualitative research. You must report the page number in your manuscript where you consider each of the items listed in this checklist. If you have not included this information, either revise your manuscript accordingly before submitting or note N/A.

| Topic                                          | Item No. | Guide Questions/Description                                                                                                                              | Reported on Page No. |
|------------------------------------------------|----------|----------------------------------------------------------------------------------------------------------------------------------------------------------|----------------------|
| <b>Domain 1: Research team and reflexivity</b> |          |                                                                                                                                                          |                      |
| <i>Personal characteristics</i>                |          |                                                                                                                                                          |                      |
| Interviewer/facilitator                        | 1        | Which author/s conducted the interview or focus group?                                                                                                   |                      |
| Credentials                                    | 2        | What were the researcher's credentials? E.g. PhD, MD                                                                                                     |                      |
| Occupation                                     | 3        | What was their occupation at the time of the study?                                                                                                      |                      |
| Gender                                         | 4        | Was the researcher male or female?                                                                                                                       |                      |
| Experience and training                        | 5        | What experience or training did the researcher have?                                                                                                     |                      |
| <i>Relationship with participants</i>          |          |                                                                                                                                                          |                      |
| Relationship established                       | 6        | Was a relationship established prior to study commencement?                                                                                              |                      |
| Participant knowledge of the interviewer       | 7        | What did the participants know about the researcher? e.g. personal goals, reasons for doing the research                                                 |                      |
| Interviewer characteristics                    | 8        | What characteristics were reported about the interviewer/facilitator? e.g. Bias, assumptions, reasons and interests in the research topic                |                      |
| <b>Domain 2: Study design</b>                  |          |                                                                                                                                                          |                      |
| <i>Theoretical framework</i>                   |          |                                                                                                                                                          |                      |
| Methodological orientation and Theory          | 9        | What methodological orientation was stated to underpin the study? e.g. grounded theory, discourse analysis, ethnography, phenomenology, content analysis |                      |
| <i>Participant selection</i>                   |          |                                                                                                                                                          |                      |
| Sampling                                       | 10       | How were participants selected? e.g. purposive, convenience, consecutive, snowball                                                                       |                      |
| Method of approach                             | 11       | How were participants approached? e.g. face-to-face, telephone, mail, email                                                                              |                      |
| Sample size                                    | 12       | How many participants were in the study?                                                                                                                 |                      |
| Non-participation                              | 13       | How many people refused to participate or dropped out? Reasons?                                                                                          |                      |
| <i>Setting</i>                                 |          |                                                                                                                                                          |                      |
| Setting of data collection                     | 14       | Where was the data collected? e.g. home, clinic, workplace                                                                                               |                      |
| Presence of non-participants                   | 15       | Was anyone else present besides the participants and researchers?                                                                                        |                      |
| Description of sample                          | 16       | What are the important characteristics of the sample? e.g. demographic data, date                                                                        |                      |
| <i>Data collection</i>                         |          |                                                                                                                                                          |                      |
| Interview guide                                | 17       | Were questions, prompts, guides provided by the authors? Was it pilot tested?                                                                            |                      |
| Repeat interviews                              | 18       | Were repeat interviews carried out? If yes, how many?                                                                                                    |                      |
| Audio/visual recording                         | 19       | Did the research use audio or visual recording to collect the data?                                                                                      |                      |
| Field notes                                    | 20       | Were field notes made during and/or after the interview or focus group?                                                                                  |                      |
| Duration                                       | 21       | What was the duration of the interviews or focus group?                                                                                                  |                      |
| Data saturation                                | 22       | Was data saturation discussed?                                                                                                                           |                      |
| Transcripts returned                           | 23       | Were transcripts returned to participants for comment and/or                                                                                             |                      |

| Topic                                  | Item No. | Guide Questions/Description                                                                                                        | Reported on Page No. |
|----------------------------------------|----------|------------------------------------------------------------------------------------------------------------------------------------|----------------------|
|                                        |          | correction?                                                                                                                        |                      |
| <b>Domain 3: analysis and findings</b> |          |                                                                                                                                    |                      |
| <i>Data analysis</i>                   |          |                                                                                                                                    |                      |
| Number of data coders                  | 24       | How many data coders coded the data?                                                                                               |                      |
| Description of the coding tree         | 25       | Did authors provide a description of the coding tree?                                                                              |                      |
| Derivation of themes                   | 26       | Were themes identified in advance or derived from the data?                                                                        |                      |
| Software                               | 27       | What software, if applicable, was used to manage the data?                                                                         |                      |
| Participant checking                   | 28       | Did participants provide feedback on the findings?                                                                                 |                      |
| <i>Reporting</i>                       |          |                                                                                                                                    |                      |
| Quotations presented                   | 29       | Were participant quotations presented to illustrate the themes/findings?<br>Was each quotation identified? e.g. participant number |                      |
| Data and findings consistent           | 30       | Was there consistency between the data presented and the findings?                                                                 |                      |
| Clarity of major themes                | 31       | Were major themes clearly presented in the findings?                                                                               |                      |
| Clarity of minor themes                | 32       | Is there a description of diverse cases or discussion of minor themes?                                                             |                      |

Developed from: Tong A, Sainsbury P, Craig J. Consolidated criteria for reporting qualitative research (COREQ): a 32-item checklist for interviews and focus groups. *International Journal for Quality in Health Care*. 2007. Volume 19, Number 6: pp. 349 – 357

**Once you have completed this checklist, please save a copy and upload it as part of your submission. DO NOT include this checklist as part of the main manuscript document. It must be uploaded as a separate file.**



# BMJ Open

## Chronic conditions patient's perception on post-COVID19 pandemic teleconsulting perennity in primary care clinics: A qualitative descriptive study

|                                 |                                                                                                                                                                                                                                                                                                                                                                                                                                                                                                                                                                                                                                                                                                                                                                                                                                                                                                                                                                                                                                                                                                                                                                                                               |
|---------------------------------|---------------------------------------------------------------------------------------------------------------------------------------------------------------------------------------------------------------------------------------------------------------------------------------------------------------------------------------------------------------------------------------------------------------------------------------------------------------------------------------------------------------------------------------------------------------------------------------------------------------------------------------------------------------------------------------------------------------------------------------------------------------------------------------------------------------------------------------------------------------------------------------------------------------------------------------------------------------------------------------------------------------------------------------------------------------------------------------------------------------------------------------------------------------------------------------------------------------|
| Journal:                        | <i>BMJ Open</i>                                                                                                                                                                                                                                                                                                                                                                                                                                                                                                                                                                                                                                                                                                                                                                                                                                                                                                                                                                                                                                                                                                                                                                                               |
| Manuscript ID                   | bmjopen-2022-066871.R1                                                                                                                                                                                                                                                                                                                                                                                                                                                                                                                                                                                                                                                                                                                                                                                                                                                                                                                                                                                                                                                                                                                                                                                        |
| Article Type:                   | Original research                                                                                                                                                                                                                                                                                                                                                                                                                                                                                                                                                                                                                                                                                                                                                                                                                                                                                                                                                                                                                                                                                                                                                                                             |
| Date Submitted by the Author:   | 10-Nov-2022                                                                                                                                                                                                                                                                                                                                                                                                                                                                                                                                                                                                                                                                                                                                                                                                                                                                                                                                                                                                                                                                                                                                                                                                   |
| Complete List of Authors:       | <p>Postras, Marie-Eve; Université de Sherbrooke, Department of Family Medicine and Emergency Medicine, Faculty of Medicine and Health Sciences; Centre de santé et de services sociaux de Chicoutimi, Québec, Canada</p> <p>Poirier, Marie-Dominique; Centre intégré universitaire de santé et de services sociaux du Saguenay-Lac-Saint-Jean du Québec</p> <p>Couturier, Yves; Université de Sherbrooke, social work</p> <p>T Vaillancourt, Vanessa; Université de Sherbrooke, ; Centre intégré universitaire de santé et de services sociaux du Saguenay-Lac-Saint-Jean du Québec,</p> <p>Cormier, Caroline; Université de Sherbrooke</p> <p>Gauthier, Gilles ; Centre intégré universitaire de santé et de services sociaux du Saguenay-Lac-Saint-Jean du Québec</p> <p>Massé, Sylvie; Centre intégré universitaire de santé et de services sociaux du Saguenay-Lac-Saint-Jean du Québec</p> <p>Gendron, Audrey; Université de Sherbrooke</p> <p>Oswick, Megan; Université de Sherbrooke</p> <p>Morin, Anaëlle; Université de Sherbrooke</p> <p>Blanchette, Patricia; Université de Sherbrooke</p> <p>Bernier, Andréanne; Université du Québec en Abitibi-Témiscamingue, Department of Health Sciences</p> |
| <b>Primary Subject Heading</b>: | General practice / Family practice                                                                                                                                                                                                                                                                                                                                                                                                                                                                                                                                                                                                                                                                                                                                                                                                                                                                                                                                                                                                                                                                                                                                                                            |
| Secondary Subject Heading:      | Patient-centred medicine, Qualitative research                                                                                                                                                                                                                                                                                                                                                                                                                                                                                                                                                                                                                                                                                                                                                                                                                                                                                                                                                                                                                                                                                                                                                                |
| Keywords:                       | PRIMARY CARE, Telemedicine < BIOTECHNOLOGY & BIOINFORMATICS, COVID-19, Organisation of health services < HEALTH SERVICES ADMINISTRATION & MANAGEMENT, QUALITATIVE RESEARCH                                                                                                                                                                                                                                                                                                                                                                                                                                                                                                                                                                                                                                                                                                                                                                                                                                                                                                                                                                                                                                    |
|                                 |                                                                                                                                                                                                                                                                                                                                                                                                                                                                                                                                                                                                                                                                                                                                                                                                                                                                                                                                                                                                                                                                                                                                                                                                               |

SCHOLARONE™  
Manuscripts



I, the Submitting Author has the right to grant and does grant on behalf of all authors of the Work (as defined in the below author licence), an exclusive licence and/or a non-exclusive licence for contributions from authors who are: i) UK Crown employees; ii) where BMJ has agreed a CC-BY licence shall apply, and/or iii) in accordance with the terms applicable for US Federal Government officers or employees acting as part of their official duties; on a worldwide, perpetual, irrevocable, royalty-free basis to BMJ Publishing Group Ltd ("BMJ") its licensees and where the relevant Journal is co-owned by BMJ to the co-owners of the Journal, to publish the Work in this journal and any other BMJ products and to exploit all rights, as set out in our [licence](#).

The Submitting Author accepts and understands that any supply made under these terms is made by BMJ to the Submitting Author unless you are acting as an employee on behalf of your employer or a postgraduate student of an affiliated institution which is paying any applicable article publishing charge ("APC") for Open Access articles. Where the Submitting Author wishes to make the Work available on an Open Access basis (and intends to pay the relevant APC), the terms of reuse of such Open Access shall be governed by a Creative Commons licence – details of these licences and which [Creative Commons](#) licence will apply to this Work are set out in our licence referred to above.

Other than as permitted in any relevant BMJ Author's Self Archiving Policies, I confirm this Work has not been accepted for publication elsewhere, is not being considered for publication elsewhere and does not duplicate material already published. I confirm all authors consent to publication of this Work and authorise the granting of this licence.

1  
2  
3 **Chronic conditions patient's perception on post-COVID19 pandemic teleconsulting**  
4 **perennity in primary care clinics: A qualitative descriptive study**  
5  
6

7 Marie-Eve Poitras \*, RN, PhD, Research chair on optimal professional practice in primary  
8 care, Department of Family Medicine and Emergency Medicine, Faculty of Medicine and  
9 Health Sciences, Université de Sherbrooke, Saguenay, Canada  
10  
11  
12

13  
14 \*Corresponding author

15 305 Rue Saint Vallier, Chicoutimi,

16 QC G7H 5H6

17 418-541-1234, ext. 3249

18 marie-eve.poitras@usherbrooke.ca

19 ORCID: 0000-0002-3315-0190  
20  
21  
22  
23  
24  
25

26 Marie-Dominique Poirier, Patient-partner, Centre intégré universitaire de santé et de  
27 services sociaux du Saguenay-Lac-Saint-Jean, Saguenay, Canada  
28  
29  
30

31 Yves Couturier, PhD, Department of Social Work, Université de Sherbrooke, Sherbrooke,  
32 Canada  
33  
34

35 ORCID: 0000-0001-6848-8354  
36  
37  
38

39 Vanessa T. Vaillancourt, MSc, Department of Family Medicine and Emergency Medicine,  
40 Faculty of Medicine and Health Sciences, Université de Sherbrooke, Saguenay, Canada  
41  
42

43 ORCID: 0000-0002-9187-2300  
44  
45

46 Caroline Cormier, M. Ps. Éd., Department of Family Medicine and Emergency Medicine,  
47 Faculty of Medicine and Health Sciences, Université de Sherbrooke, Saguenay, Canada  
48  
49

50 Gilles Gauthier, Patient-Partner, Centre intégré universitaire de santé et de services  
51 sociaux du Saguenay Lac Saint Jean, Saguenay, Canada  
52  
53  
54  
55  
56  
57  
58  
59  
60

1  
2  
3 Sylvie Massé, RN, MSc, MGO, Centre intégré universitaire de santé et de services  
4 sociaux du Saguenay-Lac-Saint-Jean, Saguenay, Canada.  
5  
6  
7

8  
9 Audrey Gendron, MD (c), Department of Family Medicine and Emergency  
10 Medicine, Faculty of Medicine and Health Sciences, Université de Sherbrooke,  
11 Saguenay, Canada  
12  
13  
14

15  
16 Megan L. Oswick, MD (c), Department of Family Medicine and Emergency  
17 Medicine, Faculty of Medicine and Health Sciences, Université de Sherbrooke,  
18 Saguenay, Canada  
19  
20  
21

22  
23 Anaëlle Morin, MSc (c), Department of Family Medicine and Emergency  
24 Medicine, Faculty of Medicine and Health Sciences, Université de Sherbrooke,  
25 Saguenay, Canada  
26  
27

28  
29 Patricia Blanchette, RN, MSc, PhD (c), Department of Family Medicine and Emergency  
30 Medicine, Université de Sherbrooke, Saguenay, Canada  
31  
32

33  
34 Andréanne Bernier, RN, MSc, PhD (c), Department of Health Sciences, Université du  
35 Québec en Abitibi-Témiscamingue, Québec, Canada  
36  
37

38 **Word count**

39  
40 4669  
41  
42  
43  
44  
45  
46  
47  
48  
49  
50  
51  
52  
53  
54  
55  
56  
57  
58  
59  
60

## Abstract

**Objectives** The COVID-19 pandemic has led to the prioritization of teleconsultation instead of face-to-face encounters. However, teleconsultation revealed some shortcomings and undesirable effects that may counterbalance benefits. The purpose of this study is to explore perspective of patients with chronic diseases on teleconsultation in primary care. This article also proposes recommendations to provide patient-oriented and appropriate teleconsultations.

**Design** We conducted a qualitative descriptive study which explored the perception of the patients regarding teleconsultation services and the following themes: access, perceived benefits, and disadvantages, interprofessional collaboration, patient-centered approach, specific competencies of professionals, and patient's global needs and preferences.

**Setting** Six primary care clinics in three regions of Quebec

**Participants** 39 patients were interviewed by telephone, through semi-structured qualitative interviews.

**Results** Patients want to maintain teleconsultation for the post-pandemic period, as long as their recommendations are followed: be able to choose to come to the clinic if they wish to, feel that their individual and environmental characteristics are considered, feel involved in the choice of the modality of each consultation, feel that interprofessional collaboration and patient-centered approach are promoted, and to maintain the professionalism, which must not be lessened despite the remote context.

**Conclusion** Patients expressed mostly high satisfaction with teleconsultation, however several issues must be addressed. Patients do and should contribute to the implementation of teleconsultation in primary care. They wish to be frequently consulted about their preferred consultation modality, which may change over time. The patient perspective must therefore be part of the balanced implementation of optimal teleconsultation that is currently taking place.

1  
2  
3 **Keywords** Primary care, telehealth or teleconsultation, chronic disease patients, patient-  
4 centered care.  
5  
6

7  
8 **Strengths and limitations of this study**  
9

- 10  
11 • This article presents field data that reports on patients' experiences and perceptions  
12 of teleconsultation in primary care.  
13  
14 • Our partnership and patient-oriented research approach ensures that the data  
15 presented are those that emerge from patients' concerns.  
16  
17 • The patients' satisfaction high rate of with the teleconsultation could have been  
18 influenced by acquiescence and desirability emotional bias  
19  
20 • Patients' recommendations for continuing teleconsultation services perennity after  
21 COVID-19 were not differentiated by health condition, which should be taken into  
22 consideration when interpreting the results.  
23  
24  
25  
26  
27  
28  
29  
30  
31  
32  
33  
34  
35  
36  
37  
38  
39  
40  
41  
42  
43  
44  
45  
46  
47  
48  
49  
50  
51  
52  
53  
54  
55  
56  
57  
58  
59  
60

## INTRODUCTION

Since March 2020, public health measures adopted in several countries in response to the COVID-19 pandemic have led to the prioritization of teleconsultation over face-to-face services in primary care health organizations. Teleconsultation is defined as any interaction between a patient and a health care professional that takes place at a distance and uses some form of information technology (e.g., virtual approaches via videoconferencing through Zoom, Teams, and Reacts) or communication (e.g., telephone, email, SMS)<sup>1</sup>. Although teleconsultation had been used sporadically across the world, the COVID-19 health crisis led to major advances in the deployment and use of this mode of intervention in several primary care clinics<sup>2 3</sup>. These primary care clinics propose health and social services provided by general practitioners working closely with other health and social services professionals, such as nurses and social workers<sup>4</sup>. Innovations' spreading requires time sensitive key elements and it can normally take up to a decade to cross, successfully or not, the adoptions' classic five steps in real life.<sup>5</sup> Yet under pandemic time shortage the tele-consultations' broadcast was hastened, and their *promotion-to-adoption* journey most likely did not get the time to fulfill that theoretical framework. Given so, In the post-pandemic period<sup>9 10 11</sup> the use of teleconsultation faced some shortcomings and undesirable effects<sup>12-17</sup>. As such, the number of inappropriate visits to Emergency departments have reportedly increased in the province of Québec, given some teleconsultation-users patients got to have a physical exam (e.g. auscultation) ending up to the emergency room. In reality, the majority of emergency rooms' visits were related to minor problems that could have been treated by a family physician or primary care teams.<sup>18</sup>This mode of care restricts access to services for people with limited mobility, limited access to the Internet or teleconsultation tools, or low levels of digital literacy<sup>15 19</sup>. These undesirable effects may counterbalance the positive effects of teleconsultation demonstrated in the scientific literature.<sup>20</sup>,Given teleconsulting will still remain, at least in part, a regular practice of healthcare professionals and patients after the COVID-19 pandemic .<sup>1 6-8</sup> Considering the patients' perception, in regard to this

1  
2  
3 fast overview, the teleconsultation allows for a better trade-off between the high potential  
4 for improved patient experience or health and the adverse effects of this technical  
5 innovation.  
6  
7

8  
9  
10 In the past year, various recommendations have been published to support good  
11 practice in teleconsultation<sup>2 21 22</sup>. These recommendations are highly useful in supporting  
12 healthcare professionals towards proper implementation of teleconsultation in  
13 healthcare settings between a patient and a clinician from an intraprofessional and  
14 clinician-centred perspective. However, they may be considered incomplete as they do  
15 not consider the needs, preferences and general representation of patients living with  
16 chronic diseases with respect to teleconsultation. Furthermore, the tools supporting  
17 teleconsultation are built from a clinician's perspective without integrating the patient's  
18 perspective.  
19  
20  
21  
22  
23  
24  
25

26  
27 Some authors explored the factors related to a positive experience (or not) of care in  
28 teleconsultation from the perspective of patients<sup>23-28</sup> but there very few focused on  
29 patients with chronic diseases in primary care<sup>29 30</sup>. In addition, patient-led studies  
30 incorporating the concept of patient-oriented research are rare. Since few scientific  
31 recommendations have been identified on teleconsultation for professionals working in  
32 primary care clinics and considering that patients with chronic illnesses are those who  
33 consult family medicine practices most frequently<sup>31</sup>, we propose that they are in the best  
34 position to testify to the experience of teleconsultation in primary care. As the desire to  
35 sustain teleconsultation in primary care takes hold, it seems essential to incorporate the  
36 patient perspective during this rapidly accelerating phase of innovation about  
37 teleconsultation. To do so, our study, co-led by two patient-partners, has the following  
38 two objectives: 1) to explore the perspective of patients with chronic diseases on the  
39 teleconsultation offered in primary care clinics; and 2) to make general  
40 recommendations regarding the post-pandemic adequacy between the teleconsultation  
41 offer and the needs and expectations of patients with chronic diseases.  
42  
43  
44  
45  
46  
47  
48  
49  
50  
51  
52  
53  
54  
55

## 56 **METHODS**

57  
58  
59  
60



1  
2  
3 We conducted<sup>32</sup> a longitudinal qualitative descriptive study<sup>33</sup> with two data collection  
4 periods <sup>34</sup> in six primary care clinics located in three regions (metropolitan, urban and  
5 semi-urban) of Quebec, Canada. These primary care clinics are funded by public  
6 funds<sup>35</sup> being defined as family physicians group working together and in close  
7 collaboration with other health and social services professionals (e.g., registered nurses,  
8 social workers, nurse practitioners)<sup>4</sup>. Teleconsultation is offered here in a variety of  
9 modalities, including email, chat, telephone, and video through a wide variety of  
10 applications (FaceTime, Zoom, Microsoft Teams, etc.). Modalities can be used alone or  
11 in combination. Some clinics got these features belt into an electronic medical record.  
12 We have used the COREQ self-assessment grid for qualitative studies in order to report  
13 on this project accuracy and methodology <sup>36</sup>.  
14  
15  
16  
17  
18  
19  
20  
21  
22  
23

## 24 **Patient and public involvement**

25  
26 The research was co-led by two patient partners, two researchers and one decision-  
27 maker. The patient and clinical co-leaders supported the researchers in carrying out the  
28 project according to the partnership methodologies guided by the Canadian Institutes of  
29 Health Research. One of the patient co-leaders had concerns about teleconsultation in  
30 primary care and the original research idea emerged from there. Both patient co-leaders  
31 had collaborate to each step of this study and their contribution is detailed in further  
32 sections. As co-authors, they have also revised the manuscript and provided feedback  
33 to enhance it.  
34  
35  
36  
37  
38  
39  
40  
41

## 42 **Sample**

43  
44 We built a convenient sample of 49 registered patients from the Training of Trainers in  
45 Primary care (F2PL) study<sup>37</sup>, whom were assessed by phone by the patient co-leaders  
46 or by a research agent. These patients are persons living with chronic diseases who are  
47 followed by family physicians in a primary care clinic and, sometimes, in collaboration  
48 with a clinical nurse and/or a social worker. The project #2019-037 obtained ethical  
49 approval from the Centre intégré universitaire de santé et de services sociaux du  
50  
51  
52  
53  
54  
55  
56  
57  
58  
59  
60

1  
2  
3 Saguenay Lac-St-Jean and all participants provided consent to participate in the  
4 interview.  
5  
6

## 7 8 **Data collection** 9

10 A research team member first contacted patients during the first wave of the COVID-19  
11 pandemic, between March and August 2020, to ask them about their experience with  
12 teleconsultation. This initial data collection highlighted patients' needs for teleconsultation  
13 services and results had been published elsewhere<sup>34</sup>. Between February and March  
14 2021, we further explored this question by examining, among other things, patients'  
15 representations of pursuing teleconsultation, reasons for consultations conducive to  
16 teleconsultation, the impact of teleconsultation on interprofessional collaboration, as well  
17 as the use of the patient partnered care approach. We conducted semi-structured  
18 qualitative telephone interviews (Appendix 1: Interview guide) lasting approximately 30  
19 minutes in February 2021 by three research professionals (X), three graduate nursing  
20 students (X), as well as one patient co-leader (X) after a training provided by both  
21 principal co-investigators, X (junior) and X (senior). We audio recorded the interviews  
22 with the consent of the study participants. We have taken field notes during each  
23 interview to enrich data analysis.  
24  
25  
26  
27  
28  
29  
30  
31  
32  
33  
34  
35  
36

## 37 **Analysis** 38 39

40 We performed qualitative analysis according to three concurrent streams: data  
41 condensation (e.g., selection, transformation of raw data), data display (e.g., narrative  
42 text, table, matrix) and verification of conclusions (e.g., go back to field notes for each  
43 patient, discussion with the research team).<sup>33</sup> We conducted a deductive thematic  
44 analysis<sup>33</sup> of the interview data based on the themes explored by the interview guide,  
45 which are, in relation to teleconsultation: satisfaction with the services received,  
46 interprofessional collaboration, inclusion of significant relatives in care, digital literacy of  
47 patients, soft skills and attitudes of professionals, valuing experiential knowledge in  
48 shared decision making. Then, we, including a patient co-leader, determined the themes  
49  
50  
51  
52  
53  
54  
55  
56  
57  
58  
59  
60

related to the teleconsultation context. We explored the following seven themes: 1) access to primary care clinics services during a pandemic; 2) advantages and disadvantages of teleconsultation compared with face-to-face encounters; 3) interprofessional collaboration; 4) healthcare professionals' competencies specific to teleconsultation; 5) the patient partnered approach to care; 6) avenues for improving measures of patients' perceptions of their care experience<sup>38</sup>; and 7) patients' needs and preferences during a teleconsultation. All research team members had collaborated to the coding identification and to create a Microsoft Word template to display the data and organize the text for the next step of the analysis. We performed a live encoding which allows for simultaneous manual coding while still listening audio recording. This method is beneficial to preserve the participants' voice, thus empowering the process to sense the intent, context, and meaning of their words.<sup>39</sup> Patients co-leaders in this project were favoring this method over the transcript coding because they felt they understanding more of what the participants wanted to express. The interviews' encoding was made by at least two members of the research team, using the Microsoft Word software. The principal investigators (X) and patient co-leaders (X) validated all the encodings one-by-one. We had all data analyzed and the conclusions were discussed in a meeting with all members of the research team, leading the extraction of proposals and recommendations reported in the present article.

## RESULTS

### Participants

Of the 49 participants initially recruited for the F2PL study, 39 agreed to participate in the present study, six were unreachable and four declined to participate. Table 1 presents the sociodemographic characteristics of the participants and table 2 their medical and psychosocial conditions.

**Table 1: Sociodemographic characteristics of the study participants**

| Characteristics | Patients (N=39) |
|-----------------|-----------------|
|                 | n (%)           |

| <b>Sex</b>                                    |         |
|-----------------------------------------------|---------|
| Male                                          | 16 (41) |
| Female                                        | 23 (59) |
| <b>Age (mean=60.5)</b>                        |         |
| < 30                                          | 0 (0)   |
| 31-40                                         | 5 (13)  |
| 41-50                                         | 3 (8)   |
| 51-64                                         | 17 (43) |
| 65 +                                          | 14 (36) |
| <b>Marital status<sup>a</sup></b>             |         |
| Married/Common-law partner                    | 31 (80) |
| Single                                        | 3 (8)   |
| Separated/Divorced                            | 4 (10)  |
| <b>Highest level of education<sup>a</sup></b> |         |
| Primary/High school                           | 10 (25) |
| Professional/College                          | 18 (46) |
| University                                    | 10 (25) |
| <b>Employment status<sup>a</sup></b>          |         |
| Working                                       | 14 (36) |
| Work interruption                             | 7 (18)  |
| Retired                                       | 15 (38) |
| Other                                         | 2 (5)   |
| <b>Income (CAN\$)<sup>b</sup></b>             |         |
| [0 – 29 999]                                  | 7 (17)  |
| [30 000 – 59 999]                             | 14 (36) |
| [60 000 – 99 999]                             | 9 (23)  |
| ≥100 000                                      | 5 (13)  |
| <b>Location</b>                               |         |
| Metropole                                     | 10 (26) |

|                                              |         |
|----------------------------------------------|---------|
| Rural                                        | 15 (38) |
| Urban                                        | 14 (36) |
| <b>Healthcare provider</b>                   |         |
| <b>before COVID-19</b>                       |         |
| Family physician                             | 6 (15)  |
| Family physician<br>and nurse                | 16 (41) |
| Family physician<br>and social worker        | 12 (31) |
| Family physician,<br>nurse and social worker | 5 (13)  |

<sup>a</sup> Data missing for 1 patient; <sup>b</sup> Data missing for 4 patients

**Table 2: Medical and psychosocial conditions of the study participants**

| Medical and psychosocial conditions | Patients (N=39)<br>n (%) |
|-------------------------------------|--------------------------|
| <b>Type <sup>a</sup></b>            |                          |
| Diabetes                            | 13 (33)                  |
| Arterial hypertension               | 11 (28)                  |
| Personal issues                     | 6 (15)                   |
| Difficulties adapting to situations | 5 (13)                   |
| Mental health issues                | 6 (15)                   |
| Coronary artery disease (CAD)       | 5 (13)                   |
| Cancer                              | 4 (10)                   |
| Asthma                              | 3 (7.5)                  |
| Relationship issues                 | 4 (10)                   |
| Suicidal thoughts                   | 1 (2.5)                  |
| Bereavement                         | 1 (2.5)                  |

|                                       |         |
|---------------------------------------|---------|
| Chronic obstructive pulmonary disease | 1 (2.5) |
| Professional issues                   | 5 (13)  |
| Other                                 | 15 (38) |
| <b>Number of conditions</b>           |         |
| 1                                     | 18 (46) |
| 2-3                                   | 14 (36) |
| 4-5≤                                  | 7 (18)  |

<sup>a</sup> *Not mutually exclusive*

Analysis of the interview data allowed us to develop recommendations based on the perspective of the participants. Additional verbatims to support each of the findings are presented in Table 3.

**Table 3 Recommendations of patients living with chronic diseases regarding the continuity of teleconsultation after the COVID-19 pandemic**

| Recommendations                                                                                                 | Verbatims                                                                                                                                                         | Participants identification |
|-----------------------------------------------------------------------------------------------------------------|-------------------------------------------------------------------------------------------------------------------------------------------------------------------|-----------------------------|
| Considering its many advantages, the end of the pandemic must allow the continuity of teleconsultation services | <i>"I don't have a driver's license; I don't have a car. So, I don't have to travel<br/>"It suits my needs [teleconsultation], because I don't have to spend"</i> | 101-5-001                   |
| Face-to-face consultation must take precedence over teleconsultation                                            | <i>"I had sores on my face, on the phone, it was more difficult"</i>                                                                                              | 302-5-003                   |

|                                                                                                                                                                                                |                                                                                                                                                                                                                                                                                                                                                                                                                                    |                                     |
|------------------------------------------------------------------------------------------------------------------------------------------------------------------------------------------------|------------------------------------------------------------------------------------------------------------------------------------------------------------------------------------------------------------------------------------------------------------------------------------------------------------------------------------------------------------------------------------------------------------------------------------|-------------------------------------|
| when a physical examination is required                                                                                                                                                        |                                                                                                                                                                                                                                                                                                                                                                                                                                    |                                     |
| Consider the reasons for consultations and the individual and environmental characteristics of the patient to decide on the appropriateness of a face-to-face consultation or teleconsultation | <i>"Anything that has to do with social relations, when there's a lot of explaining or emotional issues...I think face-to-face would be much easier"</i><br><i>"My husband is deaf. The telephone consultation is not ideal. I absolutely have to make time to accompany my husband during phone meetings because he is not able to do it alone"</i><br><i>"I don't have internet...computers, internet, I don't know that..."</i> | 202-5-001<br>102-5-004<br>101-5-010 |
| Involve the patient in choosing the consultation mode for each encounter                                                                                                                       | <i>"In my case, I don't have a relationship with my family doctor, I don't need to have one either. I'm not looking for that. If I needed a consultation with a social worker, I'd like it to be face to face because I'm looking more for the relationship"</i>                                                                                                                                                                   | 202-5-001                           |
| Explain to the patient how the interprofessional dimension will be addressed                                                                                                                   | <i>"I don't know what the difference is between the nurse and the nutritionist"</i><br><i>"They [social worker, doctor, and nutritionist] write to each other every time I have a meeting. They know everything"</i>                                                                                                                                                                                                               | 301-5-001<br>302-5-003              |
| Intervene according to the care approach in partnership with the patient in teleconsultation                                                                                                   | <i>"My healthcare professional asks questions and is interested in my problem, I don't perceive any change in his or her approach virtually compared to when I come to the office"</i><br><i>"He [the healthcare professional] asked me for my opinion, we decided to pursue this [in teleconsultation, regarding treatment choice]"</i>                                                                                           | 202-5-007<br>301-5-006              |

---

|                                                                                                                                                                          |                                                                                                                                                                                                                                                                                                                                                                                                                                                                                                                                                              |                                   |
|--------------------------------------------------------------------------------------------------------------------------------------------------------------------------|--------------------------------------------------------------------------------------------------------------------------------------------------------------------------------------------------------------------------------------------------------------------------------------------------------------------------------------------------------------------------------------------------------------------------------------------------------------------------------------------------------------------------------------------------------------|-----------------------------------|
| <p>The positive attitudes expressed by healthcare professionals in a face-to-face setting must be maintained and perceived by patients in a teleconsultation setting</p> | <p><i>"I had the impression that there was more time to listen to me. The first question was, «How are you»? It was in a calm way. On the phone, it's even more important, I find, because you don't see the person "</i></p> <p><i>"Five to ten minutes late is acceptable to me. If it's longer than that, I would like to be notified. My doctor was about 30, 40 minutes late. I was at my office, doing paperwork while waiting for my teleconsultation, so it wasn't a problem, but for people who do not have a desk job it can be a problem"</i></p> | <p>202-5-005</p> <p>201-5-001</p> |
|--------------------------------------------------------------------------------------------------------------------------------------------------------------------------|--------------------------------------------------------------------------------------------------------------------------------------------------------------------------------------------------------------------------------------------------------------------------------------------------------------------------------------------------------------------------------------------------------------------------------------------------------------------------------------------------------------------------------------------------------------|-----------------------------------|

---

## Findings

Through this unique perspective of experiential knowledge, we aim to promote the continuity and adequacy of teleconsultation services offered in primary care clinics following the pandemic (Appendix 2: Patients' 10 recommendations for continued teleconsultation after the pandemic).

*1- Considering its many advantages, the end of the pandemic must allow the improved continuity of teleconsultation services*

According to the participants, teleconsultation brings its own set of benefits. As expressed by the patients interviewed, the savings in time and money are significant for routine clinical follow-up needs. In addition to the financial aspect, teleconsultation is also advantageous from an organizational point of view since it saves time. One patient mentioned that a teleconsultation lasting approximately fifteen minutes, saves him quadruple and more the time. This patient explained that the absence of travel allowed him to spend less time on his consultation in a primary care clinic. In addition, many patients reported not having to ask their employer to be released from work, not having



1  
2  
3 to deal with unexpected road conditions (traffic jams, winter driving), losing time to find a  
4 parking space and waiting several minutes in a waiting room. For patients with young  
5 children or other family responsibilities, teleconsultation facilitates family logistics.  
6  
7 However, this desired continuity must be accompanied by a review of the adverse  
8 effects of consultation. For example, teleconsultation must not delay the consultation  
9 process to emergency services or minimize the importance of interprofessional  
10 collaboration.  
11  
12  
13  
14  
15

16  
17 *2- Face-to-face consultation must take precedence over teleconsultation when a*  
18 *physical examination is required*  
19

20  
21 During the pandemic period, some patients received teleconsultation services for which  
22 they would have preferred to be seen in person and for which certain concerns persisted  
23 after the meeting: "By telephone, it wasn't easy, I would have liked the doctor to look at  
24 my knee, she asked me if it was swollen. I couldn't see if it was swollen" (pt # 202-5-  
25 007). If a patient has a health condition that requires visual examination or auscultation  
26 by the clinician, an in-person consultation should be encouraged.  
27  
28  
29  
30  
31  
32

33  
34 *3- Consider the reasons for consultations and the individual and environmental*  
35 *characteristics of the patient to decide on the appropriateness of a face-to-face*  
36 *consultation or teleconsultation*  
37  
38  
39

40 The patient's reason for consultation must be considered when making the decision to  
41 offer a face-to-face or remote encounter. Indeed, certain reasons for consultation make  
42 patients uncomfortable when they must discuss them during a teleconsultation, such as  
43 consulting for a mental health-related reason or for one that has emotional components.  
44 For example, addressing weight gain over the phone can be difficult for some patients: "I  
45 gained weight, but I don't want to talk about my weight. I gained weight but she the  
46 doctor didn't see me. It's something that affects me too much to talk about on the phone"  
47 (Pt # 202-5-007). When dealing with potentially sensitive issues for patients, a face-to-  
48 face meeting should be preferred. The reasons for consultation reported by the patients  
49  
50  
51  
52  
53  
54  
55  
56  
57  
58  
59  
60

1  
2  
3 and which lend themselves well to teleconsultation include: the follow-up of stable  
4 chronic conditions, the transmission of test results when they announce good news, or  
5 the renewal of prescriptions. These verbatims capture the possible motives: "When the  
6 results are nothing serious, give them to me by phone..." (Pt # 302-5-005). "It can be  
7 done in teleconsultation if it's just to renew, there's no problem" (Pt # 301-5-002).  
8  
9  
10  
11  
12

13 Individual characteristics must also be considered when deciding on the best  
14 consultation mode. In some situations, individual characteristics such as deafness make  
15 it impossible to offer teleconsultation services. Similarly, there are environmental  
16 characteristics that hinder patients' teleconsultation experience. Some patients have  
17 limited access to communication services such as the Internet and telephone. This is the  
18 case for the following participant: "My mother lives in a seniors' residence. The phones  
19 are connected to the Internet, if the power is down, the phone is not available" (Pt # 102-  
20 5-004).  
21  
22  
23  
24  
25  
26  
27  
28

#### 29 *4- Involve the patient in choosing the consultation mode for each encounter*

30

31 The patient expresses personal preferences regarding the choice of teleconsultation or  
32 face-to-face mode. The patient expresses preferences depending on the type of  
33 professional services needed and their preferences change over time. For example, one  
34 patient expressed her needs as follows: "My needs have changed since the beginning of  
35 the pandemic last year. Before, I would have preferred to have a video-conference  
36 meeting, now the telephone meets my needs ... we just got used to the telephone and  
37 it's okay" (Pt # 302-5-003).  
38  
39  
40  
41  
42  
43  
44

#### 45 *5- Explain to the patient how the interprofessional dimension will be addressed*

46

47 Communication between professionals is associated with a positive care experience for  
48 patients: "I feel that there is a whole multidisciplinary team and that they don't hesitate to  
49 talk to each other, that they know each other's strengths" (Pt # 201-5-005). Patients  
50 appreciate when the collaboration between professionals is carried out in the same way  
51 as during a face-to-face meeting: "I had the impression that they were more available  
52  
53  
54  
55  
56  
57  
58  
59  
60

1  
2  
3 [with the use of technology]. When my doctor isn't available, the super nurse meets with  
4 me. That works for me" (Pt # 202-5-005).

5  
6  
7  
8 *6- Intervene according to the care approach in partnership with the patient in*  
9 *teleconsultation*

10  
11 In the patient partnered approach to care, the patient is an active participant in the  
12 meetings and must feel being listened by the healthcare professional to express their  
13 needs<sup>40</sup>. However, some patients felt that the teleconsultation did not allow them to  
14 express all their needs: "It's hard to talk on the phone, I have less chit-chat than face to  
15 face" (Pt # 302-5-005). Yet participants emphasized the value of their experiential  
16 knowledge, which they have acquired over time. This specific knowledge must be  
17 considered by the professional, including in the context of teleconsultation. The following  
18 example about the pain felt by a patient is telling: "If I have problems because of  
19 chemotherapy, I am the one who has the pain, I am the pain specialist. If it's not strong  
20 enough, I'll tell my doctor, but they know how far I can go, I don't know that..." (Pt # 301-  
21 5-003).  
22  
23  
24  
25  
26  
27  
28  
29  
30  
31  
32

33  
34 *7- The positive attitudes expressed by healthcare professionals in a face-to-face setting*  
35 *must be maintained and perceived by patients in a teleconsultation setting*  
36  
37

38 Despite the distance, the patient feels an eventual lack of professionalism in  
39 teleconsultation. Patients interviewed found important to feel the availability and  
40 attentiveness of the professional in teleconsultation. Similarly, punctuality is a  
41 professional attitude that is important to the care experience: "I find it important that the  
42 professional is on time for the teleconsultation meeting" (Pt # 201-5-001).  
43  
44  
45  
46  
47

48 Patients named other important professional attitudes to be maintained by professionals  
49 during teleconsultation, namely: empathy, trust, consideration, the feeling that the  
50 professional has knowledge related to his or her field of practice, communication  
51 (especially for follow-up information) and the preparation of the professional before an  
52 encounter. This verbatim excerpt supports the importance of professional attitudes: "I  
53  
54  
55  
56  
57  
58  
59  
60

1  
2  
3 find it important to know that the professional knows my case. There are doctors who  
4 ask why did you come?... Look in my medical record" (Pt # 102-5-006).  
5  
6

7  
8 Patients underlined the risk that technological mediation may be the gateway to fewer  
9 professional attitudes: "Sometimes I would hear him cleaning his house at the same  
10 time as his consultation, doing his dishes and then going to make himself a little  
11 supper... I even heard a toilet flush during my appointment [...]" (Pt # 101-5-003).  
12  
13  
14  
15

## 16 DISCUSSION

17  
18 The data collected at two points in time during phases 1 (February to July 2020) and 3  
19 (March to July 2021)<sup>41</sup> of the pandemic allowed us to identify the expectations of  
20 patients with chronic diseases regarding the teleconsultation services offered in primary  
21 care clinics. First, patients mentioned several advantages related to teleconsultation.  
22 They state the relevance of maintaining teleconsultation after the health crisis caused by  
23 COVID-19. However, patients' characteristics must be known and considered to decide  
24 on the best meeting mode for them. Despite the distance imposed by the change in  
25 service provision related to COVID-19, patients must be able to express their  
26 preferences and maintain their ability to participate in healthcare decisions that affect  
27 them. Interprofessional collaboration and a partnership approach to care with the patient  
28 must remain at the heart of professional teleconsultation practices. Moreover, they must  
29 be explicit despite the teleconsultation. Finally, certain attitudes expressed by healthcare  
30 professionals must be felt and perceived by the patient during the consultation. These  
31 results have allowed us to identify general recommendations from the patients'  
32 perspective, which are explained below.  
33  
34  
35  
36  
37  
38  
39  
40  
41  
42  
43  
44  
45  
46

47 We found patients' overall positive assessment of teleconsultation. This observation is  
48 consistent with the literature<sup>42</sup>. Our results corroborate what Ramaswamy & al (2020)<sup>43</sup>  
49 reported from a cohort study of 40,000 patients that teleconsultation is associated with  
50 higher patient satisfaction compared with face-to-face visits. Our study adds to these  
51 data and demonstrates that this principled adherence is conditional on meeting key  
52  
53  
54  
55  
56  
57  
58  
59  
60

1  
2  
3 conditions recognized by patients. Patient satisfaction is partly explained by the  
4 pragmatic efficiency of teleconsultation, such as time saving, money saving and the  
5 impact on daily life of a short consultation for the professional. In addition, the perception  
6 of faster access to healthcare professionals is highly valued. These efficiency indicators  
7 from the users' point of view are often cited by patients and associated with a positive  
8 experience of care for them<sup>38</sup>. Similarly, as mentioned by Schaller et al. (2021)<sup>44</sup>, the  
9 digitization of practices, as accelerated by the pandemic, is a modality that will endure in  
10 the post-pandemic period. We believe, however, that this potential for sustainability has  
11 conditions for improvement and success, and that the patient's perspective in identifying  
12 these is very useful.

13  
14 From the patient's perspective, teleconsultation should not be used systematically,  
15 despite its great potential. Certain reasons of consultation and individual and  
16 environmental characteristics make teleconsultation inappropriate and must, therefore,  
17 be considered when choosing the best consultation mode. The patient must be  
18 considered as a key partner in the analysis of these reasons for each situation where  
19 teleconsultation is potentially useful<sup>45</sup>, as corroborated by the data in this study.

20  
21 According to an evaluation report of an healthcare organization<sup>20</sup> and in accordance with  
22 the recommendations of a medical association<sup>45</sup>, the need to perform a physical or  
23 psychological examination is a reason for consultation that is not compatible with  
24 teleconsultation, due to the possible risks for patients. Some health conditions, co-  
25 morbidities or multiple chronic diseases may also affect the patient's ability to benefit  
26 from teleconsultation services<sup>21</sup>. This is the case for patients with advanced age,  
27 cognitive impairments, and severe mental health problems<sup>9 20 45</sup>. Issues related to  
28 mental health and teleconsultation have been raised by primary care nurses who have  
29 expressed unease in using technology with clients with mental or psychosocial  
30 problems<sup>10</sup>.

31  
32 Teleconsultation can also be a source of health inequity. A study by Khoong et al  
33 (2021)<sup>46</sup> found that the most significant barrier to teleconsultation is limited access to the

1  
2  
3  
4 Internet and mobile data. Internet costs and digital literacy are therefore factors that may  
5 be limiting for some patients and hinder the provision of teleconsultation services. In  
6 order to determine the best consultation mode, the French Haute Autorité de la santé<sup>47</sup>  
7 mentions that the professionals must ensure the patient's eligibility for such a  
8 teleconsultation mode by considering several factors, such as the clinical situation, the  
9 ability to communicate at a distance, individual factors (physical, psychological, socio-  
10 professional, family), confidentiality at a distance, and the nature of the care (e.g.,  
11 physical contact necessary). However, we believe that this analysis must be done in  
12 partnership with the patient. The latter has a unique experiential knowledge acquired  
13 over time through daily experience with the health condition. The benefits and limitations  
14 of teleconsultation should be known to the patient. This is part of a collaborative care  
15 approach with the patient which is designed to ensure that decisions are made with the  
16 patient's needs and preferences in mind.  
17  
18  
19  
20  
21  
22  
23  
24  
25  
26  
27

28  
29 Some patients reported a lack of communication between healthcare professionals  
30 during teleconsultation. Patients had to repeat their needs and health history to each  
31 healthcare professional involved so that everyone was aware of their situation. This  
32 negatively impacts the patient's experience of care<sup>38</sup>. According to the literature review  
33 by Graves and Doucet (2016)<sup>48</sup>, there are several barriers to interprofessional  
34 collaboration to consider in teleconsultation. These include technical issues caused by  
35 technology, as well as coordination and organizational challenges, such as ambiguous  
36 responsibilities or increased workload caused by teleconsultation. Similarly, difficult  
37 relationships between professionals, marked by a lack of trust and tension, have a  
38 negative impact on teleconsultation collaboration within the team<sup>49</sup>. In addition, the  
39 technology used can have a mono-disciplinary silo effect if it promotes solo (clinician-  
40 patient) meetings that replace formal and informal consultation between clinicians<sup>16 50</sup>. If  
41 teleconsultation meetings are to be maintained over time, it seems appropriate to equip  
42 professionals with the skills needed for interprofessional collaboration at a distance<sup>51</sup>.  
43  
44  
45  
46  
47  
48  
49  
50  
51  
52  
53  
54  
55  
56  
57  
58  
59  
60

1  
2  
3  
4 Some patients reported feeling less comfortable expressing their needs in  
5 teleconsultation. As a result, encounters are quicker, colder, more informal, or even  
6 incomplete. The partnership approach to care with the patient must remain central even  
7 in the teleconsultation context. In this regard, the family member can also be consulted  
8 for decision-making purposes, if the patient so wishes<sup>3</sup>. One study has shown that  
9 teleconsultation encounters are more likely to reproduce a paternalistic approach to  
10 care, where the professional speaks more and controls the dialogue, while the patient  
11 has a more passive role<sup>52</sup>. Schaller & al.<sup>44</sup> mention that the patient must be the  
12 conductor of his or her care pathway, even in teleconsultation. This implies access to  
13 quality, useful and understandable information from healthcare professionals.  
14  
15  
16  
17  
18  
19  
20  
21  
22

23 Based on data collected in this study, we believe that the rapid adoption of  
24 teleconsultation in response to the healthcare measures imposed by pandemic crisis  
25 may have hindered the implementation of the patient centered approach. Indeed,  
26 professionals had to adapt quickly, adding the additional burden of the health crisis,  
27 which may have had an impact on their well-being and mental health<sup>10 53</sup>. In addition,  
28 technologies used were not always mature enough to support intelligent  
29 teleconsultation, such as appointment scheduling, clinical record information and  
30 teleconsultation itself. The telephone often served as the teleconsultation technology,  
31 which fell far short of the capabilities of the best available technology devices<sup>54</sup>. A post-  
32 pandemic routinization will therefore need to go beyond the telephone mode and rely on  
33 technological development commensurate with scientific and patient recommendations.  
34 We assume that the technological delay has had an impact on the adoption of good  
35 practices. It is therefore recommended to ensure that the patient has full access to  
36 information as well as the required technology supplies.  
37  
38  
39  
40  
41  
42  
43  
44  
45  
46  
47  
48  
49

50 Patients named several professional qualities and attitudes associated with a positive  
51 teleconsultation care experience. Many patients reported that a first encounter with a  
52 professional remotely makes them more uncomfortable. To this end, according to the  
53 literature review by Graves and Doucet (2016)<sup>48</sup>, the importance of creating a  
54  
55  
56  
57  
58  
59  
60



1  
2  
3 relationship of trust between the professional and the patient is emphasized. This is  
4 created through quality communication and the experience of mutual understanding.  
5  
6 The first visit with the patient should be face-to-face, to help build trust.  
7  
8

9  
10 This study has some limitations that need to be discussed. The patients' satisfaction  
11 high rate of with the teleconsultation could have been influenced by acquiescence and  
12 desirability emotional bias. Although questions were non-directional and neutrally  
13 framed, measuring patient satisfaction can be challenging<sup>55 56</sup> and some patient may  
14 have reported being more satisfaction than they actually got. Patients' recommendations  
15 for continuing teleconsultation services perennity after COVID-19 were not differentiated  
16 by health condition, which should be taken into consideration when interpreting the  
17 results. These must also be adapted and tailored to other contexts or patients with other  
18 health condition. The results obtained are related to the Quebec teleconsultation reality,  
19 so projection to other contexts may be limited. Several factors such as teleconsulting  
20 tools, the type of technologies,<sup>57</sup> and their integration to electronic medical records, as  
21 well as their shared costs, may influence the patients' satisfaction.<sup>58 59</sup> Given the  
22 patients were already part of a research study, they were not recruited based on their  
23 teleconsultation experiences. Therefore, although they may have had teleconsultation  
24 experiences during the study period, that could have been melt other health care  
25 experiences leading to a lower robustness of our data.  
26  
27  
28  
29  
30  
31  
32  
33  
34  
35  
36  
37  
38  
39

## 40 CONCLUSION

41  
42  
43 The strict resumption of face-to-face clinical activities in primary care services, including  
44 the primary care clinics, would contribute to slowing down the modernization of services  
45 while risking a negative impact on the patient's experience of care. Indeed, patients  
46 perceive several benefits associated with teleconsultation and believe that it should be  
47 maintained in the post-pandemic period. However, teleconsultation should always be a  
48 win-win situation for both the patient and the clinician, ensuring that the patient is  
49 comfortable with it, and for each consultation. It is essential to take the time needed to  
50 effectively implement teleconsultation in primary care, particularly by highlighting the  
51  
52  
53  
54  
55  
56  
57  
58  
59



1  
2  
3 good practices of professionals to keep this encounter mode in line with patients' needs.  
4  
5 We must emphasize the importance of documenting the adverse effects of imperfect  
6  
7 teleconsultation to correct them quickly before it becomes routinized and bad behaviors  
8  
9 crystallize. Finally, healthcare systems have gone through a technological advancement  
10  
11 precipitated by the pandemic crisis and the integration of the patient experience has  
12  
13 often been sidelined. The experiential knowledge of patients makes them credible and  
14  
15 indispensable actors in the improvement of health care and services. The patient  
16  
17 perspective must therefore be part of the balanced implementation of optimal  
18  
19 teleconsultation that is currently taking place.  
20  
21  
22

### 23 **Conflict of interest statements**

24 The authors declare having no potential conflicts of interest with respect to the research,  
25  
26 authorship and/or publication of this article. Also, no financial interest or benefit arisen  
27  
28 from the direct application of this study.  
29  
30

### 31 **Funding statement**

32  
33 This work was supported by the Fonds de Recherche du Québec en Santé under Grant  
34  
35 number PCIBL-2.  
36  
37

### 38 **Acknowledgments**

39  
40 The authors would like to thank all the participants for their valuable contribution to this  
41  
42 research, Daniel-Constantin Manolescu for reviewing part of the manuscript, and  
43  
44 Priscilla Beaupré and Amélie Boudreault for their help in collecting the data. Marie-Eve  
45  
46 Poitras (junior) received a Research Career Scholar from the Fond de la recherche du  
47  
48 Québec en santé (FRQS) and holds an academic chair of the Université de Sherbrooke  
49  
50 on Optimal Professional Practices in Primary Care. This study was financially supported  
51  
52 by the Fonds de recherche en Santé du Québec (FRQS), Grant number PCIBL-2.  
53

### 54 **Author contributions**

55  
56  
57  
58  
59  
60

1  
2  
3 MEP, YC, MDP, GG, and SM contributed to the conception and design of the study. CC,  
4 GG, MDP, AG, MO, AM, PB and AB collected the data and conducted interviews. CC,  
5 MDP, MEP, YC and VTV performed the coding and thematic analysis and interpretation  
6 of the results. VTV and CC wrote the draft of the manuscript and all authors commented  
7 on previous versions of the manuscript. All authors read and approved the final  
8 manuscript.  
9  
10  
11  
12  
13  
14

### 15 **Ethics approval**

16 The study (project #2019-037) obtained ethical approval from the Centre intégré  
17 universitaire de santé et de services sociaux du Saguenay Lac-St-Jean and all  
18 participants provided consent to participate.  
19  
20  
21  
22  
23  
24

### 25 **Data Sharing Statement**

26 Unpublished data can be accessed by contacting the corresponding author.  
27  
28  
29  
30  
31  
32  
33  
34  
35  
36  
37  
38  
39  
40  
41  
42  
43  
44  
45  
46  
47  
48  
49  
50  
51  
52  
53  
54  
55  
56  
57  
58  
59  
60

## References

1. Lemire F, Sisler J. L'intégration des soins virtuels en médecine de famille. *Canadian Family Physician* 2020;66(2):151-51.
2. Centre intégré de santé et de services sociaux de la Gaspésie. Guide de soutien en télésanté, lignes directrices et bonnes pratiques 2020 [Available from: <https://www.ciass-gaspesie.gouv.qc.ca/wp-content/uploads/2020/11/Guide-bonnes-pratiques-telesante-CIASS-Gaspesie-Novembre-2020.pdf>].
3. Ministère de la Santé et des Services Sociaux. Utilisation de la télésanté en vertu du décret d'urgence sanitaire 2021 [Available from: <https://publications.msss.gouv.qc.ca/msss/fichiers/2021/21-915-01W.pdf>].
4. Gouvernement du Québec. Groupe de médecine de famille (GMF), groupe de médecine de famille universitaire (GMF-U) et super-clinique. 2021
5. Rogers EM. Diffusion of innovations 5th ed. New York: Free Press of Glencoe 2003:576.
6. Association médicale canadienne. Virtual care in Canada : Discussion paper. CMA health summit, 2019:24.
7. Editorial. Telehealth is here to stay. *Nature Medicine* 2021;27(7):1121-21. doi: 10.1038/s41591-021-01447-x
8. Mason R FTC. Telehealth is here to stay - Long after the pandemic. *Forbes* 2021 November 2.
9. Breton M, Hudon, Catherine, . La première vague de Covid-19 au Québec et les soins primaires. *Rev Med Suisse* 2020
10. Carrier J, Poitras, ME., Girard, A., Lesage, A., Cormier, C., & Berbiche, D. Outpatient follow-up practices and the well-being of primary care and mental health nurses during the first wave of the COVID-19 pandemic: A cross-sectional survey. *International journal of Nursing Studies* 2021
11. Unité d'évaluation médicale du CHRU de Nancy. Partenariat de soins. L'accès aux soins à distance & COVID 19 | Retours d'expériences des patients et professionnels de santé. Newsletter des patients partenaires du CHRU de Nancy/septembre2020 [Available from: [www.chu-nancy.fr/images/patients\\_partenaires\\_newsletter\\_02.pdf](http://www.chu-nancy.fr/images/patients_partenaires_newsletter_02.pdf)].
12. Isautier JM, Copp T, Ayre J, et al. People's Experiences and Satisfaction With Telehealth During the COVID-19 Pandemic in Australia: Cross-Sectional Survey Study. *Journal of medical Internet research* 2020;22(12):e24531. doi: 10.2196/24531 [published Online First: 2020/11/07]
13. Breton M, Sullivan E. E, Deville-Stoetzel N, et al. Telehealth challenges during COVID-19 as reported by primary healthcare physicians in Quebec and Massachusetts. *BMC family practice* 2021;22(1):192. doi: 10.1186/s12875-021-01543-4 [published Online First: 2021/09/27]
14. Foster MV, Sethares KA. Facilitators and barriers to the adoption of telehealth in older adults: an integrative review. *CIN: Computers, Informatics, Nursing* 2014;32(11):523-33.
15. Lopez AM, Lam K, Thota R. Barriers and Facilitators to Telemedicine: Can You Hear Me Now? *American Society of Clinical Oncology Educational Book* 2021(41):25-36. doi: 10.1200/edbk\_320827

16. Hardcastle L, Ogbogu U. Virtual care: Enhancing access or harming care? *Healthc Manage Forum* 2020;33(6):288-92. doi: 10.1177/0840470420938818 [published Online First: 2020/07/21]
17. Waseem N, Boulanger M, Yanek LR, et al. Disparities in Telemedicine Success and Their Association With Adverse Outcomes in Patients With Thoracic Cancer During the COVID-19 Pandemic. *JAMA Network Open* 2022;5(7):e2220543-e43. doi: 10.1001/jamanetworkopen.2022.20543
18. Le Journal de Montréal. La télémédecine augmente les consultations aux urgences 2021 [Available from: <https://www.journaldemontreal.com/2021/04/25/la-telemedecine-augmente-les-consultations-aux-urgences-1>].
19. Indexsanté. Télémédecine : avantages et inconvénients 2020 [Available from: <https://www.indexsante.ca/chroniques/634/telemedecine-avantages-et-inconvenients.php>].
20. Unité d'évaluation des technologies et des modes d'intervention en santé et en services sociaux. Évaluation exploratoire de la pertinence, de l'utilité et des impacts des téléconsultations 2020 [Available from: [https://iucpq.qc.ca/sites/default/files/rapport\\_etmis\\_telesante\\_iucpq-ciusss\\_estrie\\_chus\\_09-2020.pdf](https://iucpq.qc.ca/sites/default/files/rapport_etmis_telesante_iucpq-ciusss_estrie_chus_09-2020.pdf)].
21. Collège des médecins du Québec. Les téléconsultations réalisées par les médecins durant la pandémie de COVID-19 2020 [Available from: <http://www.cmq.org/publications-pdf/p-1-2020-03-31-fr-les-teleconsultations-realisees-par-les-medecins-durant-la-pandemie-de-covid-19.pdf>].
22. Gouvernement du Québec. Coffre à outils pour le professionnel de la santé 2020 [Available from: <https://telesantequebec.ca/aide-et-soutien/coffre-a-outils-pour-le-professionnel-en-telesante/>].
23. Ahmad F, Wysocki RW, Fernandez JJ, et al. Patient Perspectives on Telemedicine During the COVID-19 Pandemic. *Hand (New York, NY)* 2021;15589447211030692. doi: 10.1177/15589447211030692 [published Online First: 2021/09/14]
24. Bodine CD, Das DG, Haywood K, et al. Barriers to telehealth: The patient perspective. *Journal of Clinical Oncology* 2020;38(29\_suppl):266-66. doi: 10.1200/JCO.2020.38.29\_suppl.266
25. Ramaswamy A, Yu M, Drangsholt S, et al. Patient Satisfaction With Telemedicine During the COVID-19 Pandemic: Retrospective Cohort Study. *Journal of medical Internet research* 2020;22(9):e20786. doi: 10.2196/20786 [published Online First: 9.9.2020]
26. David J. Kirby JWF, Daniel B. Buchalter, Michael J. Moses, Eoghan T. Hurly, Dennis A. Cardone, S. Steven Yang, Mandeep S. Virk, Andrew S. Rokito, Laith M. Jazrawi, and Kirk A. Campbell. Patient and Physician Satisfaction with Telehealth During the COVID-19 Pandemic: Sports Medicine Perspective. *Telemedicine and e-Health* 2021;27(10):1151-59. doi: 10.1089/tmj.2020.0387
27. Hoyt K, Reynolds A. The Patient Perspective on Telemedicine. *Clinical Liver Disease*;n/a(n/a) doi: <https://doi.org/10.1002/cld.1188>
28. Ladin K, Porteny T, Perugini JM, et al. Perceptions of Telehealth vs In-Person Visits Among Older Adults With Advanced Kidney Disease, Care Partners, and Clinicians. *JAMA Network Open* 2021;4(12):e2137193-e93. doi: 10.1001/jamanetworkopen.2021.37193

- 1
- 2
- 3 29. Hiratsuka V, Delafield R, Starks H, et al. Patient and provider perspectives on using
- 4 telemedicine for chronic disease management among Native Hawaiian and Alaska Native
- 5 people. *International journal of circumpolar health* 2013;72 doi:
- 6 10.3402/ijch.v72i0.21401 [published Online First: 2013/08/27]
- 7
- 8 30. Omboni S, Ballatore T, Rizzi F, et al. Telehealth at scale can improve chronic disease
- 9 management in the community during a pandemic: An experience at the time of COVID-
- 10 19. *PLOS ONE* 2021;16(9):e0258015. doi: 10.1371/journal.pone.0258015
- 11
- 12 31. Fortin M, Bravo G, Hudon C, et al. Prevalence of Multimorbidity Among Adults Seen in
- 13 Family Practice. *The Annals of Family Medicine* 2005;3(3):223. doi: 10.1370/afm.272
- 14
- 15 32. Parry David SJ, Macaulay C. Ann, . Guide sur la collaboration entre les chercheurs et les
- 16 utilisateurs des connaissances dans la recherche en santé 2015 [Available from:
- 17 <https://cihr-irsc.gc.ca/f/44954.html>].
- 18
- 19 33. Miles MB, Huberman AM, Saldana J. Qualitative data analysis: A methods sourcebook. 2014
- 20
- 21 34. Poitras M-E. Chronic disease patients' experience with telehealth interventions and self-care
- 22 strategies during the first wave of the COVID-19 pandemic. 2021
- 23
- 24 35. Breton M, Lévesque JF, Pineault R, et al. Primary Care Reform: Can Quebec's Family
- 25 Medicine Group Model Benefit from the Experience of Ontario's Family Health Teams?
- 26 *Healthcare policy = Politiques de sante* 2011;7(2):e122-35. [published Online First:
- 27 2012/11/02]
- 28
- 29 36. Tong A, Sainsbury P, Craig J. Consolidated criteria for reporting qualitative research
- 30 (COREQ): a 32-item checklist for interviews and focus groups. *International Journal for*
- 31 *Quality in Health Care* 2007;19(6):349-57. doi: 10.1093/intqhc/mzm042
- 32
- 33 37. Poitras M-E MS, Couturier Y, Gagnon D, Duhoux A, Gaboury I, Doucet E, T Vaillancourt V, Ben
- 34 Charif A, Ramond-Roquin A, Gauthier G, Poirier M-D, Lukewich J, Careau E, Ashcroft R,
- 35 Delli Colli N, Hudon C. Co-design, implementation, and evaluation of an expanded train-
- 36 the- trainer strategy to support the sustainability of evidence-based practice guides for
- 37 family practice nurses and social workers in primary care clinic: A developmental
- 38 evaluation protocol. *BMC family practice* 2022;23(84) doi:
- 39 <https://doi.org/10.1186/s12875-022-01684-0>
- 40
- 41 38. Organisation for Economic Co-operation and Development. PaRIS survey of Patients with
- 42 Chronic Conditions 2019 [Available from: [https://www.oecd.org/health/health-](https://www.oecd.org/health/health-systems/PaRIS-survey-Patients-with-Chronic-Conditions-June-2019.pdf)
- 43 [systems/PaRIS-survey-Patients-with-Chronic-Conditions-June-2019.pdf](https://www.oecd.org/health/health-systems/PaRIS-survey-Patients-with-Chronic-Conditions-June-2019.pdf)].
- 44
- 45 39. Parameswaran UD, Ozawa-Kirk JL, Latendresse G. To live (code) or to not: A new method for
- 46 coding in qualitative research. *Qualitative Social Work* 2020;19(4):630-44. doi:
- 47 10.1177/1473325019840394
- 48
- 49 40. Le collège des médecins de famille du Canada. Soins centrés sur le patient dans les centres
- 50 de médecine de famille 2014 [Available from:
- 51 [https://patientsmedicalhome.ca/files/uploads/BA\\_PatCentre\\_FRE\\_Oct.10.2014\\_FINAL.p](https://patientsmedicalhome.ca/files/uploads/BA_PatCentre_FRE_Oct.10.2014_FINAL.pdf)
- 52 [df](https://patientsmedicalhome.ca/files/uploads/BA_PatCentre_FRE_Oct.10.2014_FINAL.pdf)].
- 53
- 54 41. Institut national de santé publique du Québec. Ligne du temps COVID-19 au Québec 2022
- 55 [Available from: <https://www.inspq.qc.ca/covid-19/donnees/ligne-du-temps>].
- 56
- 57 42. Flodgren G, Rachas A, Farmer AJ, et al. Interactive telemedicine: effects on professional
- 58 practice and health care outcomes. *Cochrane Database of Systematic Reviews* 2015(9)
- 59
- 60

- 1  
2  
3 43. Ramaswamy A, Yu M, Drangsholt S, et al. Patient Satisfaction With Telemedicine During the  
4 COVID-19 Pandemic: Retrospective Cohort Study. *J Med Internet Res* 2020;22(9):e20786-  
5 e86. doi: 10.2196/20786  
6  
7 44. Schaller P, Kherad O, Jaunin-Stadler N, et al. Centre de santé de soins primaires: à quoi  
8 ressemblera-t-il dans le futur? *Revue médicale suisse* 2021;17(738):934-38.  
9  
10 45. Collège des médecins du Québec. Rencontre en personne ou téléconsultation : comment  
11 trancher? 2021 [Available from: [http://www.cmq.org/publications-pdf/p-1-2021-02-18-](http://www.cmq.org/publications-pdf/p-1-2021-02-18-fr-rencontre-en-personne-teleconsultation-comment-trancher.pdf?t=1639497647477)  
12 [fr-rencontre-en-personne-teleconsultation-comment-trancher.pdf?t=1639497647477](http://www.cmq.org/publications-pdf/p-1-2021-02-18-fr-rencontre-en-personne-teleconsultation-comment-trancher.pdf?t=1639497647477).  
13  
14 46. Khoong EC, Butler BA, Mesina O, et al. Patient interest in and barriers to telemedicine video  
15 visits in a multilingual urban safety-net system. *Journal of the American Medical*  
16 *Informatics Association* 2021;28(2):349-53.  
17  
18 47. Haute Autorité de Santé. Réponses rapides dans le cadre du COVID-19 -Téléconsultation et  
19 télésoin 2020 [Available from: [https://www.has-sante.fr/jcms/p\\_3168867/fr/reponses-](https://www.has-sante.fr/jcms/p_3168867/fr/reponses-rapides-dans-le-cadre-du-covid-19-teleconsultation-et-telesoin)  
20 [rapides-dans-le-cadre-du-covid-19-teleconsultation-et-telesoin](https://www.has-sante.fr/jcms/p_3168867/fr/reponses-rapides-dans-le-cadre-du-covid-19-teleconsultation-et-telesoin).  
21  
22 48. Graves M, Doucet S. Factors affecting interprofessional collaboration when communicating  
23 through the use of information and communication technologies: a literature review.  
24 *Journal of Research in Interprofessional Practice and Education* 2016;6(2)  
25  
26 49. Donnelly C, Ashcroft R, Bobbette N, et al. Interprofessional primary care during COVID-19: a  
27 survey of the provider perspective. *BMC family practice* 2021;22(1):31. doi:  
28 10.1186/s12875-020-01366-9 [published Online First: 2021/02/05]  
29  
30 50. Wharton G. A, Sood H. S, Sissons A, et al. Virtual primary care: fragmentation or  
31 integration? *The Lancet Digital health* 2019;1(7):e330-e31. doi: 10.1016/s2589-  
32 7500(19)30152-9 [published Online First: 2020/12/17]  
33  
34 51. Poitras M-E CY, Beaupré P, Girard A, Aubry F, T Vaillancourt V, Carrier J D, Fortin L, Racine J,  
35 Morin A, Boudreault A, Cormier C. Les compétences en pratiques collaboratives  
36 interprofessionnelles des professionnels de la santé et des services sociaux en contexte  
37 virtuel : une étude de portée. *Conseil de recherches en sciences humaines du Canada*  
38 *(CRSH)* 2021  
39  
40 52. Agha Z, Roter DL, Schapira RM. An evaluation of patient-physician communication style  
41 during telemedicine consultations. *Journal of medical Internet research* 2009;11(3):e36.  
42  
43 53. Collège des médecins de famille du Canada. Soins virtuels dans le Centre de médecine de  
44 famille. Mississauga, ON, 2021:12.  
45  
46 54. Marshall EG, Breton M, Cossette B, et al. The PUPPY Study—Protocol for a Longitudinal Mixed  
47 Methods Study Exploring Problems Coordinating and Accessing Primary Care for  
48 Attached and Unattached Patients Exacerbated During the COVID-19 Pandemic Year.  
49 *medRxiv* 2021  
50  
51 55. Dunsch F, Evans DK, Macis M, et al. Bias in patient satisfaction surveys: a threat to  
52 measuring healthcare quality. *BMJ Global Health* 2018;3(2):e000694. doi:  
53 10.1136/bmjgh-2017-000694  
54  
55 56. Hays RD, Ware JE. My Medical Care Is Better Than Yours: Social Desirability and Patient  
56 Satisfaction Ratings. *Medical Care* 1986;24(6):519-25.  
57  
58 57. Fang J, Liu L, Fang P. What is the most important factor affecting patient satisfaction - a  
59 study based on gamma coefficient. *Patient preference and adherence* 2019;13:515-25.  
60 doi: 10.2147/ppa.s197015 [published Online First: 2019/05/23]

- 1  
2  
3 58. Naidu A. Factors affecting patient satisfaction and healthcare quality. *International journal*  
4 *of health care quality assurance* 2009;22(4):366-81. doi: 10.1108/09526860910964834  
5 [published Online First: 2009/09/04]  
6  
7 59. Batbaatar E, Dorjdagva J, Luvsannyam A, et al. Determinants of patient satisfaction: a  
8 systematic review. *Perspectives in Public Health* 2017;137(2):89-101. doi:  
9 10.1177/1757913916634136  
10  
11  
12  
13  
14  
15  
16  
17  
18  
19  
20  
21  
22  
23  
24  
25  
26  
27  
28  
29  
30  
31  
32  
33  
34  
35  
36  
37  
38  
39  
40  
41  
42  
43  
44  
45  
46  
47  
48  
49  
50  
51  
52  
53  
54  
55  
56  
57  
58  
59  
60

For peer review only



1  
2  
3 **Continuity of teleconsultation in primary care after the COVID-19 pandemic : The perspective of**  
4 **patients living with chronic diseases**  
5

6 **Running heading: Perspective of patients living with chronic diseases on teleconsultation**  
7

8 **The Patient**  
9

10 Marie-Eve Poitras \*, RN, PhD, Research chair on optimal professional practice in primary care,  
11 Department of Family Medicine and Emergency Medicine, Faculty of Medicine and Health  
12 Sciences, Université de Sherbrooke, Saguenay, Canada  
13

14 \*Corresponding author

15 305 Rue Saint Vallier, Chicoutimi,

16 QC G7H 5H6

17 418-541-1234, ext. 3249

18 marie-eve.poitras@usherbrooke.ca

19 ORCID: 0000-0002-3315-0190  
20  
21

22 Marie-Dominique Poirier, Patient-partner, Centre intégré universitaire de santé et de services  
23 sociaux du Saguenay-Lac-Saint-Jean, Saguenay, Canada  
24

25 Yves Couturier, PhD, Department of Social Work, Université de Sherbrooke, Sherbrooke, Canada

26 ORCID: 0000-0001-6848-8354  
27  
28

29 Vanessa T. Vaillancourt, MSc, Department of Family Medicine and Emergency Medicine, Faculty of  
30 Medicine and Health Sciences, Université de Sherbrooke, Saguenay, Canada

31 ORCID: 0000-0002-9187-2300  
32  
33

34 Caroline Cormier, M. Ps. Éd., Department of Family Medicine and Emergency Medicine, Faculty of  
35 Medicine and Health Sciences, Université de Sherbrooke, Saguenay, Canada  
36

37 Gilles Gauthier, Patient-Partner, Centre intégré universitaire de santé et de services sociaux du  
38 Saguenay Lac Saint Jean, Saguenay, Canada  
39

40 Audrey Gendron, MD (c), Department of Family Medicine and Emergency Medicine, Faculty of  
41 Medicine and Health Sciences, Université de Sherbrooke, Saguenay, Canada  
42

43 Megan L. Oswick, MD (c), Department of Family Medicine and Emergency Medicine, Faculty of  
44 Medicine and Health Sciences, Université de Sherbrooke, Saguenay, Canada  
45

46 Anaëlle Morin, MSc (c), Department of Family Medicine and Emergency Medicine, Faculty of  
47 Medicine and Health Sciences, Université de Sherbrooke, Saguenay, Canada  
48

49 Patricia Blanchette, RN, MSc, Department of Family Medicine and Emergency Medicine,  
50 Université de Sherbrooke, Saguenay, Canada  
51

52 Andréanne Bernier, MN, Department of Health Sciences, Université du Québec en Abitibi-  
53 Témiscamingue, Québec, Canada  
54  
55  
56  
57  
58  
59  
60



## Electronic Supplementary Material

### Appendices

#### Appendix 1: Interview guide for patients of FMGs, participating in the F2PL project, on their perception of an ideal remote consultation in COVID-19 times

##### INTRODUCTION

Hello MR. or MS. (NAME OF PARTICIPANT), how are you?

My name is (YOUR NAME), I am a (research agent, student or patient-researcher) on the F2PL project team.

I am part of the F2PL research project in which you are participating, which aims to better understand how professionals in FMGs respond to patient needs. You met or spoke with members of our team in the fall of 2019 or winter of 2020. Our team did a phone interview with you this summer, do you remember?

MR. or MS. (NAME OF PARTICIPANT) is this a good time to talk to you?

1. NO: Can we schedule an appointment at a time that is more convenient for you? (Schedule an appointment and let him/her know we will contact him/her then, thank him/her and hang up)
2. YES: Continue

I am calling you today to hear from you and to ask you a few questions about your perception of the care and services you have received through remote consultations since the beginning of the pandemic in your FMG (medical clinic). A remote consultation is any follow-up by a healthcare professional that did not take place face-to-face.

Our call should last about 30 minutes.

May I ask you a few questions?

May I record our call?

1. PATIENT REFUSED: No problem, thank you. Our team will contact you again when it is time for the next F2PL interview.
2. PATIENT ACCEPTS: Great, thank you very much. If you agree, I will now record the interview.

##### INTERVIEW QUESTIONS

1. First of all, I would like to know how you're doing in this particular Covid-19 pandemic period?
2. Since our last call this summer, have you consulted a healthcare professional (or assisted a loved one in a meeting) in your FMG?

1  
2  
3 \* Note, if patients talk about their doctor, let them talk, then specify for nurses or SW's.  
4 If yes: question 3  
5 If no: would you have needed a consultation? If yes or no, why? If the meeting  
6 had been possible, how would you have liked this? question 4  
7  
8  
9

10 **3. Can you tell me about your experience from the beginning?**

11 *Sub-questions:*

- 12  
13 a. What professional(s) did you meet with?  
14  
15 i. What professionals other than the physician did you meet with?  
16  
17 ii. Was this the first time you met with this professional? How long  
18 have you been followed?  
19  
20 iii. Did you repeat any information that was already known by this  
21 professional?  
22  
23 b. How was the meeting conducted (or by what means)? (e.g. video  
24 conference, call, email, texting) ...  
25  
26 i. Where were you during this meeting?  
27  
28 ii. What were your concerns about confidentiality?  
29  
30 iii. Who accompanied you to your meeting?  
31  
32 c. If it was not by video, do you wish it had been?  
33  
34 d. How did this meeting meet your needs or reason for consultation?  
35  
36 e. How did the remote encounter help or hinder your comfort in talking with  
37 the healthcare professional?  
38  
39 f. What would it take for you to be comfortable? (help with using the  
40 platforms)  
41  
42 g. Why do you think some encounters are better suited for in-person than  
43 remote consultation?  
44  
45 h. How do you see teamwork among healthcare professionals?  
46  
47 i. How do you observe them sharing information?  
48  
49 ii. Have you had any conflicting discussions with them?  
50  
51 i. Why was the teleconsultation equivalent or not in terms of quality?  
52  
53 i. What were the differences in the professional's approach?  
54  
55 ii. What issues would you have liked to discuss with your  
56 professional, but did not dare to address?  
57  
58  
59  
60

- 1  
2  
3 j. *How did you feel called upon as an expert on your health condition during*  
4 *your teleconsultation meeting?*  
5  
6 i. *How did you express your perception of the situation?*  
7  
8 ii. *How did you have time to think about the different options?*  
9  
10 iii. *How did you explore the benefits and advantages of each option?*  
11  
12 iv. *How were you able to express your personal values about*  
13 *managing your health and the choices (treatments, etc.)*  
14 *available?*  
15  
16 v. *How did they give importance to what was a priority for you?*  
17  
18 vi. *How was the involvement of your loved ones in your care*  
19 *addressed?*  
20  
21 vii. *Do you have a follow-up care plan that addresses your health*  
22 *and wellness needs? Has your healthcare provider reviewed your*  
23 *medication in the past year? Did the md inquire if it was*  
24 *appropriate for you (cost, side effects, etc.)*  
25

26 (Expected answers: I spoke with the secretary; she was helpful, she guided me with the use of the  
27 web platform. They offered me if I wanted an in-person, phone or virtual meeting. I met X  
28 professional(s), by phone, because I don't have access to the internet).  
29  
30

31 **4. Would you have any advice for the healthcare professionals in your FMG to make the**  
32 **remote consultation ideal?**  
33

34 *(Suggested probes to rephrase the question if needed):*

- 35 - *How might healthcare professionals ensure that patients' needs have been met*  
36 *during a remote consultation?*  
37 o *How were you asked the question?*  
38 - *What's important to you in a remote encounter?*  
39 - *What are your needs and expectations during a remote encounter?*  
40 - *How would you like the teleconsultation meetings to continue over time?*  
41  
42

43 (Expected responses: the doctor didn't move, I felt like the screen stopped working... I wish he  
44 had nodded... I found it harder to feel the empathy of the professional through the screen, he  
45 didn't tell me he would be taking notes during our encounter, I felt like he was disinterested... I  
46 would have liked him to ask me how I found the meeting or to make sure that my understanding  
47 was good, I have hearing difficulties, it was difficult for me to do the meeting by phone)  
48

49 **ACKNOWLEDGEMENTS**  
50

51 Thank you very much, MR. or MS. (NAME OF PARTICIPANT).  
52

53 If you agree, we may get back to you in a few months to chat again.  
54

55 Goodbye.  
56  
57  
58  
59  
60

1  
2  
3  
4  
5  
6  
7  
8  
9  
10  
11  
12  
13  
14  
15  
16  
17  
18  
19  
20  
21  
22  
23  
24  
25  
26  
27  
28  
29  
30  
31  
32  
33  
34  
35  
36  
37  
38  
39  
40  
41  
42  
43  
44  
45  
46  
47  
48  
49  
50  
51  
52  
53  
54  
55  
56  
57  
58  
59  
60

Appendix 2: The perspective of patients with chronic diseases - Recommendations for continuity of teleconsultation after the pandemic

For peer review only

The perspective of patients with chronic diseases

## Recommendations for continuity of teleconsultation after the pandemic



As a patient, I would like

1. To continue receiving teleconsultation services even after the pandemic, but not make it mandatory if it is not beneficial to me.
2. To know the advantages and disadvantages of teleconsultation and face-to-face meetings, so that I can form an opinion that suits my needs.
3. That my preferences are considered when choosing the consultation mode. I don't want to feel that the choice is imposed on me. I want to express myself for each meeting, because my needs evolve with time and my condition.
4. That the professional team considers both my personal characteristics and the determinants of my health as this may influence my ability to have teleconsultation meetings.
5. To have a meeting by phone for certain reasons for consultation, in particular during follow-ups when my condition is stable or for medication renewals, for example. This allows me to save time.
6. That in the event that the reason for my consultation requires a physical examination or visual observation by the healthcare professional, to be able to benefit from a face-to-face appointment from the outset, while avoiding a remote meeting, as this duplicates the appointments.
7. That even if I receive services in teleconsultation, my interprofessional team collaborates. I realize the lack of collaboration even if I am not physically present.
8. That my professional team exhibits the following attitudes for a positive care experience: punctuality, listening, empathy, trust, consideration, knowledge of their profession, availability, involvement, communication and active listening. I capture the professionalism even in teleconsultation.
9. That certain topics are avoided over the phone, especially when it comes to my mental health, weight gain, or other topics that make me uncomfortable.
10. To be able to invite a loved one to join the discussion if I wish. They should be able to hear and watch the consultation like me. I can also consult with him or her to make a decision if I feel the need.



Poitras, ME., Couturier, V., Poirier MD., Massé S., T.Vaillancourt, V., Cormier, C., Morin, A., Beaupré P., Boudreault A., Blanchette P., Bernier AA. (2021).

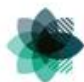

CHAIRE DE RECHERCHE  
SUR LES PRATIQUES  
PROFESSIONNELLES OPTIMALES  
EN SOINS PRIMAIRES



UNIVERSITÉ DE  
SHERBROOKE



UNITÉ DE SOUTIEN  
SSA | QUÉBEC  
Ensemble pour un système de santé qui apprend

Fonds de recherche  
Santé  
Québec

## COREQ (COnsolidated criteria for REporting Qualitative research) Checklist

A checklist of items that should be included in reports of qualitative research. You must report the page number in your manuscript where you consider each of the items listed in this checklist. If you have not included this information, either revise your manuscript accordingly before submitting or note N/A.

| Topic                                          | Item No. | Guide Questions/Description                                                                                                                              | Reported on Page No. |
|------------------------------------------------|----------|----------------------------------------------------------------------------------------------------------------------------------------------------------|----------------------|
| <b>Domain 1: Research team and reflexivity</b> |          |                                                                                                                                                          |                      |
| <i>Personal characteristics</i>                |          |                                                                                                                                                          |                      |
| Interviewer/facilitator                        | 1        | Which author/s conducted the interview or focus group?                                                                                                   |                      |
| Credentials                                    | 2        | What were the researcher's credentials? E.g. PhD, MD                                                                                                     |                      |
| Occupation                                     | 3        | What was their occupation at the time of the study?                                                                                                      |                      |
| Gender                                         | 4        | Was the researcher male or female?                                                                                                                       |                      |
| Experience and training                        | 5        | What experience or training did the researcher have?                                                                                                     |                      |
| <i>Relationship with participants</i>          |          |                                                                                                                                                          |                      |
| Relationship established                       | 6        | Was a relationship established prior to study commencement?                                                                                              |                      |
| Participant knowledge of the interviewer       | 7        | What did the participants know about the researcher? e.g. personal goals, reasons for doing the research                                                 |                      |
| Interviewer characteristics                    | 8        | What characteristics were reported about the interviewer/facilitator? e.g. Bias, assumptions, reasons and interests in the research topic                |                      |
| <b>Domain 2: Study design</b>                  |          |                                                                                                                                                          |                      |
| <i>Theoretical framework</i>                   |          |                                                                                                                                                          |                      |
| Methodological orientation and Theory          | 9        | What methodological orientation was stated to underpin the study? e.g. grounded theory, discourse analysis, ethnography, phenomenology, content analysis |                      |
| <i>Participant selection</i>                   |          |                                                                                                                                                          |                      |
| Sampling                                       | 10       | How were participants selected? e.g. purposive, convenience, consecutive, snowball                                                                       |                      |
| Method of approach                             | 11       | How were participants approached? e.g. face-to-face, telephone, mail, email                                                                              |                      |
| Sample size                                    | 12       | How many participants were in the study?                                                                                                                 |                      |
| Non-participation                              | 13       | How many people refused to participate or dropped out? Reasons?                                                                                          |                      |
| <i>Setting</i>                                 |          |                                                                                                                                                          |                      |
| Setting of data collection                     | 14       | Where was the data collected? e.g. home, clinic, workplace                                                                                               |                      |
| Presence of non-participants                   | 15       | Was anyone else present besides the participants and researchers?                                                                                        |                      |
| Description of sample                          | 16       | What are the important characteristics of the sample? e.g. demographic data, date                                                                        |                      |
| <i>Data collection</i>                         |          |                                                                                                                                                          |                      |
| Interview guide                                | 17       | Were questions, prompts, guides provided by the authors? Was it pilot tested?                                                                            |                      |
| Repeat interviews                              | 18       | Were repeat interviews carried out? If yes, how many?                                                                                                    |                      |
| Audio/visual recording                         | 19       | Did the research use audio or visual recording to collect the data?                                                                                      |                      |
| Field notes                                    | 20       | Were field notes made during and/or after the interview or focus group?                                                                                  |                      |
| Duration                                       | 21       | What was the duration of the interviews or focus group?                                                                                                  |                      |
| Data saturation                                | 22       | Was data saturation discussed?                                                                                                                           |                      |
| Transcripts returned                           | 23       | Were transcripts returned to participants for comment and/or                                                                                             |                      |

| Topic                                  | Item No. | Guide Questions/Description                                                                                                        | Reported on Page No. |
|----------------------------------------|----------|------------------------------------------------------------------------------------------------------------------------------------|----------------------|
|                                        |          | correction?                                                                                                                        |                      |
| <b>Domain 3: analysis and findings</b> |          |                                                                                                                                    |                      |
| <i>Data analysis</i>                   |          |                                                                                                                                    |                      |
| Number of data coders                  | 24       | How many data coders coded the data?                                                                                               |                      |
| Description of the coding tree         | 25       | Did authors provide a description of the coding tree?                                                                              |                      |
| Derivation of themes                   | 26       | Were themes identified in advance or derived from the data?                                                                        |                      |
| Software                               | 27       | What software, if applicable, was used to manage the data?                                                                         |                      |
| Participant checking                   | 28       | Did participants provide feedback on the findings?                                                                                 |                      |
| <i>Reporting</i>                       |          |                                                                                                                                    |                      |
| Quotations presented                   | 29       | Were participant quotations presented to illustrate the themes/findings?<br>Was each quotation identified? e.g. participant number |                      |
| Data and findings consistent           | 30       | Was there consistency between the data presented and the findings?                                                                 |                      |
| Clarity of major themes                | 31       | Were major themes clearly presented in the findings?                                                                               |                      |
| Clarity of minor themes                | 32       | Is there a description of diverse cases or discussion of minor themes?                                                             |                      |

Developed from: Tong A, Sainsbury P, Craig J. Consolidated criteria for reporting qualitative research (COREQ): a 32-item checklist for interviews and focus groups. *International Journal for Quality in Health Care*. 2007. Volume 19, Number 6: pp. 349 – 357

**Once you have completed this checklist, please save a copy and upload it as part of your submission. DO NOT include this checklist as part of the main manuscript document. It must be uploaded as a separate file.**



# BMJ Open

## Chronic conditions patient's perception on post-COVID19 pandemic teleconsulting continuation in primary care clinics: A qualitative descriptive study

|                                 |                                                                                                                                                                                                                                                                                                                                                                                                                                                                                                                                                                                                                                                                                                                                                                                                                                                                                                                                                                                                                                                                                                                                                                                                               |
|---------------------------------|---------------------------------------------------------------------------------------------------------------------------------------------------------------------------------------------------------------------------------------------------------------------------------------------------------------------------------------------------------------------------------------------------------------------------------------------------------------------------------------------------------------------------------------------------------------------------------------------------------------------------------------------------------------------------------------------------------------------------------------------------------------------------------------------------------------------------------------------------------------------------------------------------------------------------------------------------------------------------------------------------------------------------------------------------------------------------------------------------------------------------------------------------------------------------------------------------------------|
| Journal:                        | <i>BMJ Open</i>                                                                                                                                                                                                                                                                                                                                                                                                                                                                                                                                                                                                                                                                                                                                                                                                                                                                                                                                                                                                                                                                                                                                                                                               |
| Manuscript ID                   | bmjopen-2022-066871.R2                                                                                                                                                                                                                                                                                                                                                                                                                                                                                                                                                                                                                                                                                                                                                                                                                                                                                                                                                                                                                                                                                                                                                                                        |
| Article Type:                   | Original research                                                                                                                                                                                                                                                                                                                                                                                                                                                                                                                                                                                                                                                                                                                                                                                                                                                                                                                                                                                                                                                                                                                                                                                             |
| Date Submitted by the Author:   | 16-Nov-2022                                                                                                                                                                                                                                                                                                                                                                                                                                                                                                                                                                                                                                                                                                                                                                                                                                                                                                                                                                                                                                                                                                                                                                                                   |
| Complete List of Authors:       | <p>Postras, Marie-Eve; Université de Sherbrooke, Department of Family Medicine and Emergency Medicine, Faculty of Medicine and Health Sciences; Centre de santé et de services sociaux de Chicoutimi, Québec, Canada</p> <p>Poirier, Marie-Dominique; Centre intégré universitaire de santé et de services sociaux du Saguenay-Lac-Saint-Jean du Québec</p> <p>Couturier, Yves; Université de Sherbrooke, social work</p> <p>T Vaillancourt, Vanessa; Université de Sherbrooke, ; Centre intégré universitaire de santé et de services sociaux du Saguenay-Lac-Saint-Jean du Québec,</p> <p>Cormier, Caroline; Université de Sherbrooke</p> <p>Gauthier, Gilles ; Centre intégré universitaire de santé et de services sociaux du Saguenay-Lac-Saint-Jean du Québec</p> <p>Massé, Sylvie; Centre intégré universitaire de santé et de services sociaux du Saguenay-Lac-Saint-Jean du Québec</p> <p>Gendron, Audrey; Université de Sherbrooke</p> <p>Oswick, Megan; Université de Sherbrooke</p> <p>Morin, Anaëlle; Université de Sherbrooke</p> <p>Blanchette, Patricia; Université de Sherbrooke</p> <p>Bernier, Andréanne; Université du Québec en Abitibi-Témiscamingue, Department of Health Sciences</p> |
| <b>Primary Subject Heading</b>: | General practice / Family practice                                                                                                                                                                                                                                                                                                                                                                                                                                                                                                                                                                                                                                                                                                                                                                                                                                                                                                                                                                                                                                                                                                                                                                            |
| Secondary Subject Heading:      | Patient-centred medicine, Qualitative research                                                                                                                                                                                                                                                                                                                                                                                                                                                                                                                                                                                                                                                                                                                                                                                                                                                                                                                                                                                                                                                                                                                                                                |
| Keywords:                       | PRIMARY CARE, Telemedicine < BIOTECHNOLOGY & BIOINFORMATICS, COVID-19, Organisation of health services < HEALTH SERVICES ADMINISTRATION & MANAGEMENT, QUALITATIVE RESEARCH                                                                                                                                                                                                                                                                                                                                                                                                                                                                                                                                                                                                                                                                                                                                                                                                                                                                                                                                                                                                                                    |
|                                 |                                                                                                                                                                                                                                                                                                                                                                                                                                                                                                                                                                                                                                                                                                                                                                                                                                                                                                                                                                                                                                                                                                                                                                                                               |

SCHOLARONE™  
Manuscripts





I, the Submitting Author has the right to grant and does grant on behalf of all authors of the Work (as defined in the below author licence), an exclusive licence and/or a non-exclusive licence for contributions from authors who are: i) UK Crown employees; ii) where BMJ has agreed a CC-BY licence shall apply, and/or iii) in accordance with the terms applicable for US Federal Government officers or employees acting as part of their official duties; on a worldwide, perpetual, irrevocable, royalty-free basis to BMJ Publishing Group Ltd ("BMJ") its licensees and where the relevant Journal is co-owned by BMJ to the co-owners of the Journal, to publish the Work in this journal and any other BMJ products and to exploit all rights, as set out in our [licence](#).

The Submitting Author accepts and understands that any supply made under these terms is made by BMJ to the Submitting Author unless you are acting as an employee on behalf of your employer or a postgraduate student of an affiliated institution which is paying any applicable article publishing charge ("APC") for Open Access articles. Where the Submitting Author wishes to make the Work available on an Open Access basis (and intends to pay the relevant APC), the terms of reuse of such Open Access shall be governed by a Creative Commons licence – details of these licences and which [Creative Commons](#) licence will apply to this Work are set out in our licence referred to above.

Other than as permitted in any relevant BMJ Author's Self Archiving Policies, I confirm this Work has not been accepted for publication elsewhere, is not being considered for publication elsewhere and does not duplicate material already published. I confirm all authors consent to publication of this Work and authorise the granting of this licence.

1  
2  
3 **Chronic conditions patient's perception on post-COVID19 pandemic teleconsulting**  
4 **continuation in primary care clinics: A qualitative descriptive study**  
5  
6

7 Marie-Eve Poitras \*, RN, PhD, Research chair on optimal professional practice in primary  
8 care, Department of Family Medicine and Emergency Medicine, Faculty of Medicine and  
9 Health Sciences, Université de Sherbrooke, Saguenay, Canada  
10  
11  
12

13  
14 \*Corresponding author

15 305 Rue Saint Vallier, Chicoutimi,

16 QC G7H 5H6

17 418-541-1234, ext. 3249

18 marie-eve.poitras@usherbrooke.ca

19 ORCID: 0000-0002-3315-0190  
20  
21  
22  
23  
24  
25

26 Marie-Dominique Poirier, Patient-partner, Centre intégré universitaire de santé et de  
27 services sociaux du Saguenay-Lac-Saint-Jean, Saguenay, Canada  
28  
29  
30

31 Yves Couturier, PhD, Department of Social Work, Université de Sherbrooke, Sherbrooke,  
32 Canada  
33  
34

35 ORCID: 0000-0001-6848-8354  
36  
37  
38

39 Vanessa T. Vaillancourt, MSc, Department of Family Medicine and Emergency Medicine,  
40 Faculty of Medicine and Health Sciences, Université de Sherbrooke, Saguenay, Canada  
41  
42

43 ORCID: 0000-0002-9187-2300  
44  
45

46 Caroline Cormier, M. Ps. Éd., Department of Family Medicine and Emergency Medicine,  
47 Faculty of Medicine and Health Sciences, Université de Sherbrooke, Saguenay, Canada  
48  
49

50  
51 Gilles Gauthier, Patient-Partner, Centre intégré universitaire de santé et de services  
52 sociaux du Saguenay Lac Saint Jean, Saguenay, Canada  
53  
54  
55  
56  
57  
58  
59

1  
2  
3 Sylvie Massé, RN, MSc, MGO, Centre intégré universitaire de santé et de services  
4 sociaux du Saguenay-Lac-Saint-Jean, Saguenay, Canada.  
5  
6  
7

8  
9 Audrey Gendron, MD (c), Department of Family Medicine and Emergency  
10 Medicine, Faculty of Medicine and Health Sciences, Université de Sherbrooke,  
11 Saguenay, Canada  
12  
13  
14

15 Megan L. Oswick, MD (c), Department of Family Medicine and Emergency  
16 Medicine, Faculty of Medicine and Health Sciences, Université de Sherbrooke,  
17 Saguenay, Canada  
18  
19  
20  
21

22 Anaëlle Morin, MSc (c), Department of Family Medicine and Emergency  
23 Medicine, Faculty of Medicine and Health Sciences, Université de Sherbrooke,  
24 Saguenay, Canada  
25  
26  
27

28 Patricia Blanchette, RN, MSc, PhD (c), Department of Family Medicine and Emergency  
29 Medicine, Université de Sherbrooke, Saguenay, Canada  
30  
31  
32

33 Andréanne Bernier, RN, MSc, PhD (c), Department of Health Sciences, Université du  
34 Québec en Abitibi-Témiscamingue, Québec, Canada  
35  
36  
37

38 **Word count**

39 4669  
40  
41  
42  
43  
44  
45  
46  
47  
48  
49  
50  
51  
52  
53  
54  
55  
56  
57  
58  
59  
60

## Abstract

**Objectives** The COVID-19 pandemic has led to the prioritization of teleconsultation instead of face-to-face encounters. However, teleconsultation revealed some shortcomings and undesirable effects that may counterbalance benefits. This study aims to explore the perspective of patients with chronic diseases on teleconsultation in primary care. This article also proposes recommendations to provide patient-oriented and appropriate teleconsultations.

**Design** We conducted a qualitative descriptive study that explored the patients' perception regarding teleconsultation services and the following themes: access, perceived benefits and disadvantages, interprofessional collaboration, patient-centered approach, specific competencies of professionals, and patient's global needs and preferences.

**Setting** Six primary care clinics in three regions of Quebec

**Participants** 39 patients were interviewed by telephone through semi-structured qualitative interviews.

**Results** Patients want to maintain teleconsultation for the post-pandemic period as long as their recommendations are followed: be able to choose to come to the clinic if they wish to, feel that their individual and environmental characteristics are considered, feel involved in the choice of the modality of each consultation, feel that interprofessional collaboration and patient-centered approach are promoted, and to maintain the professionalism, which must not be lessened despite the remote context.

**Conclusion** Patients mainly expressed high satisfaction with teleconsultation. However, several issues must be addressed. Patients do and should contribute to the implementation of teleconsultation in primary care. They wish to be frequently consulted about their preferred consultation modality, which may change over time. The patient perspective must therefore be part of the balanced implementation of optimal teleconsultation that is currently taking place.

1  
2  
3 **Keywords** Primary care, telehealth or teleconsultation, chronic disease patients, patient-  
4 centered care.  
5  
6

7  
8 **Strengths and limitations of this study**  
9

- 10  
11 • This article presents field data that reports patients' experiences and perceptions of  
12 teleconsultation in primary care.  
13  
14 • Our partnership and patient-oriented research approach ensures that the data  
15 presented emerge from patients' concerns.  
16  
17 • The patients' satisfaction high rate with teleconsultation could have been influenced  
18 by acquiescence and desirability emotional bias  
19  
20 • Patients' recommendations for continuing teleconsultation services perennity after  
21 COVID-19 were not differentiated by health condition, which should be considered  
22 when interpreting the results.  
23  
24  
25  
26  
27  
28  
29  
30  
31  
32  
33  
34  
35  
36  
37  
38  
39  
40  
41  
42  
43  
44  
45  
46  
47  
48  
49  
50  
51  
52  
53  
54  
55  
56  
57  
58  
59  
60

## INTRODUCTION

Since March 2020, public health measures adopted in several countries in response to the COVID-19 pandemic have led to the prioritization of teleconsultation over face-to-face services in primary care health organizations. Teleconsultation is any interaction between a patient and a health care professional that takes place at a distance and uses some form of information technology (e.g., virtual approaches via videoconferencing through Zoom, Teams, and Reacts) or communication (e.g., telephone, email, SMS).<sup>1</sup> Although teleconsultation had been used sporadically worldwide, the COVID-19 health crisis led to major advances in the deployment and use of this mode of intervention in several primary care clinics.<sup>2,3</sup> These primary care clinics propose health and social services provided by general practitioners working closely with other health and social services professionals, such as nurses and social workers<sup>4</sup>. Innovations' spreading requires time sensitive key elements, and it can typically take up to a decade to cross, successfully or not, the adoptions' classic five steps in real life.<sup>5</sup> Yet under the pandemic time shortage, the teleconsultations broadcast was hastened, and their *promotion-to-adoption* journey most likely did not get the time to fulfill that theoretical framework. Given so, In the post-pandemic period<sup>6 7 8</sup>, the use of teleconsultation faced some shortcomings and undesirable effects.<sup>9-14</sup> As such, the number of inappropriate visits to Emergency departments has reportedly increased in the province of Québec, given that some teleconsultation-users patients got to have a physical exam (e.g. auscultation), ending up in the emergency room. In reality, the majority of emergency rooms' visits were related to minor problems that could have been treated by a family physician or primary care teams.<sup>15</sup> This mode of care restricts access to services for people with limited mobility, limited access to the Internet or teleconsultation tools, or low levels of digital literacy.<sup>12 16</sup> These undesirable effects may counterbalance the positive effects of teleconsultation demonstrated in the scientific literature.<sup>17</sup> Given that teleconsulting will remain, at least in part, a regular practice of healthcare professionals and patients after the COVID-19 pandemic.<sup>1 18-20</sup> Considering the patients' perception, regarding this fast overview, the

1  
2  
3 teleconsultation allows for a better trade-off between the high potential for the patient  
4 experience or health improved and the adverse effects of this technical innovation.  
5  
6

7  
8 In the past year, various recommendations have been published to support good  
9 practice in teleconsultation.<sup>2 21 22</sup> These recommendations are highly useful in supporting  
10 healthcare professionals towards proper implementation of teleconsultation in  
11 healthcare settings between a patient and a clinician from an intraprofessional and  
12 clinician-centred perspective. However, they may be incomplete as they need to  
13 consider the needs, preferences, and general representation of patients living with  
14 chronic diseases concerning teleconsultation. Furthermore, the tools supporting  
15 teleconsultation are built from a clinician's perspective without integrating the patient's  
16 perspective.  
17  
18  
19  
20  
21  
22  
23  
24

25 Some authors explored the factors related to a positive experience (or not) of care in  
26 teleconsultation from the perspective of patients<sup>23-28</sup>, but very few focused on patients  
27 with chronic diseases in primary care.<sup>29 30</sup> In addition, patient-led studies incorporating  
28 the concept of patient-oriented research are rare. Since few scientific recommendations  
29 have been identified on teleconsultation for professionals working in primary care clinics  
30 and considering that patients with chronic illnesses are those who consult family  
31 medicine practices most frequently<sup>31</sup>, we propose that they are in the best position to  
32 testify to the experience of teleconsultation in primary care. As the desire to sustain  
33 teleconsultation in primary care takes hold, it seems essential to incorporate the patient  
34 perspective during this rapidly accelerating phase of innovation about teleconsultation.  
35 To do so, our study, co-led by two patient-partners, has the following two objectives: 1)  
36 to explore the perspective of patients with chronic diseases on the teleconsultation  
37 offered in primary care clinics; and 2) to make general recommendations regarding the  
38 post-pandemic adequacy between the teleconsultation offer and the needs and  
39 expectations of patients with chronic diseases.  
40  
41  
42  
43  
44  
45  
46  
47  
48  
49  
50  
51  
52  
53

## 54 **METHODS**

55  
56  
57  
58  
59  
60



1  
2  
3 We conducted<sup>32</sup> a longitudinal qualitative descriptive study<sup>33</sup> with two data collection  
4 periods<sup>34</sup> in six primary care clinics located in three regions (metropolitan, urban and  
5 semi-urban) of Quebec, Canada. These primary care clinics are funded by public  
6 funds<sup>35</sup> being defined as family physicians group working together and in close  
7 collaboration with other health and social services professionals (e.g., registered nurses,  
8 social workers, nurse practitioners)<sup>4</sup>. Teleconsultation is offered here in various  
9 modalities, including email, chat, telephone, and video, through various applications  
10 (FaceTime, Zoom, Microsoft Teams, etc.). Modalities can be used alone or in  
11 combination. Some clinics got these features belt into an electronic medical record. We  
12 have used the COREQ self-assessment grid for qualitative studies to report on this  
13 project's accuracy and methodology.<sup>36</sup>

### 24 **Patient and public involvement**

25  
26 The research was co-led by two patient partners, two researchers, and one decision-  
27 maker. The patient and clinical co-leaders supported the researchers in carrying out the  
28 project according to the partnership methodologies guided by the Canadian Institutes of  
29 Health Research<sup>37</sup> and our team's previous work.<sup>38</sup> One of the patient co-leaders had  
30 concerns about teleconsultation in primary care, and the original research idea emerged  
31 from there. Both patient co-leaders collaborated on each step of this study, and their  
32 contribution is detailed in further sections. As co-authors, they have also revised the  
33 manuscript and provided feedback to enhance it.

### 42 **Sample**

43  
44 We built a convenient sample of 49 registered patients from the Training of Trainers in  
45 Primary care (F2PL) study<sup>39</sup>, who were assessed by phone by the patient co-leaders or  
46 by a research agent. These patients are persons living with chronic diseases, followed  
47 by family physicians in a primary care clinic and, sometimes, in collaboration with a  
48 clinical nurse and/or a social worker. The project #2019-037 obtained ethical approval  
49 from the Centre intégré universitaire de santé et de services sociaux du Saguenay Lac-  
50 St-Jean and all participants provided consent to participate in the interview.

## Data collection

A research team member first contacted patients during the first wave of the COVID-19 pandemic, between March and August 2020, to ask them about their experience with teleconsultation. This initial data collection highlighted patients' needs for teleconsultation services, and results were published elsewhere.<sup>34</sup> Between February and March 2021, we further explored this question by examining, among other things, patients' representations of pursuing teleconsultation, reasons for consultations conducive to teleconsultation, the impact of teleconsultation on interprofessional collaboration, as well as the use of patient partnered care approach. We conducted semi-structured qualitative telephone interviews (Appendix 1: Interview guide) lasting approximately 30 minutes in February 2021 by three research professionals (X), three graduate nursing students (X), as well as one patient co-leader (X) after a training provided by both principal co-investigators, X (junior) and X (senior). We audio recorded the interviews with the consent of the study participants. We have taken field notes during each interview to enrich data analysis.

## Analysis

We performed qualitative analysis according to three concurrent streams: data condensation (e.g., selection, the transformation of raw data), data display (e.g., narrative text, table, matrix), and verification of conclusions (e.g., go back to field notes for each patient, discussion with the research team).<sup>33</sup> We conducted a deductive thematic analysis<sup>33</sup> of the interview data based on the themes explored by the interview guide, which are, in relation to teleconsultation: satisfaction with the services received, interprofessional collaboration, the inclusion of significant relatives in care, digital literacy of patients, soft skills and attitudes of professionals, valuing experiential knowledge in shared decision making. Then, we, including a patient co-leader, determined the themes related to the teleconsultation context. We explored the following seven themes: 1) access to primary care clinics services during a pandemic; 2) advantages and disadvantages of teleconsultation compared with face-to-face encounters; 3) interprofessional

collaboration; 4) healthcare professionals' competencies specific to teleconsultation; 5) the patient partnered approach to care; 6) avenues for improving measures of patients' perceptions of their care experience<sup>40</sup>; and 7) patients' needs and preferences during a teleconsultation. All research team members collaborated on the coding identification and created a Microsoft Word template to display the data and organize the text for the next step of the analysis. We performed a live encoding that allows for simultaneous manual coding while listening to the audio recording. This method is beneficial to preserve the participants' voice, thus empowering the process to sense the intent, context, and meaning of their words.<sup>41</sup> Patients co-leaders in this project favored this method over the transcript coding because they felt they understood more of what the participants wanted to express. The interviews' encoding was made by at least two research team members, using Microsoft Word software. The principal investigators (X) and patient co-leader (X) validated all the encodings one by one. We had all data analyzed, and the conclusions were discussed in a meeting with all research team members, leading to the extraction of proposals and recommendations reported in the present article.

## RESULTS

### Participants

Of the 49 participants initially recruited for the F2PL study, 39 agreed to participate in the present study, six were unreachable, and four declined to participate. Table 1 presents the participants' sociodemographic characteristics and table 2 their medical and psychosocial conditions.

**Table 1: Sociodemographic characteristics of the study participants**

| Characteristics        | Patients (N=39) |
|------------------------|-----------------|
|                        | n (%)           |
| <b>Sex</b>             |                 |
| Male                   | 16 (41)         |
| Female                 | 23 (59)         |
| <b>Age (mean=60.5)</b> |                 |

|       |         |
|-------|---------|
| < 30  | 0 (0)   |
| 31-40 | 5 (13)  |
| 41-50 | 3 (8)   |
| 51-64 | 17 (43) |
| 65 +  | 14 (36) |

#### Marital status<sup>a</sup>

|                            |         |
|----------------------------|---------|
| Married/Common-law partner | 31 (80) |
| Single                     | 3 (8)   |
| Separated/Divorced         | 4 (10)  |

#### Highest level of education<sup>a</sup>

|                      |         |
|----------------------|---------|
| Primary/High school  | 10 (25) |
| Professional/College | 18 (46) |
| University           | 10 (25) |

#### Employment status<sup>a</sup>

|                   |         |
|-------------------|---------|
| Working           | 14 (36) |
| Work interruption | 7 (18)  |
| Retired           | 15 (38) |
| Other             | 2 (5)   |

#### Income (CAN\$)<sup>b</sup>

|                   |         |
|-------------------|---------|
| [0 – 29 999]      | 7 (17)  |
| [30 000 – 59 999] | 14 (36) |
| [60 000 – 99 999] | 9 (23)  |
| ≥100 000          | 5 (13)  |

#### Location

|           |         |
|-----------|---------|
| Metropole | 10 (26) |
| Rural     | 15 (38) |
| Urban     | 14 (36) |

#### Healthcare provider before COVID-19

|                                               |         |
|-----------------------------------------------|---------|
| Family physician                              | 6 (15)  |
| Family physician<br>and nurse                 | 16 (41) |
| Family physician<br>and social worker         | 12 (31) |
| Family physician,<br>nurse, and social worker | 5 (13)  |

<sup>a</sup> Data missing for 1 patient; <sup>b</sup> Data missing for 4 patients

**Table 2: Medical and psychosocial conditions of the study participants**

| Medical and psychosocial conditions   | Patients (N=39)<br>n (%) |
|---------------------------------------|--------------------------|
| <b>Type <sup>a</sup></b>              |                          |
| Diabetes                              | 13 (33)                  |
| Arterial hypertension                 | 11 (28)                  |
| Personal issues                       | 6 (15)                   |
| Difficulties adapting to situations   | 5 (13)                   |
| Mental health issues                  | 6 (15)                   |
| Coronary artery disease (CAD)         | 5 (13)                   |
| Cancer                                | 4 (10)                   |
| Asthma                                | 3 (7.5)                  |
| Relationship issues                   | 4 (10)                   |
| Suicidal thoughts                     | 1 (2.5)                  |
| Bereavement                           | 1 (2.5)                  |
| Chronic obstructive pulmonary disease | 1 (2.5)                  |
| Professional issues                   | 5 (13)                   |
| Other                                 | 15 (38)                  |

---

**Number of conditions**


---

|      |         |
|------|---------|
| 1    | 18 (46) |
| 2-3  | 14 (36) |
| 4-5≤ | 7 (18)  |

---

<sup>a</sup> *Not mutually exclusive*

Analysis of the interview data allowed us to develop recommendations based on the participants' perspective. Additional verbatims to support each of the findings are presented in Table 3.

**Table 3 Recommendations of patients living with chronic diseases regarding the continuity of teleconsultation after the COVID-19 pandemic**

| Recommendations                                                                                                 | Verbatims                                                                                                                                                         | Participants identification |
|-----------------------------------------------------------------------------------------------------------------|-------------------------------------------------------------------------------------------------------------------------------------------------------------------|-----------------------------|
| Considering its many advantages, the end of the pandemic must allow the continuity of teleconsultation services | <i>"I don't have a driver's license; I don't have a car. So, I don't have to travel<br/>"It suits my needs [teleconsultation], because I don't have to spend"</i> | 101-5-001                   |
| Face-to-face consultation must take precedence over teleconsultation when a physical examination is required    | <i>"I had sores on my face, on the phone, it was more difficult"</i>                                                                                              | 302-5-003                   |

|                                                                                                                   |                                                                                                                                                                                                |                                                                                                                                                                                                                                                                                                                                                                                                                                    |                                     |
|-------------------------------------------------------------------------------------------------------------------|------------------------------------------------------------------------------------------------------------------------------------------------------------------------------------------------|------------------------------------------------------------------------------------------------------------------------------------------------------------------------------------------------------------------------------------------------------------------------------------------------------------------------------------------------------------------------------------------------------------------------------------|-------------------------------------|
| 1<br>2<br>3<br>4<br>5<br>6<br>7<br>8<br>9<br>10<br>11<br>12<br>13<br>14<br>15<br>16<br>17<br>18<br>19<br>20<br>21 | Consider the reasons for consultations and the individual and environmental characteristics of the patient to decide on the appropriateness of a face-to-face consultation or teleconsultation | <i>"Anything that has to do with social relations, when there's a lot of explaining or emotional issues...I think face-to-face would be much easier"</i><br><i>"My husband is deaf. The telephone consultation is not ideal. I absolutely have to make time to accompany my husband during phone meetings because he is not able to do it alone"</i><br><i>"I don't have internet...computers, internet, I don't know that..."</i> | 202-5-001<br>102-5-004<br>101-5-010 |
| 22<br>23<br>24<br>25<br>26<br>27<br>28<br>29<br>30                                                                | Involve the patient in choosing the consultation mode for each encounter                                                                                                                       | <i>"In my case, I don't have a relationship with my family doctor, I don't need to have one either. I'm not looking for that. If I needed a consultation with a social worker, I'd like it to be face to face because I'm looking more for the relationship"</i>                                                                                                                                                                   | 202-5-001                           |
| 31<br>32<br>33<br>34<br>35<br>36<br>37<br>38<br>39                                                                | Explain to the patient how the interprofessional dimension will be addressed                                                                                                                   | <i>"I don't know what the difference is between the nurse and the nutritionist"</i><br><i>"They [social worker, doctor, and nutritionist] write to each other every time I have a meeting. They know everything"</i>                                                                                                                                                                                                               | 301-5-001<br>302-5-003              |
| 40<br>41<br>42<br>43<br>44<br>45<br>46<br>47<br>48<br>49<br>50<br>51                                              | Intervene according to the care approach in partnership with the patient in teleconsultation                                                                                                   | <i>"My healthcare professional asks questions and is interested in my problem, I don't perceive any change in his or her approach virtually compared to when I come to the office"</i><br><i>"He [the healthcare professional] asked me for my opinion, we decided to pursue this [in teleconsultation, regarding treatment choice]"</i>                                                                                           | 202-5-007<br>301-5-006              |
| 52<br>53<br>54<br>55<br>56<br>57                                                                                  | The positive attitudes expressed by healthcare                                                                                                                                                 | <i>"I had the impression that there was more time to listen to me. The first question was, «How are you»? It was in a calm way. On the phone, it's</i>                                                                                                                                                                                                                                                                             | 202-5-005<br>201-5-001              |



---

professionals in a face-to-face setting must be maintained and perceived by patients in a teleconsultation setting

*even more important, I find, because you don't see the person "*

*"Five to ten minutes late is acceptable to me. If it's longer than that, I would like to be notified. My doctor was about 30, 40 minutes late. I was at my office, doing paperwork while waiting for my teleconsultation, so it wasn't a problem, but for people who do not have a desk job it can be a problem"*

---

## Findings

Through this unique perspective of experiential knowledge, we aim to promote the continuity and adequacy of teleconsultation services offered in primary care clinics following the pandemic (Appendix 2: Patients' 10 recommendations for continued teleconsultation after the pandemic).

*1- Considering its many advantages, the end of the pandemic must allow the improved continuity of teleconsultation services*

According to the participants, teleconsultation brings its own set of benefits. As expressed by the patients interviewed, the savings in time and money are significant for routine clinical follow-up needs. In addition to the financial aspect, teleconsultation is also advantageous from an organizational point of view since it saves time. One patient mentioned that a teleconsultation lasting approximately fifteen minutes, saves him quadruple and more the time. This patient explained that the absence of travel allowed him to spend less time on his consultation in a primary care clinic. In addition, many patients reported not having to ask their employer to be released from work, not having to deal with unexpected road conditions (traffic jams, winter driving), losing time to find a parking space and waiting several minutes in a waiting room. For patients with young children or other family responsibilities, teleconsultation facilitates family logistics.

1  
2  
3  
4 However, this desired continuity must be accompanied by a review of the adverse  
5 effects of consultation. For example, teleconsultation must not delay the consultation  
6 process to emergency services or minimize the importance of interprofessional  
7 collaboration.  
8  
9

10  
11 *2- Face-to-face consultation must take precedence over teleconsultation when a*  
12 *physical examination is required*  
13  
14  
15

16 During the pandemic period, some patients received teleconsultation services for which  
17 they would have preferred to be seen in person and for which certain concerns persisted  
18 after the meeting: "By telephone, it wasn't easy, I would have liked the doctor to look at  
19 my knee, she asked me if it was swollen. I couldn't see if it was swollen" (pt # 202-5-  
20 007). If a patient has a health condition that requires visual examination or auscultation  
21 by the clinician, an in-person consultation should be encouraged.  
22  
23  
24  
25  
26  
27

28 *3- Consider the reasons for consultations and the individual and environmental*  
29 *characteristics of the patient to decide on the appropriateness of a face-to-face*  
30 *consultation or teleconsultation*  
31  
32  
33

34 The patient's reason for consultation must be considered when making the decision to  
35 offer a face-to-face or remote encounter. Indeed, certain reasons for consultation make  
36 patients uncomfortable when they must discuss them during a teleconsultation, such as  
37 consulting for a mental health-related reason or for one that has emotional components.  
38 For example, addressing weight gain over the phone can be difficult for some patients: "I  
39 gained weight, but I don't want to talk about my weight. I gained weight but she the  
40 doctor didn't see me. It's something that affects me too much to talk about on the phone"  
41 (Pt # 202-5-007). When dealing with potentially sensitive issues for patients, a face-to-  
42 face meeting should be preferred. The reasons for consultation reported by the patients  
43 and which lend themselves well to teleconsultation include: the follow-up of stable  
44 chronic conditions, the transmission of test results when they announce good news, or  
45 the renewal of prescriptions. These verbatims capture the possible motives: "When the  
46  
47  
48  
49  
50  
51  
52  
53  
54  
55  
56  
57  
58  
59  
60

1  
2  
3 results are nothing serious, give them to me by phone..." (Pt # 302-5-005). "It can be  
4 done in teleconsultation if it's just to renew, there's no problem" (Pt # 301-5-002).  
5  
6

7  
8 Individual characteristics must also be considered when deciding on the best  
9 consultation mode. In some situations, individual characteristics such as deafness make  
10 it impossible to offer teleconsultation services. Similarly, there are environmental  
11 characteristics that hinder patients' teleconsultation experience. Some patients have  
12 limited access to communication services such as the Internet and telephone. This is the  
13 case for the following participant: "My mother lives in a seniors' residence. The phones  
14 are connected to the Internet, if the power is down, the phone is not available" (Pt # 102-  
15 5-004).  
16  
17  
18  
19  
20  
21  
22

#### 23 *4- Involve the patient in choosing the consultation mode for each encounter*

24  
25

26 The patient expresses personal preferences regarding the choice of teleconsultation or  
27 face-to-face mode. The patient expresses preferences depending on the type of  
28 professional services needed and their preferences change over time. For example, one  
29 patient expressed her needs as follows: "My needs have changed since the beginning of  
30 the pandemic last year. Before, I would have preferred to have a video-conference  
31 meeting, now the telephone meets my needs ... we just got used to the telephone and  
32 it's okay" (Pt # 302-5-003).  
33  
34  
35  
36  
37  
38  
39

#### 40 *5- Explain to the patient how the interprofessional dimension will be addressed*

41  
42

43 Communication between professionals is associated with a positive care experience for  
44 patients: "I feel that there is a whole multidisciplinary team and that they don't hesitate to  
45 talk to each other, that they know each other's strengths" (Pt # 201-5-005). Patients  
46 appreciate when the collaboration between professionals is carried out in the same way  
47 as during a face-to-face meeting: "I had the impression that they were more available  
48 [with the use of technology]. When my doctor isn't available, the super nurse meets with  
49 me. That works for me" (Pt # 202-5-005).  
50  
51  
52  
53  
54  
55  
56  
57  
58  
59  
60

1  
2  
3  
4 *6- Intervene according to the care approach in partnership with the patient in*  
5 *teleconsultation*  
6  
7

8 In the patient partnered approach to care, the patient is an active participant in the  
9 meetings and must feel being listened by the healthcare professional to express their  
10 needs<sup>42</sup>. However, some patients felt that the teleconsultation did not allow them to  
11 express all their needs: "It's hard to talk on the phone, I have less chit-chat than face to  
12 face" (Pt # 302-5-005). Yet participants emphasized the value of their experiential  
13 knowledge, which they have acquired over time. This specific knowledge must be  
14 considered by the professional, including in the context of teleconsultation. The following  
15 example about the pain felt by a patient is telling: "If I have problems because of  
16 chemotherapy, I am the one who has the pain, I am the pain specialist. If it's not strong  
17 enough, I'll tell my doctor, but they know how far I can go, I don't know that..." (Pt # 301-  
18 5-003).  
19  
20  
21  
22  
23  
24  
25  
26  
27  
28

29 *7- The positive attitudes expressed by healthcare professionals in a face-to-face setting*  
30 *must be maintained and perceived by patients in a teleconsultation setting*  
31  
32

33 Despite the distance, the patient feels an eventual lack of professionalism in  
34 teleconsultation. Patients interviewed found important to feel the availability and  
35 attentiveness of the professional in teleconsultation. Similarly, punctuality is a  
36 professional attitude that is important to the care experience: "I find it important that the  
37 professional is on time for the teleconsultation meeting" (Pt # 201-5-001).  
38  
39  
40  
41  
42  
43

44 Patients named other important professional attitudes to be maintained by professionals  
45 during teleconsultation, namely: empathy, trust, consideration, the feeling that the  
46 professional has knowledge related to his or her field of practice, communication  
47 (especially for follow-up information) and the preparation of the professional before an  
48 encounter. This verbatim excerpt supports the importance of professional attitudes: "I  
49 find it important to know that the professional knows my case. There are doctors who  
50 ask why did you come?... Look in my medical record" (Pt # 102-5-006).  
51  
52  
53  
54  
55  
56  
57  
58  
59  
60

1  
2  
3 Patients underlined the risk that technological mediation may be the gateway to fewer  
4 professional attitudes: "Sometimes I would hear him cleaning his house at the same  
5 time as his consultation, doing his dishes and then going to make himself a little  
6 supper... I even heard a toilet flush during my appointment [...]" (Pt # 101-5-003).  
7  
8  
9

## 10 11 **DISCUSSION**

12  
13  
14 The data collected at two points in time during phases 1 (February to July 2020) and 3  
15 (March to July 2021)<sup>43</sup> of the pandemic allowed us to identify the expectations of  
16 patients with chronic diseases regarding the teleconsultation services offered in primary  
17 care clinics. First, patients mentioned several advantages related to teleconsultation.  
18 They state the relevance of maintaining teleconsultation after the health crisis caused by  
19 COVID-19. However, patients' characteristics must be known and considered to decide  
20 on the best meeting mode for them. Despite the distance imposed by the change in  
21 service provision related to COVID-19, patients must be able to express their  
22 preferences and maintain their ability to participate in healthcare decisions that affect  
23 them. Interprofessional collaboration and a partnership approach to care with the patient  
24 must remain at the heart of professional teleconsultation practices. Moreover, they must  
25 be explicit despite the teleconsultation. Finally, certain attitudes expressed by healthcare  
26 professionals must be felt and perceived by the patient during the consultation. These  
27 results have allowed us to identify general recommendations from the patients'  
28 perspective, which are explained below.  
29  
30  
31  
32  
33  
34  
35  
36  
37  
38  
39  
40  
41  
42

43 We found patients' overall positive assessment of teleconsultation. This observation is  
44 consistent with the literature.<sup>44</sup> Our results corroborate what Ramaswamy & al (2020)<sup>45</sup>  
45 reported from a cohort study of 40,000 patients that teleconsultation is associated with  
46 higher patient satisfaction compared with face-to-face visits. Our study adds to these  
47 data and demonstrates that this principled adherence is conditional on meeting key  
48 conditions recognized by patients. Patient satisfaction is partly explained by the  
49 pragmatic efficiency of teleconsultation, such as time saving, money saving and the  
50 impact on daily life of a short consultation for the professional. In addition, the perception  
51  
52  
53  
54  
55  
56  
57  
58  
59  
60

1  
2  
3 of faster access to healthcare professionals is highly valued. These efficiency indicators  
4 from the users' point of view are often cited by patients and associated with a positive  
5 experience of care for them.<sup>40</sup> Similarly, as mentioned by Schaller et al. (2021)<sup>46</sup>, the  
6 digitization of practices, as accelerated by the pandemic, is a modality that will endure in  
7 the post-pandemic period. We believe, however, that this potential for sustainability has  
8 conditions for improvement and success, and that the patient's perspective in identifying  
9 these is very useful.  
10

11 From the patient's perspective, teleconsultation should not be used systematically,  
12 despite its great potential. Certain reasons of consultation and individual and  
13 environmental characteristics make teleconsultation inappropriate and must, therefore,  
14 be considered when choosing the best consultation mode. The patient must be  
15 considered as a key partner in the analysis of these reasons for each situation where  
16 teleconsultation is potentially useful<sup>47</sup>, as corroborated by the data in this study.  
17

18 According to an evaluation report of an healthcare organization<sup>17</sup> and in accordance with  
19 the recommendations of a medical association<sup>47</sup>, the need to perform a physical or  
20 psychological examination is a reason for consultation that is not compatible with  
21 teleconsultation, due to the possible risks for patients. Some health conditions, co-  
22 morbidities or multiple chronic diseases may also affect the patient's ability to benefit  
23 from teleconsultation services.<sup>21</sup> This is the case for patients with advanced age,  
24 cognitive impairments, and severe mental health problems.<sup>6 17 47</sup> Issues related to mental  
25 health and teleconsultation have been raised by primary care nurses who have  
26 expressed unease in using technology with clients with mental or psychosocial  
27 problems.<sup>7</sup>  
28

29 Teleconsultation can also be a source of health inequity. A study by Khoong et al  
30 (2021)<sup>48</sup> found that the most significant barrier to teleconsultation is limited access to the  
31 Internet and mobile data. Internet costs and digital literacy are therefore factors that may  
32 be limiting for some patients and hinder the provision of teleconsultation services. In  
33 order to determine the best consultation mode, the French Haute Autorité de la santé<sup>49</sup>  
34  
35  
36  
37  
38  
39  
40  
41  
42  
43  
44  
45  
46  
47  
48  
49  
50  
51  
52  
53  
54  
55  
56  
57  
58  
59  
60

1  
2  
3 mentions that the professionals must ensure the patient's eligibility for such a  
4 teleconsultation mode by considering several factors, such as the clinical situation, the  
5 ability to communicate at a distance, individual factors (physical, psychological, socio-  
6 professional, family), confidentiality at a distance, and the nature of the care (e.g.,  
7 physical contact necessary). However, we believe that this analysis must be done in  
8 partnership with the patient. The latter has a unique experiential knowledge acquired  
9 over time through daily experience with the health condition. The benefits and limitations  
10 of teleconsultation should be known to the patient. This is part of a collaborative care  
11 approach with the patient which is designed to ensure that decisions are made with the  
12 patient's needs and preferences in mind.  
13  
14

15  
16  
17  
18  
19  
20  
21  
22  
23 Some patients reported a lack of communication between healthcare professionals  
24 during teleconsultation. Patients had to repeat their needs and health history to each  
25 healthcare professional involved so that everyone was aware of their situation. This  
26 negatively impacts the patient's experience of care.<sup>40</sup> According to the literature review  
27 by Graves and Doucet (2016)<sup>50</sup>, there are several barriers to interprofessional  
28 collaboration to consider in teleconsultation. These include technical issues caused by  
29 technology, as well as coordination and organizational challenges, such as ambiguous  
30 responsibilities or increased workload caused by teleconsultation. Similarly, difficult  
31 relationships between professionals, marked by a lack of trust and tension, have a  
32 negative impact on teleconsultation collaboration within the team.<sup>51</sup> In addition, the  
33 technology used can have a mono-disciplinary silo effect if it promotes solo (clinician-  
34 patient) meetings that replace formal and informal consultation between clinicians.<sup>13 52</sup> If  
35 teleconsultation meetings are to be maintained over time, it seems appropriate to equip  
36 professionals with the skills needed for interprofessional collaboration at a distance.<sup>53</sup>  
37  
38  
39  
40  
41  
42  
43  
44  
45  
46  
47  
48  
49

50 Some patients reported feeling less comfortable expressing their needs in  
51 teleconsultation. As a result, encounters are quicker, colder, more informal, or even  
52 incomplete. The partnership approach to care with the patient must remain central even  
53 in the teleconsultation context. In this regard, the family member can also be consulted  
54  
55  
56  
57  
58  
59  
60



1  
2  
3 for decision-making purposes, if the patient so wishes.<sup>3</sup> One study has shown that  
4 teleconsultation encounters are more likely to reproduce a paternalistic approach to  
5 care, where the professional speaks more and controls the dialogue, while the patient  
6 has a more passive role.<sup>54</sup> Schaller & al.<sup>46</sup> mention that the patient must be the  
7 conductor of his or her care pathway, even in teleconsultation. This implies access to  
8 quality, useful and understandable information from healthcare professionals.  
9

10  
11 Based on data collected in this study, we believe that the rapid adoption of  
12 teleconsultation in response to the healthcare measures imposed by pandemic crisis  
13 may have hindered the implementation of the patient centered approach. Indeed,  
14 professionals had to adapt quickly, adding the additional burden of the health crisis,  
15 which may have had an impact on their well-being and mental health.<sup>7 55</sup> In addition,  
16 technologies used were not always mature enough to support intelligent  
17 teleconsultation, such as appointment scheduling, clinical record information and  
18 teleconsultation itself. The telephone often served as the teleconsultation technology,  
19 which fell far short of the capabilities of the best available technology devices.<sup>56</sup> A post-  
20 pandemic routinization will therefore need to go beyond the telephone mode and rely on  
21 technological development commensurate with scientific and patient recommendations.  
22 We assume that the technological delay has had an impact on the adoption of good  
23 practices. It is therefore recommended to ensure that the patient has full access to  
24 information as well as the required technology supplies.  
25  
26

27  
28 Patients named several professional qualities and attitudes associated with a positive  
29 teleconsultation care experience. Many patients reported that a first encounter with a  
30 professional remotely makes them more uncomfortable. To this end, according to the  
31 literature review by Graves and Doucet (2016)<sup>50</sup>, the importance of creating a  
32 relationship of trust between the professional and the patient is emphasized. This is  
33 created through quality communication and the experience of mutual understanding.  
34 The first visit with the patient should be face-to-face, to help build trust.  
35  
36  
37  
38  
39  
40  
41  
42  
43  
44  
45  
46  
47  
48  
49  
50  
51  
52  
53  
54  
55  
56  
57  
58  
59  
60

1  
2  
3  
4 This study has some limitations that need to be discussed. The patients' satisfaction  
5 high rate of with the teleconsultation could have been influenced by acquiescence and  
6 desirability emotional bias. Although questions were non-directional and neutrally  
7 framed, measuring patient satisfaction can be challenging<sup>57 58</sup> and some patient may  
8 have reported being more satisfaction than they actually got. Patients' recommendations  
9 for continuing teleconsultation services perennity after COVID-19 were not differentiated  
10 by health condition, which should be taken into consideration when interpreting the  
11 results. These must also be adapted and tailored to other contexts or patients with other  
12 health condition. The results obtained are related to the Quebec teleconsultation reality,  
13 so projection to other contexts may be limited. Several factors such as teleconsulting  
14 tools, the type of technologies,<sup>59</sup> and their integration to electronic medical records, as  
15 well as their shared costs, may influence the patients' satisfaction.<sup>60 61</sup> Given the  
16 patients were already part of a research study, they were not recruited based on their  
17 teleconsultation experiences. Therefore, although they may have had teleconsultation  
18 experiences during the study period, that could have been melt other health care  
19 experiences leading to a lower robustness of our data.  
20  
21  
22  
23  
24  
25  
26  
27  
28  
29  
30  
31  
32

## 33 34 CONCLUSION

35  
36  
37 The strict resumption of face-to-face clinical activities in primary care services, including  
38 the primary care clinics, would contribute to slowing down the modernization of services  
39 while risking a negative impact on the patient's experience of care. Indeed, patients  
40 perceive several benefits associated with teleconsultation and believe that it should be  
41 maintained in the post-pandemic period. However, teleconsultation should always be a  
42 win-win situation for both the patient and the clinician, ensuring that the patient is  
43 comfortable with it, and for each consultation. It is essential to take the time needed to  
44 effectively implement teleconsultation in primary care, particularly by highlighting the  
45 good practices of professionals to keep this encounter mode in line with patients' needs.  
46 We must emphasize the importance of documenting the adverse effects of imperfect  
47 teleconsultation to correct them quickly before it becomes routinized and bad behaviors  
48  
49  
50  
51  
52  
53  
54  
55  
56  
57  
58  
59  
60

1  
2  
3 crystallize. Finally, healthcare systems have gone through a technological advancement  
4 precipitated by the pandemic crisis and the integration of the patient experience has  
5 often been sidelined. The experiential knowledge of patients makes them credible and  
6 indispensable actors in the improvement of health care and services. The patient  
7 perspective must therefore be part of the balanced implementation of optimal  
8 teleconsultation that is currently taking place.  
9  
10  
11  
12  
13  
14  
15  
16

### 17 **Conflict of interest statements**

18 The authors declare having no potential conflicts of interest with respect to the research,  
19 authorship and/or publication of this article. Also, no financial interest or benefit arisen  
20 from the direct application of this study.  
21  
22  
23  
24  
25

### 26 **Funding statement**

27 This work was supported by the Fonds de Recherche du Québec en Santé under Grant  
28 number PCIBL-2.  
29  
30  
31  
32

### 33 **Acknowledgments**

34 The authors would like to thank all the participants for their valuable contribution to this  
35 research, Daniel-Constantin Manolescu for reviewing part of the manuscript, and  
36 Priscilla Beaupré and Amélie Boudreault for their help in collecting the data. Marie-Eve  
37 Poitras (junior) received a Research Career Scholar from the Fond de la recherche du  
38 Québec en santé (FRQS) and holds an academic chair of the Université de Sherbrooke  
39 on Optimal Professional Practices in Primary Care. This study was financially supported  
40 by the Fonds de recherche en Santé du Québec (FRQS), Grant number PCIBL-2.  
41  
42  
43  
44  
45  
46  
47  
48

### 49 **Author contributions**

50 MEP, YC, MDP, GG, and SM contributed to the conception and design of the study. CC,  
51 GG, MDP, AG, MO, AM, PB and AB collected the data and conducted interviews. CC,  
52 MDP, MEP, YC and VTV performed the coding and thematic analysis and interpretation  
53 of the results. VTV and CC wrote the draft of the manuscript and all authors commented  
54  
55  
56  
57  
58  
59  
60

1  
2  
3 on previous versions of the manuscript. All authors read and approved the final  
4 manuscript.  
5  
6  
7

### 8 **Ethics approval**

9  
10 The study (project #2019-037) obtained ethical approval from the Centre intégré  
11 universitaire de santé et de services sociaux du Saguenay Lac-St-Jean and all  
12 participants provided consent to participate.  
13  
14  
15

### 16 **Data Sharing Statement**

17  
18 Unpublished data can be accessed by contacting the corresponding author.  
19  
20  
21  
22  
23  
24  
25  
26  
27  
28  
29  
30  
31  
32  
33  
34  
35  
36  
37  
38  
39  
40  
41  
42  
43  
44  
45  
46  
47  
48  
49  
50  
51  
52  
53  
54  
55  
56  
57  
58  
59  
60

## References

1. Lemire F, Sisler J. L'intégration des soins virtuels en médecine de famille. *Canadian Family Physician* 2020;66(2):151-51.
2. Centre intégré de santé et de services sociaux de la Gaspésie. Guide de soutien en télésanté, lignes directrices et bonnes pratiques 2020 [Available from: <https://www.ciass-gaspesie.gouv.qc.ca/wp-content/uploads/2020/11/Guide-bonnes-pratiques-telesante-CIASS-Gaspesie-Novembre-2020.pdf>].
3. Ministère de la Santé et des Services Sociaux. Utilisation de la télésanté en vertu du décret d'urgence sanitaire 2021 [Available from: <https://publications.msss.gouv.qc.ca/msss/fichiers/2021/21-915-01W.pdf>].
4. Gouvernement du Québec. Groupe de médecine de famille (GMF), groupe de médecine de famille universitaire (GMF-U) et super-clinique. 2021
5. Rogers EM. Diffusion of innovations 5th ed. New York: Free Press of Glencoe 2003:576.
6. Breton M, Hudon, Catherine, . La première vague de Covid-19 au Québec et les soins primaires. *Rev Med Suisse* 2020
7. Carrier J, Poitras, ME., Girard, A., Lesage, A., Cormier, C., & Berbiche, D. Outpatient follow-up practices and the well-being of primary care and mental health nurses during the first wave of the COVID-19 pandemic: A cross-sectional survey. *International journal of Nursing Studies* 2021
8. Unité d'évaluation médicale du CHRU de Nancy. Partenariat de soins. L'accès aux soins à distance & COVID 19 | Retours d'expériences des patients et professionnels de santé. Newsletter des patients partenaires du CHRU de Nancy/septembre2020 [Available from: [www.chu-nancy.fr/images/patients\\_partenaires\\_newsletter\\_02.pdf](http://www.chu-nancy.fr/images/patients_partenaires_newsletter_02.pdf)].
9. Isautier JM, Copp T, Ayre J, et al. People's Experiences and Satisfaction With Telehealth During the COVID-19 Pandemic in Australia: Cross-Sectional Survey Study. *Journal of medical Internet research* 2020;22(12):e24531. doi: 10.2196/24531 [published Online First: 2020/11/07]
10. Breton M, Sullivan E. E, Deville-Stoetzel N, et al. Telehealth challenges during COVID-19 as reported by primary healthcare physicians in Quebec and Massachusetts. *BMC family practice* 2021;22(1):192. doi: 10.1186/s12875-021-01543-4 [published Online First: 2021/09/27]
11. Foster MV, Sethares KA. Facilitators and barriers to the adoption of telehealth in older adults: an integrative review. *CIN: Computers, Informatics, Nursing* 2014;32(11):523-33.
12. Lopez AM, Lam K, Thota R. Barriers and Facilitators to Telemedicine: Can You Hear Me Now? *American Society of Clinical Oncology Educational Book* 2021(41):25-36. doi: 10.1200/edbk\_320827
13. Hardcastle L, Ogbogu U. Virtual care: Enhancing access or harming care? *Healthc Manage Forum* 2020;33(6):288-92. doi: 10.1177/0840470420938818 [published Online First: 2020/07/21]
14. Waseem N, Boulanger M, Yanek LR, et al. Disparities in Telemedicine Success and Their Association With Adverse Outcomes in Patients With Thoracic Cancer During the COVID-19 Pandemic. *JAMA Network Open* 2022;5(7):e2220543-e43. doi: 10.1001/jamanetworkopen.2022.20543
15. Le Journal de Montréal. La télémédecine augmente les consultations aux urgences 2021 [Available from: <https://www.journaldemontreal.com/2021/04/25/la-telemedecine-augmente-les-consultations-aux-urgences-1>].
16. Indexsanté. Télémédecine : avantages et inconvénients 2020 [Available from: <https://www.indexsante.ca/chroniques/634/telemedecine-avantages-et-inconvenients.php>].
17. Unité d'évaluation des technologies et des modes d'intervention en santé et en services sociaux. Évaluation exploratoire de la pertinence, de l'utilité et des impacts des téléconsultations 2020 [Available from: [https://iucpq.qc.ca/sites/default/files/rapport\\_etmis\\_telesante\\_iucpq-ciuss estrie\\_chus\\_09-2020.pdf](https://iucpq.qc.ca/sites/default/files/rapport_etmis_telesante_iucpq-ciuss estrie_chus_09-2020.pdf)].

18. Association médicale canadienne. Virtual care in Canada : Discussion paper. CMA health summit, 2019:24.
19. Editorial. Telehealth is here to stay. *Nature Medicine* 2021;27(7):1121-21. doi: 10.1038/s41591-021-01447-x
20. Mason R FTC. Telehealth is here to stay - Long after the pandemic. *Forbes* 2021 November 2.
21. Collège des médecins du Québec. Les téléconsultations réalisées par les médecins durant la pandémie de COVID-19 2020 [Available from: <http://www.cmq.org/publications-pdf/p-1-2020-03-31-fr-les-teleconsultations-realisees-par-les-medecins-durant-la-pandemie-de-covid-19.pdf>.
22. Gouvernement du Québec. Coffre à outils pour le professionnel de la santé 2020 [Available from: <https://telesantequebec.ca/aide-et-soutien/coffre-a-outils-pour-le-professionnel-en-telesante/>.
23. Ahmad F, Wysocki RW, Fernandez JJ, et al. Patient Perspectives on Telemedicine During the COVID-19 Pandemic. *Hand (New York, NY)* 2021:15589447211030692. doi: 10.1177/15589447211030692 [published Online First: 2021/09/14]
24. Bodine CD, Das DG, Haywood K, et al. Barriers to telehealth: The patient perspective. *Journal of Clinical Oncology* 2020;38(29\_suppl):266-66. doi: 10.1200/JCO.2020.38.29\_suppl.266
25. Ramaswamy A, Yu M, Drangsholt S, et al. Patient Satisfaction With Telemedicine During the COVID-19 Pandemic: Retrospective Cohort Study. *Journal of medical Internet research* 2020;22(9):e20786. doi: 10.2196/20786 [published Online First: 9.9.2020]
26. David J. Kirby JWF, Daniel B. Buchalter, Michael J. Moses, Eoghan T. Hurly, Dennis A. Cardone, S. Steven Yang, Mandeep S. Virk, Andrew S. Rokito, Laith M. Jazrawi, and Kirk A. Campbell. Patient and Physician Satisfaction with Telehealth During the COVID-19 Pandemic: Sports Medicine Perspective. *Telemedicine and e-Health* 2021;27(10):1151-59. doi: 10.1089/tmj.2020.0387
27. Hoyt K, Reynolds A. The Patient Perspective on Telemedicine. *Clinical Liver Disease*;n/a(n/a) doi: <https://doi.org/10.1002/cld.1188>
28. Ladin K, Porteny T, Perugini JM, et al. Perceptions of Telehealth vs In-Person Visits Among Older Adults With Advanced Kidney Disease, Care Partners, and Clinicians. *JAMA Network Open* 2021;4(12):e2137193-e93. doi: 10.1001/jamanetworkopen.2021.37193
29. Hiratsuka V, Delafield R, Starks H, et al. Patient and provider perspectives on using telemedicine for chronic disease management among Native Hawaiian and Alaska Native people. *International journal of circumpolar health* 2013;72 doi: 10.3402/ijch.v72i0.21401 [published Online First: 2013/08/27]
30. Omboni S, Ballatore T, Rizzi F, et al. Telehealth at scale can improve chronic disease management in the community during a pandemic: An experience at the time of COVID-19. *PLOS ONE* 2021;16(9):e0258015. doi: 10.1371/journal.pone.0258015
31. Fortin M, Bravo G, Hudon C, et al. Prevalence of Multimorbidity Among Adults Seen in Family Practice. *The Annals of Family Medicine* 2005;3(3):223. doi: 10.1370/afm.272
32. Parry David SJ, Macaulay C. Ann. . Guide sur la collaboration entre les chercheurs et les utilisateurs des connaissances dans la recherche en santé 2015 [Available from: <https://cihr-irsc.gc.ca/f/44954.html>.
33. Miles MB, Huberman AM, Saldana J. Qualitative data analysis: A methods sourcebook. 2014
34. Poitras M-E. Chronic disease patients' experience with telehealth interventions and self-care strategies during the first wave of the COVID-19 pandemic. 2021
35. Breton M, Lévesque JF, Pineault R, et al. Primary Care Reform: Can Quebec's Family Medicine Group Model Benefit from the Experience of Ontario's Family Health Teams? *Healthcare policy = Politiques de sante* 2011;7(2):e122-35. [published Online First: 2012/11/02]
36. Tong A, Sainsbury P, Craig J. Consolidated criteria for reporting qualitative research (COREQ): a 32-item checklist for interviews and focus groups. *International Journal for Quality in Health Care* 2007;19(6):349-57. doi: 10.1093/intqhc/mzm042



- 1  
2  
3 37. Canada Idresd. Stratégie de recherche axée sur le patient - Cadre d'engagement des patients Ottawa:  
4 Gouvernement du Canada; 2020 [updated 2019-05-27; cited 2021 14 mars]. Available from:  
5 <https://cihr-irsc.gc.ca/f/48413.html> accessed 13 mars 2021.  
6  
7 38. Poitras M-E, Godbout I, T Vaillancourt V, et al. Step-by-step Strategies for an Integrated Patient-  
8 Oriented Research: Lessons Learned from a Multicentered Study. *Science of Nursing and Health*  
9 *Practices / Science infirmière et pratiques en santé* 2020;3(2):1-9. doi:  
10 <https://doi.org/10.31770/2561-7516.1068>  
11  
12 39. Poitras M-E MS, Couturier Y, Gagnon D, Duhoux A, Gaboury I, Doucet E, T Vaillancourt V, Ben Charif  
13 A, Ramond-Roquin A, Gauthier G, Poirier M-D, Lukewich J, Careau E, Ashcroft R, Delli Colli N,  
14 Hudon C. Co-design, implementation, and evaluation of an expanded train-the- trainer strategy  
15 to support the sustainability of evidence-based practice guides for family practice nurses and  
16 social workers in primary care clinic: A developmental evaluation protocol. *BMC family practice*  
17 2022;23(84) doi: <https://doi.org/10.1186/s12875-022-01684-0>  
18  
19 40. Organisation for Economic Co-operation and Development. PaRIS survey of Patients with Chronic  
20 Conditions 2019 [Available from: [https://www.oecd.org/health/health-systems/PaRIS-survey-](https://www.oecd.org/health/health-systems/PaRIS-survey-Patients-with-Chronic-Conditions-June-2019.pdf)  
21 [Patients-with-Chronic-Conditions-June-2019.pdf](https://www.oecd.org/health/health-systems/PaRIS-survey-Patients-with-Chronic-Conditions-June-2019.pdf).  
22  
23 41. Parameswaran UD, Ozawa-Kirk JL, Latendresse G. To live (code) or to not: A new method for coding  
24 in qualitative research. *Qualitative Social Work* 2020;19(4):630-44. doi:  
25 10.1177/1473325019840394  
26  
27 42. Le collège des médecins de famille du Canada. Soins centrés sur le patient dans les centres de  
28 médecine de famille 2014 [Available from:  
29 [https://patientsmedicalhome.ca/files/uploads/BA\\_PatCentre\\_FRE\\_Oct.10.2014\\_FINAL.pdf](https://patientsmedicalhome.ca/files/uploads/BA_PatCentre_FRE_Oct.10.2014_FINAL.pdf).  
30  
31 43. Institut national de santé publique du Québec. Ligne du temps COVID-19 au Québec 2022 [Available  
32 from: <https://www.inspq.qc.ca/covid-19/donnees/ligne-du-temps>.  
33  
34 44. Flodgren G, Rachas A, Farmer AJ, et al. Interactive telemedicine: effects on professional practice and  
35 health care outcomes. *Cochrane Database of Systematic Reviews* 2015(9)  
36  
37 45. Ramaswamy A, Yu M, Drangsholt S, et al. Patient Satisfaction With Telemedicine During the COVID-  
38 19 Pandemic: Retrospective Cohort Study. *J Med Internet Res* 2020;22(9):e20786-e86. doi:  
39 10.2196/20786  
40  
41 46. Schaller P, Kherad O, Jaunin-Stadler N, et al. Centre de santé de soins primaires: à quoi ressemblera-  
42 t-il dans le futur? *Revue médicale suisse* 2021;17(738):934-38.  
43  
44 47. Collège des médecins du Québec. Rencontre en personne ou téléconsultation : comment trancher?  
45 2021 [Available from: [http://www.cmq.org/publications-pdf/p-1-2021-02-18-fr-rencontre-en-](http://www.cmq.org/publications-pdf/p-1-2021-02-18-fr-rencontre-en-personne-teleconsultation-comment-trancher.pdf?t=1639497647477)  
46 [personne-teleconsultation-comment-trancher.pdf?t=1639497647477](http://www.cmq.org/publications-pdf/p-1-2021-02-18-fr-rencontre-en-personne-teleconsultation-comment-trancher.pdf?t=1639497647477).  
47  
48 48. Khoong EC, Butler BA, Mesina O, et al. Patient interest in and barriers to telemedicine video visits in a  
49 multilingual urban safety-net system. *Journal of the American Medical Informatics Association*  
50 2021;28(2):349-53.  
51  
52 49. Haute Autorité de Santé. Réponses rapides dans le cadre du COVID-19 -Téléconsultation et télésoin  
53 2020 [Available from: [https://www.has-sante.fr/jcms/p\\_3168867/fr/reponses-rapides-dans-le-](https://www.has-sante.fr/jcms/p_3168867/fr/reponses-rapides-dans-le-cadre-du-covid-19-teleconsultation-et-telesoin)  
54 [cadre-du-covid-19-teleconsultation-et-telesoin](https://www.has-sante.fr/jcms/p_3168867/fr/reponses-rapides-dans-le-cadre-du-covid-19-teleconsultation-et-telesoin).  
55  
56 50. Graves M, Doucet S. Factors affecting interprofessional collaboration when communicating through  
57 the use of information and communication technologies: a literature review. *Journal of Research*  
58 *in Interprofessional Practice and Education* 2016;6(2)  
59  
60 51. Donnelly C, Ashcroft R, Bobbette N, et al. Interprofessional primary care during COVID-19: a survey of  
the provider perspective. *BMC family practice* 2021;22(1):31. doi: 10.1186/s12875-020-01366-9  
[published Online First: 2021/02/05]  
52  
53 52. Wharton G. A, Sood H. S, Sissons A, et al. Virtual primary care: fragmentation or integration? *The*  
54 *Lancet Digital health* 2019;1(7):e330-e31. doi: 10.1016/s2589-7500(19)30152-9 [published  
55 Online First: 2020/12/17]



- 1  
2  
3 53. Poitras M-E CY, Beaupré P, Girard A, Aubry F, T Vaillancourt V, Carrier J D, Fortin L, Racine J, Morin A,  
4 Boudreault A, Cormier C. Les compétences en pratiques collaboratives interprofessionnelles des  
5 professionnels de la santé et des services sociaux en contexte virtuel : une étude de portée.  
6 *Conseil de recherches en sciences humaines du Canada (CRSH)* 2021  
7  
8 54. Agha Z, Roter DL, Schapira RM. An evaluation of patient-physician communication style during  
9 telemedicine consultations. *Journal of medical Internet research* 2009;11(3):e36.  
10  
11 55. Collège des médecins de famille du Canada. Soins virtuels dans le Centre de médecine de famille.  
12 Mississauga, ON, 2021:12.  
13  
14 56. Marshall EG, Breton M, Cossette B, et al. The PUPPY Study—Protocol for a Longitudinal Mixed  
15 Methods Study Exploring Problems Coordinating and Accessing Primary Care for Attached and  
16 Unattached Patients Exacerbated During the COVID-19 Pandemic Year. *medRxiv* 2021  
17  
18 57. Dunsch F, Evans DK, Macis M, et al. Bias in patient satisfaction surveys: a threat to measuring  
19 healthcare quality. *BMJ Global Health* 2018;3(2):e000694. doi: 10.1136/bmjgh-2017-000694  
20  
21 58. Hays RD, Ware JE. My Medical Care Is Better Than Yours: Social Desirability and Patient Satisfaction  
22 Ratings. *Medical Care* 1986;24(6):519-25.  
23  
24 59. Fang J, Liu L, Fang P. What is the most important factor affecting patient satisfaction - a study based  
25 on gamma coefficient. *Patient preference and adherence* 2019;13:515-25. doi:  
26 10.2147/ppa.s197015 [published Online First: 2019/05/23]  
27  
28 60. Naidu A. Factors affecting patient satisfaction and healthcare quality. *International journal of health  
29 care quality assurance* 2009;22(4):366-81. doi: 10.1108/09526860910964834 [published Online  
30 First: 2009/09/04]  
31  
32 61. Batbaatar E, Dorjdagva J, Luvsannyam A, et al. Determinants of patient satisfaction: a systematic  
33 review. *Perspectives in Public Health* 2017;137(2):89-101. doi: 10.1177/1757913916634136  
34  
35  
36  
37  
38  
39  
40  
41  
42  
43  
44  
45  
46  
47  
48  
49  
50  
51  
52  
53  
54  
55  
56  
57  
58  
59  
60

1  
2  
3 **Continuity of teleconsultation in primary care after the COVID-19 pandemic : The perspective of**  
4 **patients living with chronic diseases**  
5

6 **Running heading: Perspective of patients living with chronic diseases on teleconsultation**  
7

8 **The Patient**  
9

10 Marie-Eve Poitras \*, RN, PhD, Research chair on optimal professional practice in primary care,  
11 Department of Family Medicine and Emergency Medicine, Faculty of Medicine and Health  
12 Sciences, Université de Sherbrooke, Saguenay, Canada  
13

14 \*Corresponding author

15 305 Rue Saint Vallier, Chicoutimi,

16 QC G7H 5H6

17 418-541-1234, ext. 3249

18 marie-eve.poitras@usherbrooke.ca

19 ORCID: 0000-0002-3315-0190  
20  
21

22 Marie-Dominique Poirier, Patient-partner, Centre intégré universitaire de santé et de services  
23 sociaux du Saguenay-Lac-Saint-Jean, Saguenay, Canada  
24

25 Yves Couturier, PhD, Department of Social Work, Université de Sherbrooke, Sherbrooke, Canada

26 ORCID: 0000-0001-6848-8354  
27  
28

29 Vanessa T. Vaillancourt, MSc, Department of Family Medicine and Emergency Medicine, Faculty of  
30 Medicine and Health Sciences, Université de Sherbrooke, Saguenay, Canada

31 ORCID: 0000-0002-9187-2300  
32  
33

34 Caroline Cormier, M. Ps. Éd., Department of Family Medicine and Emergency Medicine, Faculty of  
35 Medicine and Health Sciences, Université de Sherbrooke, Saguenay, Canada  
36

37 Gilles Gauthier, Patient-Partner, Centre intégré universitaire de santé et de services sociaux du  
38 Saguenay Lac Saint Jean, Saguenay, Canada  
39

40 Audrey Gendron, MD (c), Department of Family Medicine and Emergency Medicine, Faculty of  
41 Medicine and Health Sciences, Université de Sherbrooke, Saguenay, Canada  
42

43 Megan L. Oswick, MD (c), Department of Family Medicine and Emergency Medicine, Faculty of  
44 Medicine and Health Sciences, Université de Sherbrooke, Saguenay, Canada  
45

46 Anaëlle Morin, MSc (c), Department of Family Medicine and Emergency Medicine, Faculty of  
47 Medicine and Health Sciences, Université de Sherbrooke, Saguenay, Canada  
48

49 Patricia Blanchette, RN, MSc, Department of Family Medicine and Emergency Medicine,  
50 Université de Sherbrooke, Saguenay, Canada  
51

52 Andréanne Bernier, MN, Department of Health Sciences, Université du Québec en Abitibi-  
53 Témiscamingue, Québec, Canada  
54  
55  
56  
57  
58  
59  
60

## Electronic Supplementary Material

### Appendices

#### Appendix 1: Interview guide for patients of FMGs, participating in the F2PL project, on their perception of an ideal remote consultation in COVID-19 times

##### INTRODUCTION

Hello MR. or MS. (NAME OF PARTICIPANT), how are you?

My name is (YOUR NAME), I am a (research agent, student or patient-researcher) on the F2PL project team.

I am part of the F2PL research project in which you are participating, which aims to better understand how professionals in FMGs respond to patient needs. You met or spoke with members of our team in the fall of 2019 or winter of 2020. Our team did a phone interview with you this summer, do you remember?

MR. or MS. (NAME OF PARTICIPANT) is this a good time to talk to you?

1. NO: Can we schedule an appointment at a time that is more convenient for you? (Schedule an appointment and let him/her know we will contact him/her then, thank him/her and hang up)
2. YES: Continue

I am calling you today to hear from you and to ask you a few questions about your perception of the care and services you have received through remote consultations since the beginning of the pandemic in your FMG (medical clinic). A remote consultation is any follow-up by a healthcare professional that did not take place face-to-face.

Our call should last about 30 minutes.

May I ask you a few questions?

May I record our call?

1. PATIENT REFUSED: No problem, thank you. Our team will contact you again when it is time for the next F2PL interview.
2. PATIENT ACCEPTS: Great, thank you very much. If you agree, I will now record the interview.

##### INTERVIEW QUESTIONS

1. First of all, I would like to know how you're doing in this particular Covid-19 pandemic period?
2. Since our last call this summer, have you consulted a healthcare professional (or assisted a loved one in a meeting) in your FMG?

1  
2  
3 \* Note, if patients talk about their doctor, let them talk, then specify for nurses or SW's.  
4 If yes: question 3  
5 If no: would you have needed a consultation? If yes or no, why? If the meeting  
6 had been possible, how would you have liked this? question 4  
7  
8  
9

10 **3. Can you tell me about your experience from the beginning?**

11 *Sub-questions:*

- 12  
13 a. What professional(s) did you meet with?  
14  
15 i. What professionals other than the physician did you meet with?  
16  
17 ii. Was this the first time you met with this professional? How long  
18 have you been followed?  
19  
20 iii. Did you repeat any information that was already known by this  
21 professional?  
22  
23 b. How was the meeting conducted (or by what means)? (e.g. video  
24 conference, call, email, texting) ...  
25  
26 i. Where were you during this meeting?  
27  
28 ii. What were your concerns about confidentiality?  
29  
30 iii. Who accompanied you to your meeting?  
31  
32 c. If it was not by video, do you wish it had been?  
33  
34 d. How did this meeting meet your needs or reason for consultation?  
35  
36 e. How did the remote encounter help or hinder your comfort in talking with  
37 the healthcare professional?  
38  
39 f. What would it take for you to be comfortable? (help with using the  
40 platforms)  
41  
42 g. Why do you think some encounters are better suited for in-person than  
43 remote consultation?  
44  
45 h. How do you see teamwork among healthcare professionals?  
46  
47 i. How do you observe them sharing information?  
48  
49 ii. Have you had any conflicting discussions with them?  
50  
51 i. Why was the teleconsultation equivalent or not in terms of quality?  
52  
53 i. What were the differences in the professional's approach?  
54  
55 ii. What issues would you have liked to discuss with your  
56 professional, but did not dare to address?  
57  
58  
59  
60

- 1  
2  
3           j.       How did you feel called upon as an expert on your health condition during  
4                    your teleconsultation meeting?  
5  
6                    i.       How did you express your perception of the situation?  
7  
8                    ii.       How did you have time to think about the different options?  
9  
10                  iii.       How did you explore the benefits and advantages of each option?  
11  
12                  iv.       How were you able to express your personal values about  
13                    managing your health and the choices (treatments, etc.)  
14                    available?  
15  
16                  v.       How did they give importance to what was a priority for you?  
17  
18                  vi.       How was the involvement of your loved ones in your care  
19                    addressed?  
20  
21                  vii.       Do you have a follow-up care plan that addresses your health  
22                    and wellness needs? Has your healthcare provider reviewed your  
23                    medication in the past year? Did the md inquire if it was  
24                    appropriate for you (cost, side effects, etc.)  
25

26 (Expected answers: I spoke with the secretary; she was helpful, she guided me with the use of the  
27 web platform. They offered me if I wanted an in-person, phone or virtual meeting. I met X  
28 professional(s), by phone, because I don't have access to the internet).  
29  
30

31 **4.       Would you have any advice for the healthcare professionals in your FMG to make the**  
32 **remote consultation ideal?**  
33

34 *(Suggested probes to rephrase the question if needed):*

- 35       - How might healthcare professionals ensure that patients' needs have been met  
36       during a remote consultation?  
37           o How were you asked the question?  
38       - What's important to you in a remote encounter?  
39       - What are your needs and expectations during a remote encounter?  
40       - How would you like the teleconsultation meetings to continue over time?  
41  
42

43 (Expected responses: the doctor didn't move, I felt like the screen stopped working... I wish he  
44 had nodded... I found it harder to feel the empathy of the professional through the screen, he  
45 didn't tell me he would be taking notes during our encounter, I felt like he was disinterested... I  
46 would have liked him to ask me how I found the meeting or to make sure that my understanding  
47 was good, I have hearing difficulties, it was difficult for me to do the meeting by phone)  
48

49 **ACKNOWLEDGEMENTS**  
50

51 Thank you very much, MR. or MS. (NAME OF PARTICIPANT).  
52

53 If you agree, we may get back to you in a few months to chat again.  
54

55 Goodbye.  
56  
57  
58  
59  
60

1  
2  
3 Appendix 2: The perspective of patients with chronic diseases - Recommendations for continuity  
4 of teleconsultation after the pandemic  
5  
6  
7  
8  
9  
10  
11  
12  
13  
14  
15  
16  
17  
18  
19  
20  
21  
22  
23  
24  
25  
26  
27  
28  
29  
30  
31  
32  
33  
34  
35  
36  
37  
38  
39  
40  
41  
42  
43  
44  
45  
46  
47  
48  
49  
50  
51  
52  
53  
54  
55  
56  
57  
58  
59  
60

For peer review only

The perspective of patients with chronic diseases

## Recommendations for continuity of teleconsultation after the pandemic

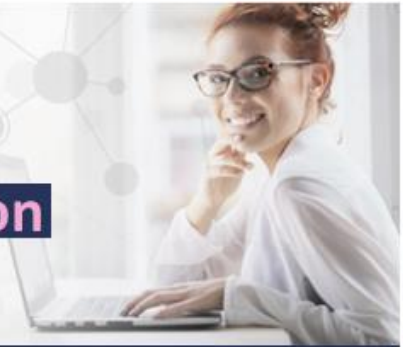

As a patient, I would like

1. To continue receiving teleconsultation services even after the pandemic, but not make it mandatory if it is not beneficial to me.
2. To know the advantages and disadvantages of teleconsultation and face-to-face meetings, so that I can form an opinion that suits my needs.
3. That my preferences are considered when choosing the consultation mode. I don't want to feel that the choice is imposed on me. I want to express myself for each meeting, because my needs evolve with time and my condition.
4. That the professional team considers both my personal characteristics and the determinants of my health as this may influence my ability to have teleconsultation meetings.
5. To have a meeting by phone for certain reasons for consultation, in particular during follow-ups when my condition is stable or for medication renewals, for example. This allows me to save time.
6. That in the event that the reason for my consultation requires a physical examination or visual observation by the healthcare professional, to be able to benefit from a face-to-face appointment from the outset, while avoiding a remote meeting, as this duplicates the appointments.
7. That even if I receive services in teleconsultation, my interprofessional team collaborates. I realize the lack of collaboration even if I am not physically present.
8. That my professional team exhibits the following attitudes for a positive care experience: punctuality, listening, empathy, trust, consideration, knowledge of their profession, availability, involvement, communication and active listening. I capture the professionalism even in teleconsultation.
9. That certain topics are avoided over the phone, especially when it comes to my mental health, weight gain, or other topics that make me uncomfortable.
10. To be able to invite a loved one to join the discussion if I wish. They should be able to hear and watch the consultation like me. I can also consult with him or her to make a decision if I feel the need.

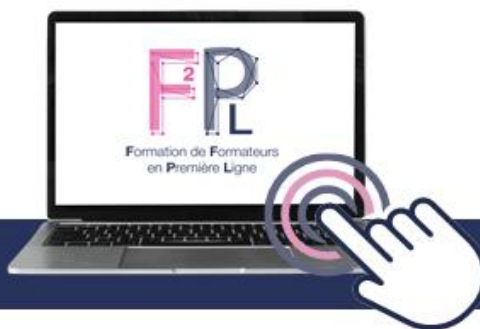

Poitras, ME., Couturier, V., Poirier MD., Massé S., T.Vaillancourt, V., Cormier, C., Morin, A., Beaupré P., Boudreault A., Blanchette P., Bernier AA. (2021).

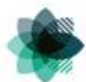

CHAIRE DE RECHERCHE  
SUR LES PRATIQUES  
PROFESSIONNELLES OPTIMALES  
EN SOINS PRIMAIRES

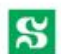

UNIVERSITÉ DE  
SHERBROOKE

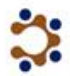

UNITÉ DE SOUTIEN  
SSA | QUÉBEC  
Ensemble pour un système de santé qui apprend

Fonds de recherche  
Santé

Québec



## COREQ (CONsolidated criteria for REporting Qualitative research) Checklist

A checklist of items that should be included in reports of qualitative research. You must report the page number in your manuscript where you consider each of the items listed in this checklist. If you have not included this information, either revise your manuscript accordingly before submitting or note N/A.

| Topic                                          | Item No. | Guide Questions/Description                                                                                                                              | Reported on Page No. |
|------------------------------------------------|----------|----------------------------------------------------------------------------------------------------------------------------------------------------------|----------------------|
| <b>Domain 1: Research team and reflexivity</b> |          |                                                                                                                                                          |                      |
| <i>Personal characteristics</i>                |          |                                                                                                                                                          |                      |
| Interviewer/facilitator                        | 1        | Which author/s conducted the interview or focus group?                                                                                                   |                      |
| Credentials                                    | 2        | What were the researcher's credentials? E.g. PhD, MD                                                                                                     |                      |
| Occupation                                     | 3        | What was their occupation at the time of the study?                                                                                                      |                      |
| Gender                                         | 4        | Was the researcher male or female?                                                                                                                       |                      |
| Experience and training                        | 5        | What experience or training did the researcher have?                                                                                                     |                      |
| <i>Relationship with participants</i>          |          |                                                                                                                                                          |                      |
| Relationship established                       | 6        | Was a relationship established prior to study commencement?                                                                                              |                      |
| Participant knowledge of the interviewer       | 7        | What did the participants know about the researcher? e.g. personal goals, reasons for doing the research                                                 |                      |
| Interviewer characteristics                    | 8        | What characteristics were reported about the interviewer/facilitator? e.g. Bias, assumptions, reasons and interests in the research topic                |                      |
| <b>Domain 2: Study design</b>                  |          |                                                                                                                                                          |                      |
| <i>Theoretical framework</i>                   |          |                                                                                                                                                          |                      |
| Methodological orientation and Theory          | 9        | What methodological orientation was stated to underpin the study? e.g. grounded theory, discourse analysis, ethnography, phenomenology, content analysis |                      |
| <i>Participant selection</i>                   |          |                                                                                                                                                          |                      |
| Sampling                                       | 10       | How were participants selected? e.g. purposive, convenience, consecutive, snowball                                                                       |                      |
| Method of approach                             | 11       | How were participants approached? e.g. face-to-face, telephone, mail, email                                                                              |                      |
| Sample size                                    | 12       | How many participants were in the study?                                                                                                                 |                      |
| Non-participation                              | 13       | How many people refused to participate or dropped out? Reasons?                                                                                          |                      |
| <i>Setting</i>                                 |          |                                                                                                                                                          |                      |
| Setting of data collection                     | 14       | Where was the data collected? e.g. home, clinic, workplace                                                                                               |                      |
| Presence of non-participants                   | 15       | Was anyone else present besides the participants and researchers?                                                                                        |                      |
| Description of sample                          | 16       | What are the important characteristics of the sample? e.g. demographic data, date                                                                        |                      |
| <i>Data collection</i>                         |          |                                                                                                                                                          |                      |
| Interview guide                                | 17       | Were questions, prompts, guides provided by the authors? Was it pilot tested?                                                                            |                      |
| Repeat interviews                              | 18       | Were repeat interviews carried out? If yes, how many?                                                                                                    |                      |
| Audio/visual recording                         | 19       | Did the research use audio or visual recording to collect the data?                                                                                      |                      |
| Field notes                                    | 20       | Were field notes made during and/or after the interview or focus group?                                                                                  |                      |
| Duration                                       | 21       | What was the duration of the interviews or focus group?                                                                                                  |                      |
| Data saturation                                | 22       | Was data saturation discussed?                                                                                                                           |                      |
| Transcripts returned                           | 23       | Were transcripts returned to participants for comment and/or                                                                                             |                      |



| Topic                                  | Item No. | Guide Questions/Description                                                                                                        | Reported on Page No. |
|----------------------------------------|----------|------------------------------------------------------------------------------------------------------------------------------------|----------------------|
|                                        |          | correction?                                                                                                                        |                      |
| <b>Domain 3: analysis and findings</b> |          |                                                                                                                                    |                      |
| <i>Data analysis</i>                   |          |                                                                                                                                    |                      |
| Number of data coders                  | 24       | How many data coders coded the data?                                                                                               |                      |
| Description of the coding tree         | 25       | Did authors provide a description of the coding tree?                                                                              |                      |
| Derivation of themes                   | 26       | Were themes identified in advance or derived from the data?                                                                        |                      |
| Software                               | 27       | What software, if applicable, was used to manage the data?                                                                         |                      |
| Participant checking                   | 28       | Did participants provide feedback on the findings?                                                                                 |                      |
| <i>Reporting</i>                       |          |                                                                                                                                    |                      |
| Quotations presented                   | 29       | Were participant quotations presented to illustrate the themes/findings?<br>Was each quotation identified? e.g. participant number |                      |
| Data and findings consistent           | 30       | Was there consistency between the data presented and the findings?                                                                 |                      |
| Clarity of major themes                | 31       | Were major themes clearly presented in the findings?                                                                               |                      |
| Clarity of minor themes                | 32       | Is there a description of diverse cases or discussion of minor themes?                                                             |                      |

Developed from: Tong A, Sainsbury P, Craig J. Consolidated criteria for reporting qualitative research (COREQ): a 32-item checklist for interviews and focus groups. *International Journal for Quality in Health Care*. 2007. Volume 19, Number 6: pp. 349 – 357

**Once you have completed this checklist, please save a copy and upload it as part of your submission. DO NOT include this checklist as part of the main manuscript document. It must be uploaded as a separate file.**
